# Supplementary material for: Cycloaddition Chemistry of a Silylene‐Nickel Complex toward Organic π‐Systems: From Reversibility to C−H Activation
Source: PubMed Central journal article supplement (PMC7028101; doi:10.1002/chem.202000009), 2020-01-31
Supplement: CHEM-26-1958-s001.pdf [file CHEM-26-1958-s001.pdf]

# CHEMISTRY

## A **European** Journal

### Supporting Information

#### **Cycloaddition Chemistry of a Silylene-Nickel Complex toward Organic $\pi$ -Systems: From Reversibility to C–H Activation**

Terrance J. Hadlington,\* Arseni Kostenko, and Matthias Driess\*<sup>[a]</sup>

chem\_202000009\_sm\_miscellaneous\_information.pdf

# Supporting Information

## Contents:

1. Experimental methods and data.....2
2. X-Ray crystallographic data.....29
3. Computational methods and data.....33

## 1. Experimental methods and data

**General considerations.** All experiments and manipulations were carried out under dry oxygen free dinitrogen using standard Schlenk techniques or in an MBraun inert atmosphere glovebox containing an atmosphere of high purity dinitrogen. Hexane, diethylether, toluene and THF were dried by standard methods. C<sub>6</sub>D<sub>6</sub> and D<sub>8</sub>-THF were stirred over a sonicated potassium mirror for a period of 48 hr and recondensed into a Schlenk tube containing activated 4 Å mol sieves. DCM-d<sub>2</sub> was stirred over CaH<sub>2</sub> for 24 hr and distilled into a Schlenk tube containing activated 4 Å mol sieves. NMR spectra were recorded on a Bruker AV 200, 400, or 500 Spectrometer. The <sup>1</sup>H and <sup>13</sup>C{<sup>1</sup>H} NMR spectra were referenced to the residual solvent signals as internal standards. <sup>29</sup>Si NMR spectra were externally calibrated with SiMe<sub>4</sub>. The starting material [{N(Dipp)(SiMe<sub>3</sub>)}ClSi:→Ni(NHC)<sub>2</sub>] (**1**; <sup>TMS</sup>L = [(Dipp)(SiMe<sub>3</sub>)N]<sup>-</sup>; Dipp = C<sub>6</sub>H<sub>3</sub>-Pr<sup>i</sup>-2,6; NHC = [:C{N(Pr<sup>i</sup>)C(Me)}<sub>2</sub>]) was synthesized according to the known literature procedure.<sup>1</sup> All other reagents were used as received.

**Synthesis of 2.** A solution of **1** (0.2 g, 0.27 mmol) in toluene (10 mL) was cooled to -78 °C, and phenyl acetylene added *via* pipette (30 µL, 0.27 mmol). An immediate color change to deep purple-brown was observed. The reaction mixture was subsequently warmed to ambient temperature, whereupon all volatiles were removed *in vacuo*. The reaction mixture was extracted in warm hexane (15mL), concentrated to ~2 mL, and stored at 4 °C for 2 weeks to afford a crop of deep red-purple crystalline **2** (160 mg, 70 %). <sup>1</sup>H NMR (C<sub>6</sub>D<sub>6</sub>, 400 MHz, 298 K): δ = 0.41 (s, 9H, SiMe<sub>3</sub>), 1.09 (br, 18H, NHC-Pr<sup>i</sup>-CH<sub>3</sub>), 1.35 (overlapping d, 9H, Dipp-Pr<sup>i</sup>-CH<sub>3</sub>), 1.45 (d, <sup>3</sup>J<sub>HH</sub> = 6.8 Hz, 3H, Dipp-Pr<sup>i</sup>-CH<sub>3</sub>), 1.53 (br, 6H, NHC-Pr<sup>i</sup>-CH<sub>3</sub>) 1.76 (s, 6H, NHC-NCMe), 1.81 (s, 6H, NHC-NCMe), 3.98 (sept, <sup>3</sup>J<sub>HH</sub> = 6.8 Hz, 1H, Dipp-Pr<sup>i</sup>-CH), 4.09 (sept, <sup>3</sup>J<sub>HH</sub> = 6.8 Hz, 1H, Dipp-Pr<sup>i</sup>-CH), 5.81 (br, 2H, NHC-Pr<sup>i</sup>-CH), 5.85 (sept, <sup>3</sup>J<sub>HH</sub> = 7.2 Hz, 2H, NHC-Pr<sup>i</sup>-CH), 6.89 (m, 1H, Ar-CH), 7.06 (m, 4H, Ar-CH), 7.21 (m, 3H, Ar-CH); <sup>13</sup>C{<sup>1</sup>H} NMR (C<sub>6</sub>D<sub>6</sub>, 75.5 MHz, 298 K): δ = 2.6 (SiMe<sub>3</sub>), 10.4 and 10.5 (NHC-NCMe), 21.9, 22.7, and 23.1 (br, NHC-Pr<sup>i</sup>-CH<sub>3</sub>), 24.8, 25.4, 25.7, and 26.5 (Dipp-Pr<sup>i</sup>-CH<sub>3</sub>), 28.3 and 28.4 (Dipp-Pr<sup>i</sup>-CH), 52.4 and 52.5 (NHC-Pr<sup>i</sup>-CH), 124.3, 124.4, 125.5, and 125.6 (NHC-NCMe), 123.8, 127.1, 127.7, 128.4, 131.0, 135.5, 141.7, 148.2, and 168.2 (Ar-C), 200.7 and 200.8 (NHC-C:); <sup>29</sup>Si{<sup>1</sup>H} NMR (C<sub>6</sub>D<sub>6</sub>, 80 MHz, 298 K): δ = 6.4 (SiMe<sub>3</sub>), -32.9 (H-Si-L<sup>TMS</sup>); anal. calcd. for C<sub>45</sub>H<sub>72</sub>ClN<sub>5</sub>NiSi<sub>2</sub>: C, 64.85 %; H, 8.71 %; N, 8.40 %; found: C, 64.58 %; H, 9.08%; N, 8.30 %.

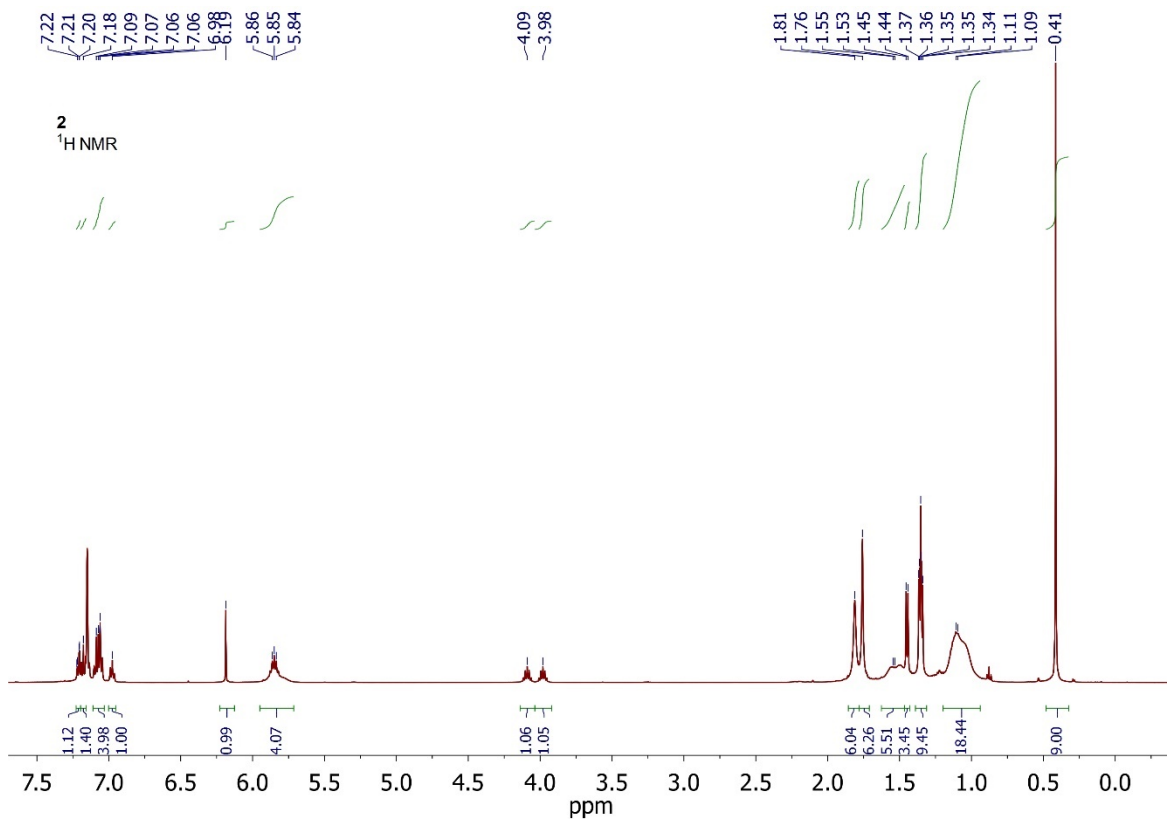

**Figure S1.** <sup>1</sup>H NMR spectrum of **2** dissolved in C<sub>6</sub>D<sub>6</sub>, at 298K.

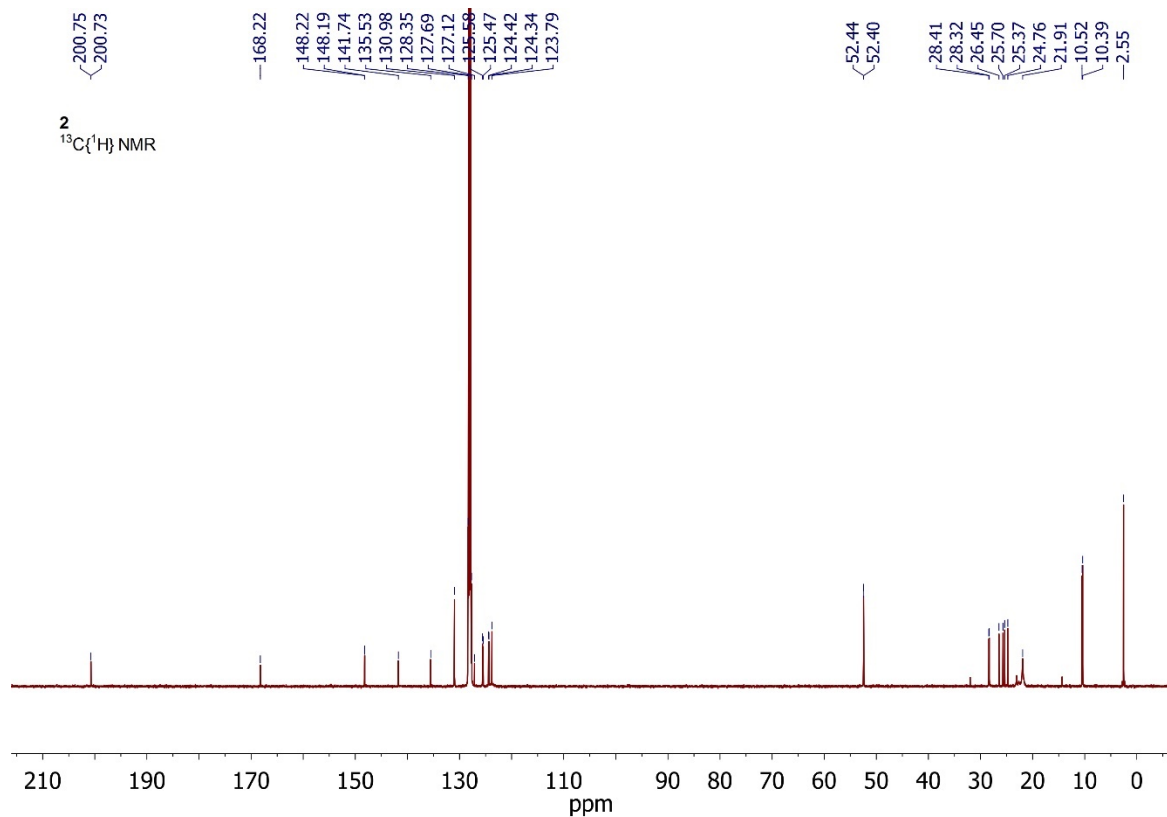

**Figure S2.** <sup>13</sup>C{<sup>1</sup>H} NMR spectrum of **2** dissolved in C<sub>6</sub>D<sub>6</sub>, at 298K.

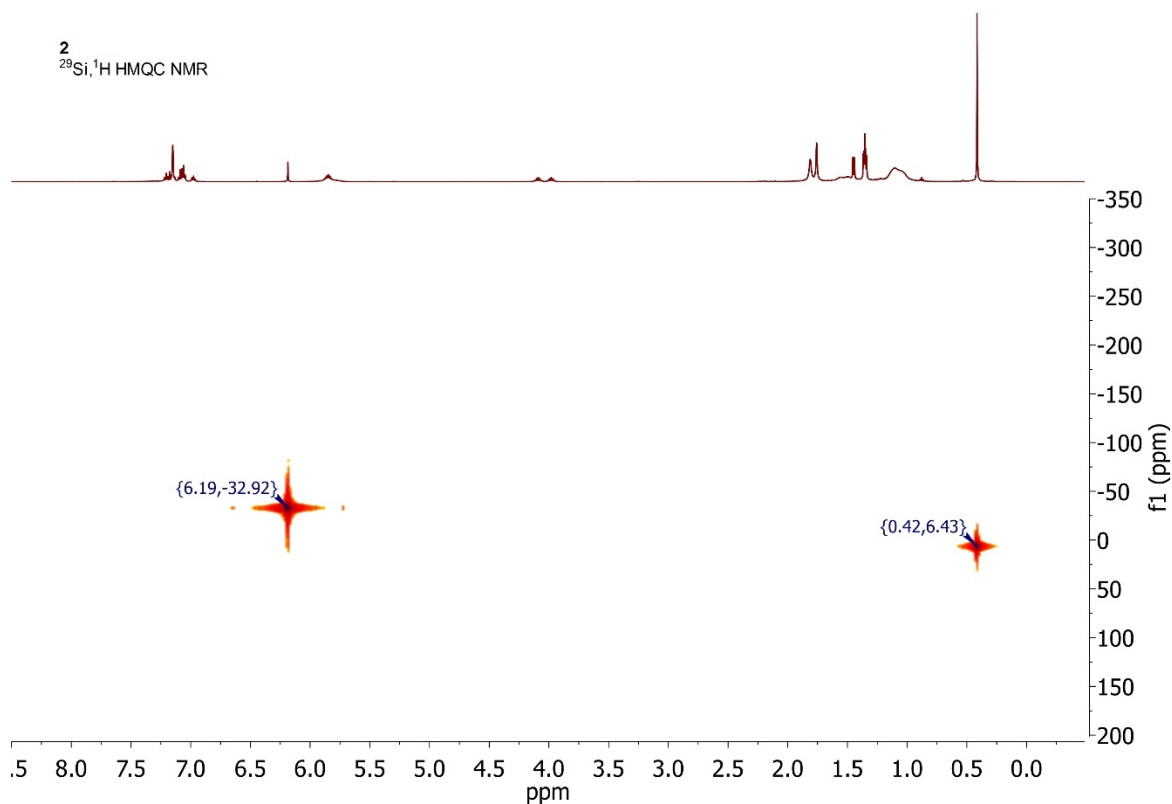

**Figure S3.**  $^{29}\text{Si}, ^1\text{H}$  HMQC NMR spectrum of **2** dissolved in  $\text{C}_6\text{D}_6$ , at 298K.

**Synthesis of 3.** A solution of **1** (0.2 g, 0.27 mmol) in toluene (10 mL), was cooled to  $-78\text{ }^\circ\text{C}$ , and acetophenone added *via* pipette (32  $\mu\text{L}$ , 0.27 mmol), leading to an immediate color change to orange-yellow. The reaction was warmed to  $0\text{ }^\circ\text{C}$ , and all volatiles removed *in vacuo*. The residue was extracted in hexane, filtered, and concentrated to 5 mL. Storage of this solution at ambient temperature led to the formation of a large crop of yellow crystals of **3** over the course of 1 h (150 mg, 65 %). Storage of the solution at this temperature for  $>2$  h periods leads to decomposition of the product.  $^1\text{H}$  NMR ( $\text{D}_8\text{-THF}$ , 400 MHz, 243 K):  $\delta = -11.71$  (s, 1H, Ni-*H*), 0.25 (s, 9H,  $\text{SiMe}_3$ ), 0.94 (d,  $^3J_{\text{HH}} = 6.8$  Hz, 6H, Dipp- $\text{Pr}^i\text{-CH}_3$ ), 0.98-1.34 (overlapping d/br, 27H,  $\text{Pr}^i\text{-CH}_3$ ), 1.47 (br d,  $^3J_{\text{HH}} = 6.8$  Hz, 3H, Dipp- $\text{Pr}^i\text{-CH}_3$ ), 1.55 (br d,  $^3J_{\text{HH}} = 6.8$  Hz, 3H, Dipp- $\text{Pr}^i\text{-CH}_3$ ), 2.16 (s, 6H, NHC-N $\text{CMe}$ ), 2.18 (s, 6H, NHC-N $\text{CMe}$ ), 2.22 (s, 6H, NHC-N $\text{CMe}$ ), 3.97 (br, 2H, Dipp- $\text{Pr}^i\text{-CH}$ ), 4.57 (br, 1H, Ni- $\eta^2\text{-(CH}_2\text{CH-Si)}$ ), 5.20-6.00 (br, 4H, NHC- $\text{Pr}^i\text{-CH}$ ), 5.63 (br, 2H, Ni- $\eta^2\text{-(CH}_2\text{CH-Si)}$ ), 6.88-7.11 (m, 8H, Ar-*CH*);  $^{13}\text{C}\{^1\text{H}\}$  NMR ( $\text{D}_8\text{-THF}$ , 75.5 MHz, 243 K):  $\delta = 5.0$  ( $\text{SiMe}_3$ ), 10.5, and 10.6 (NHC-N $\text{CMe}$ ), 21.5, 21.7, 22.4, and 23.07 (br/overlapping, NHC- $\text{Pr}^i\text{-CH}_3$ ), 25.9, 26.2, 26.5, and 26.9 (Dipp- $\text{Pr}^i\text{-CH}_3$ ), 28.4, and 28.7 (Dipp- $\text{Pr}^i\text{-CH}$ ), 53.8, 53.9, and 54.3 (br, NHC- $\text{Pr}^i\text{-CH}$ ), 91.3 (Ph-C=CH $_2$ ), 125.5, and 127.3 (NHC-N $\text{CMe}$ ), 124.2, 124.3, 125.6, 126.6, 127.9, 140.6, 145.4, 148.1, and 148.2 (Ar-C), 156.6 (Ph-C=CH $_2$ ), 192.1, and 194.2 (NHC-C);  $^{29}\text{Si}\{^1\text{H}\}$  NMR ( $\text{D}_8\text{-THF}$ , 80 MHz, 243 K):  $\delta = 1.6$  ( $\text{SiMe}_3$ ),  $-18.7$  (O- $\text{Si-Ni}$ ); anal. calcd. for  $\text{C}_{45}\text{H}_{74}\text{ClN}_5\text{NiOSi}_2$ : C, 63.48 %; H, 8.76 %; N, 8.23 %; found: C, 63.36 %; H, 8.76 %; N, 8.03 %.

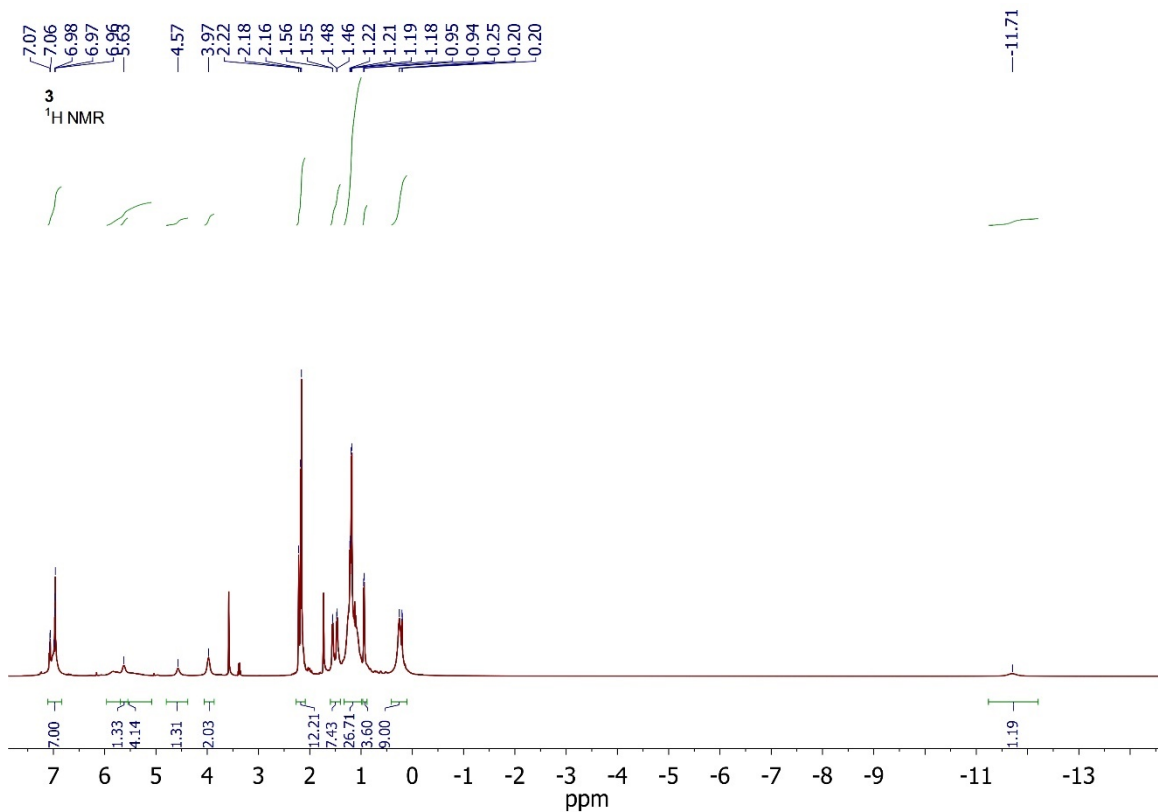

**Figure S4.**  $^1\text{H NMR}$  spectrum of **3** dissolved in  $\text{D}_8\text{-THF}$ , at 243K.

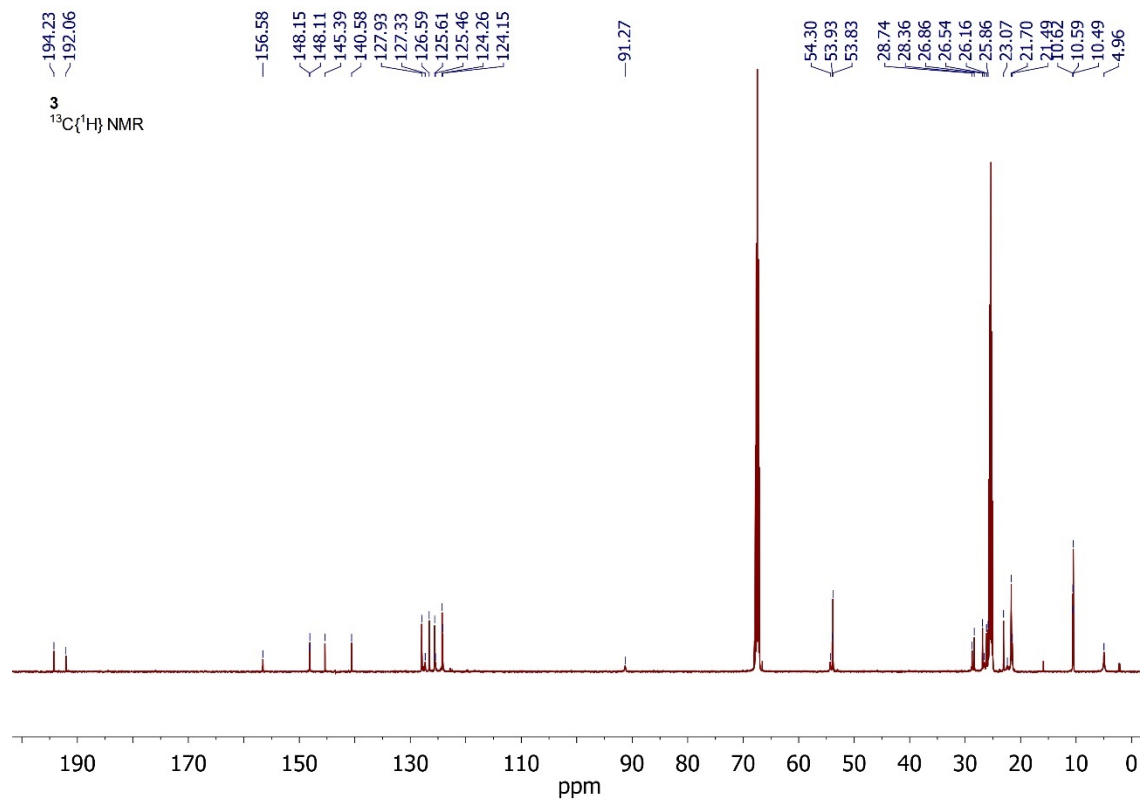

**Figure S5.**  $^{13}\text{C}\{^1\text{H}\}$  NMR spectrum of **3** dissolved in  $\text{D}_8\text{-THF}$ , at 243K.

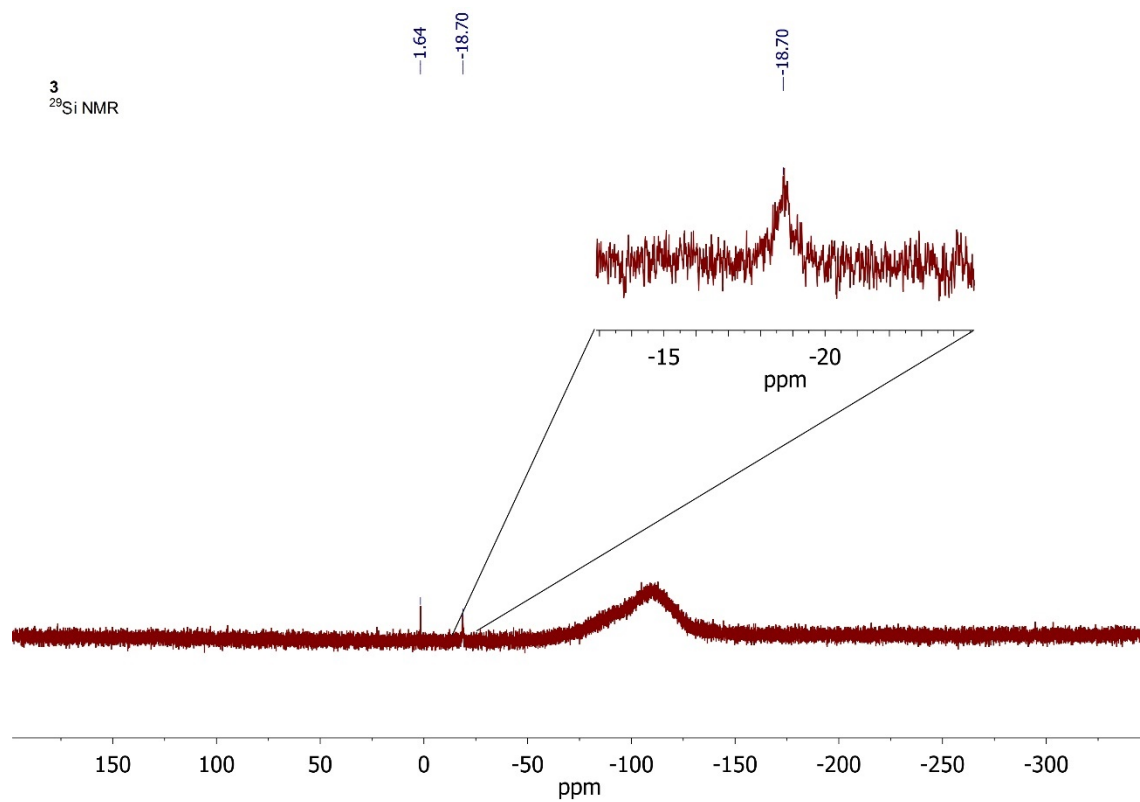

**Figure S6.** <sup>29</sup>Si{<sup>1</sup>H} NMR spectrum of **3** dissolved in D<sub>8</sub>-THF, at 243K.

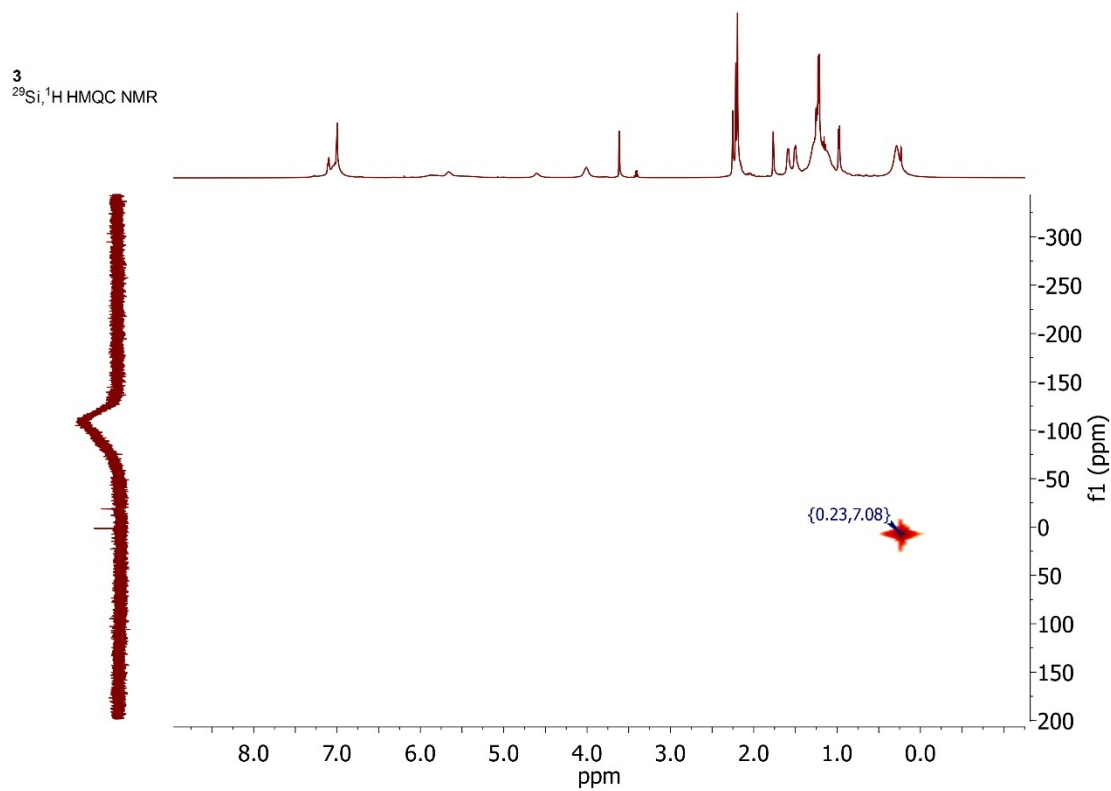

**Figure S7.** <sup>29</sup>Si,<sup>1</sup>H HMQC NMR spectrum of **3** dissolved in D<sub>8</sub>-THF, at 243K.

**Synthesis of 4.** A solution of **1** (0.15 g, 0.21 mmol) in toluene (10 mL) was cooled to -78 °C, and 4-trifluoromethyl benzaldehyde added *via* pipette (25  $\mu$ L, 0.21 mmol), leading to an immediate color change to orange-yellow. The reaction was warmed to 0 °C, and all volatiles removed *in vacuo*. The residue was extracted in hexane, filtered, and concentrated to 5 mL. Storage of this solution at ambient temperature overnight led to the formation of a large crop of orange crystals of **4** (80 mg, 46 %).  $^1\text{H NMR}$  ( $\text{D}_8\text{-THF}$ , 400 MHz, 298 K):  $\delta$  = 0.35 (s, 9H,  $\text{SiMe}_3$ ), 0.39 (d,  $^3J_{\text{HH}}$  = 7.2 Hz, 3H,  $\text{NHC-Pr}^i\text{-CH}_3$ ), 0.59 (overlapping d,  $^3J_{\text{HH}}$  = 7.2 Hz, 6H,  $\text{NHC-Pr}^i\text{-CH}_3$ ), 0.82 (d,  $^3J_{\text{HH}}$  = 6.8 Hz, 3H,  $\text{Dipp-Pr}^i\text{-CH}_3$ ), 1.11 (d,  $^3J_{\text{HH}}$  = 6.8 Hz, 3H,  $\text{Dipp-Pr}^i\text{-CH}_3$ ), 1.16 (d,  $^3J_{\text{HH}}$  = 6.8 Hz, 3H,  $\text{Dipp-Pr}^i\text{-CH}_3$ ), 1.21 (d,  $^3J_{\text{HH}}$  = 6.8 Hz, 3H,  $\text{Dipp-Pr}^i\text{-CH}_3$ ), 1.40 (d,  $^3J_{\text{HH}}$  = 7.2 Hz, 3H,  $\text{NHC-Pr}^i\text{-CH}_3$ ), 1.47 (overlapping d,  $^3J_{\text{HH}}$  = 7.2 Hz, 6H,  $\text{NHC-Pr}^i\text{-CH}_3$ ), 1.74 (d,  $^3J_{\text{HH}}$  = 7.2 Hz, 3H,  $\text{NHC-Pr}^i\text{-CH}_3$ ), 1.85 (d,  $^3J_{\text{HH}}$  = 7.2 Hz, 3H,  $\text{NHC-Pr}^i\text{-CH}_3$ ), 2.04 (s, 12H,  $\text{NHC-NCMe}$ ), 2.08 (s, 12H,  $\text{NHC-NCMe}$ ), 2.15 (s, 12H,  $\text{NHC-NCMe}$ ), 2.34 (s, 12H,  $\text{NHC-NCMe}$ ), 3.57 (sept,  $^3J_{\text{HH}}$  = 6.8 Hz, 1H,  $\text{Dipp-Pr}^i\text{-CH}$ ), 3.78 (sept,  $^3J_{\text{HH}}$  = 6.8 Hz, 1H,  $\text{Dipp-Pr}^i\text{-CH}$ ), 4.52 (sept,  $^3J_{\text{HH}}$  = 7.2 Hz, 1H,  $\text{NHC-Pr}^i\text{-CH}$ ), 5.08 (s, 1H,  $\text{Si-OC(H)(Ph)-Ni}$ ), 5.28 (sept,  $^3J_{\text{HH}}$  = 7.2 Hz, 1H,  $\text{NHC-Pr}^i\text{-CH}$ ), 6.53 (sept,  $^3J_{\text{HH}}$  = 7.2 Hz, 1H,  $\text{NHC-Pr}^i\text{-CH}$ ), 6.80 (sept,  $^3J_{\text{HH}}$  = 7.2 Hz, 1H,  $\text{NHC-Pr}^i\text{-CH}$ ), 6.90 (m, 2H,  $\text{Dipp-}m\text{-Ar-CH}$ ), 6.95 (m, 1H,  $\text{Dipp-}p\text{-Ar-CH}$ ), 7.12 and 7.21 (m, 4H,  $\text{CF}_3\text{-Benzald.-Ar-CH}$ );  $^{13}\text{C}\{^1\text{H}\}$  NMR ( $\text{D}_8\text{-THF}$ , 75.5 MHz, 298 K):  $\delta$  = 4.0 ( $\text{SiMe}_3$ ), 10.3, 10.6, 10.7 and 10.8 ( $\text{NHC-NCMe}$ ), 20.3, 20.9, 21.0, 21.3, 22.6, and 23.1 ( $\text{NHC-Pr}^i\text{-CH}_3$ ), 24.1 and 25.6 ( $\text{Dipp-Pr}^i\text{-CH}_3$ ), 28.5 and 28.7 ( $\text{Dipp-Pr}^i\text{-CH}$ ), 53.0, 53.5, 53.6, and 53.9 ( $\text{NHC-Pr}^i\text{-CH}$ ), 123.4, 123.9, 124.3, and 125.3 ( $\text{NHC-NCMe}$ ), 124.8 (q,  $\text{Ar-CF}_3$ ), 125.9, 126.0, 126.9, 127.8, 144.6, 147.1, 148.7, and 159.1 ( $\text{Ar-C}$ ), 187.5 and 190.5 ( $\text{NHC-C}$ );  $^{19}\text{F}$  NMR ( $\text{D}_8\text{-THF}$ , 188 MHz, 298 K):  $\delta$  = 64.3; anal. calcd. for  $\text{C}_{45}\text{H}_{71}\text{ClF}_3\text{N}_5\text{NiOSi}_2$ : C, 59.70 %; H, 7.90 %; N, 7.74 %; found: C, 59.84 %; H, 8.19 %; N, 7.43 %.

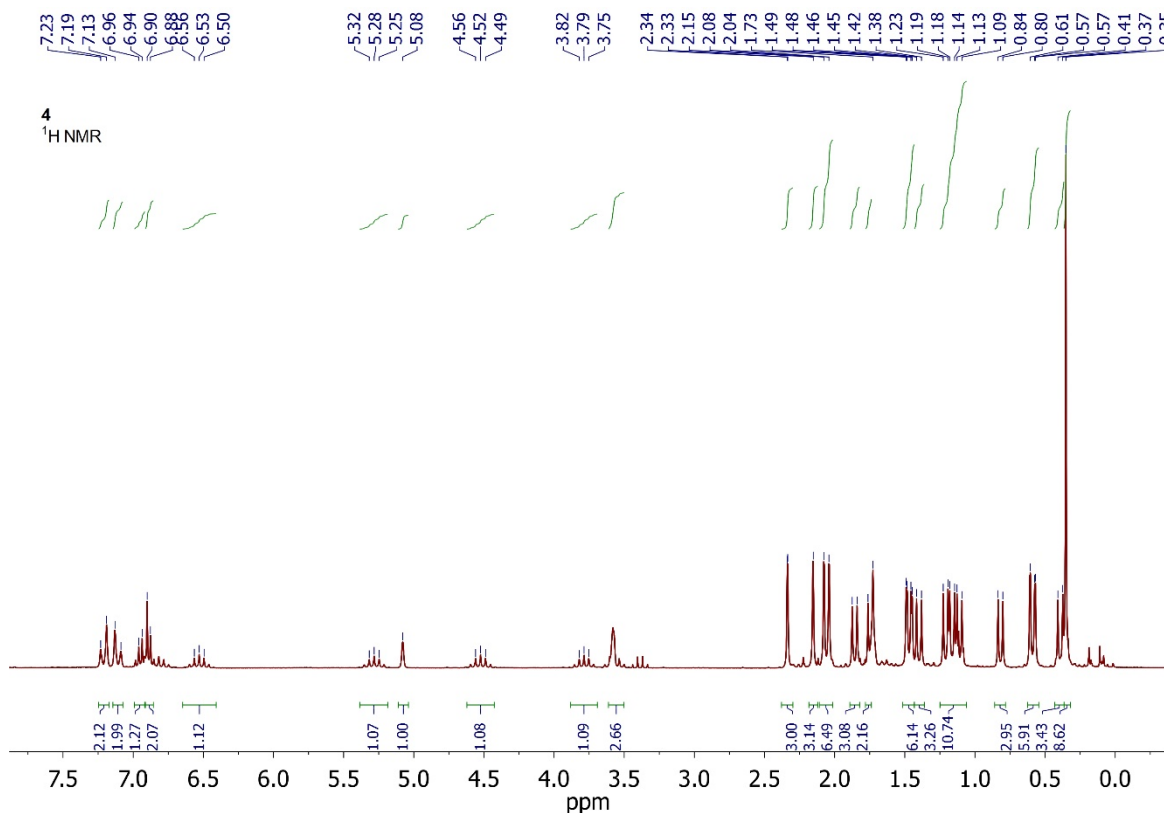

**Figure S8.**  $^1\text{H NMR}$  spectrum of **4** dissolved in  $\text{D}_8\text{-THF}$ , at 298K.



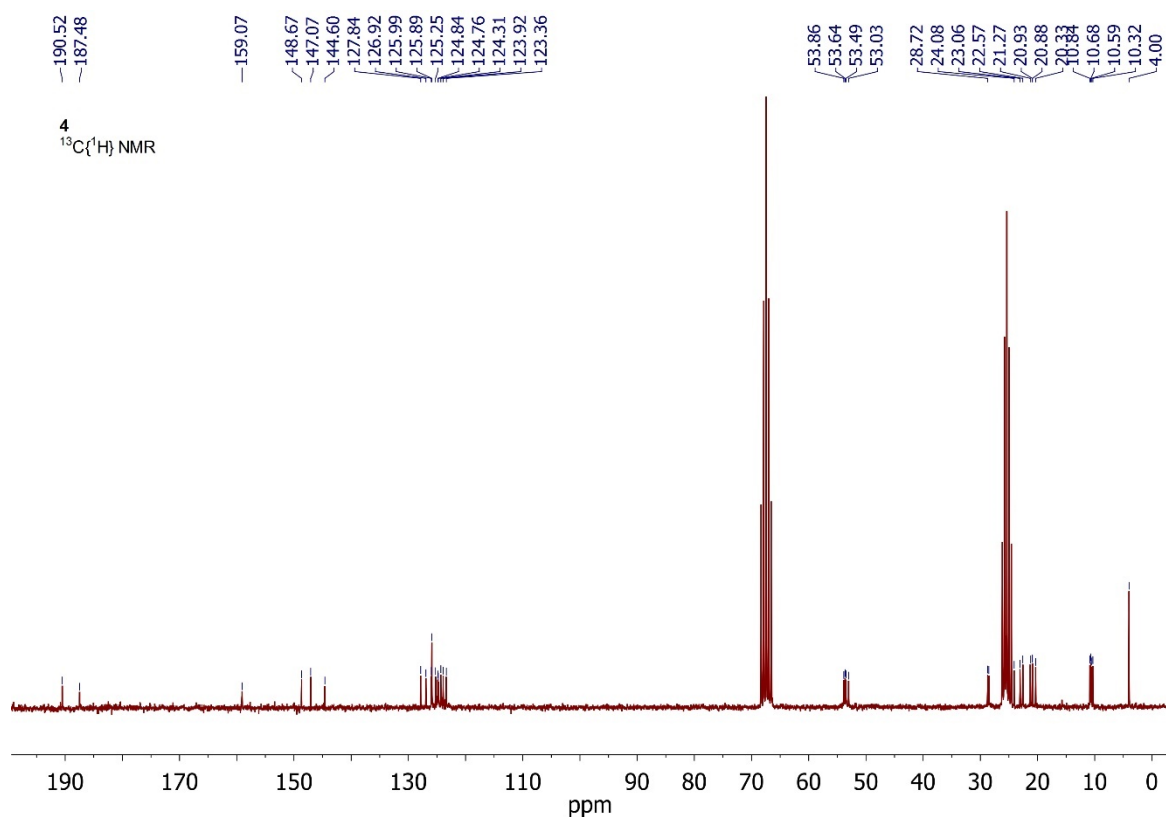

**Figure S9.** <sup>13</sup>C{<sup>1</sup>H} NMR spectrum of **4** dissolved in D<sub>8</sub>-THF, at 298K.

**Synthesis of 5.** A solution of **1** (0.2 g, 0.27 mmol) in toluene (10 mL), was cooled to -78 °C, and N-benzylideneaniline added as a solid (49.7 mg, 0.27 mmol). A color change to orange-yellow was observed after stirring for 2 h with warming to ambient temperature. At this stage, all volatiles were removed from the reaction mixture *in vacuo*, the solid residue extracted in diethyl ether (25 mL), and filtered. Concentration of this solution to 15 mL and storage at 4 °C overnight resulted in the formation of large crop of red-orange crystals of **5** (110 mg, 45 %). <sup>1</sup>H NMR (D<sub>8</sub>-THF, 400 MHz, 298 K): δ = 0.02 (br, 3H, NHC-Pr<sup>i</sup>-CH<sub>3</sub>), 0.26 (s, 9H, SiMe<sub>3</sub>), 0.32 (d, <sup>3</sup>J<sub>HH</sub> = 7.2 Hz, 3H, NHC-Pr<sup>i</sup>-CH<sub>3</sub>), 0.45 (d, <sup>3</sup>J<sub>HH</sub> = 7.2 Hz, 3H, NHC-Pr<sup>i</sup>-CH<sub>3</sub>), 0.51 (d, <sup>3</sup>J<sub>HH</sub> = 7.2 Hz, 3H, NHC-Pr<sup>i</sup>-CH<sub>3</sub>), 0.88 (d, <sup>3</sup>J<sub>HH</sub> = 6.8 Hz, 3H, Dipp-Pr<sup>i</sup>-CH<sub>3</sub>), 1.00 (d, <sup>3</sup>J<sub>HH</sub> = 6.8 Hz, 3H, Dipp-Pr<sup>i</sup>-CH<sub>3</sub>), 1.14 (d, <sup>3</sup>J<sub>HH</sub> = 6.8 Hz, 3H, Dipp-Pr<sup>i</sup>-CH<sub>3</sub>), 1.46 (d, <sup>3</sup>J<sub>HH</sub> = 6.8 Hz, 3H, Dipp-Pr<sup>i</sup>-CH<sub>3</sub>), 1.50 (d, <sup>3</sup>J<sub>HH</sub> = 7.2 Hz, 3H, NHC-Pr<sup>i</sup>-CH<sub>3</sub>), 1.55 (d, <sup>3</sup>J<sub>HH</sub> = 7.2 Hz, 3H, NHC-Pr<sup>i</sup>-CH<sub>3</sub>), 1.77 (d, <sup>3</sup>J<sub>HH</sub> = 7.2 Hz, 3H, NHC-Pr<sup>i</sup>-CH<sub>3</sub>), 1.99 (d, <sup>3</sup>J<sub>HH</sub> = 7.2 Hz, 3H, NHC-Pr<sup>i</sup>-CH<sub>3</sub>), 2.01 (s, 3H, NHC-NCMe), 2.19 (s, 3H, NHC-NCMe), 2.27 (s, 3H, NHC-NCMe), 2.36 (s, 3H, NHC-NCMe), 3.70 (sept, <sup>3</sup>J<sub>HH</sub> = 6.8 Hz, 1H, Dipp-Pr<sup>i</sup>-CH), 3.89 (sept, <sup>3</sup>J<sub>HH</sub> = 6.8 Hz, 1H, Dipp-Pr<sup>i</sup>-CH), 4.31 (s, 1H, Si-N(Ph)C(H)(Ph)-Ni), 4.43 (sept, <sup>3</sup>J<sub>HH</sub> = 7.2 Hz, 1H, NHC-Pr<sup>i</sup>-CH), 5.29 (sept, <sup>3</sup>J<sub>HH</sub> = 7.2 Hz, 1H, NHC-Pr<sup>i</sup>-CH), 6.18 (m, 1H, Ar-CH), 6.56 (m, 5H, Ar-CH), 6.78 (overlapping sept, 1H, NHC-Pr<sup>i</sup>-CH<sub>3</sub>), 6.79-6.94 (m, 7H, Ar-CH), 7.00 (overlapping sept, 1H, NHC-Pr<sup>i</sup>-CH<sub>3</sub>); <sup>13</sup>C{<sup>1</sup>H} NMR (D<sub>8</sub>-THF, 75.5 MHz, 298 K): δ = 4.1 (SiMe<sub>3</sub>), 10.4, 10.7, 10.8, and 10.9 (NHC-NCMe), 20.6, 20.9, 21.0, 21.5, 22.0, 22.6, 23.5, and 24.6 (NHC-Pr<sup>i</sup>-CH<sub>3</sub>), 25.9, 26.0, 26.2, and 26.8 (Dipp-Pr<sup>i</sup>-CH<sub>3</sub>), 28.1 and 28.5 (Dipp-Pr<sup>i</sup>-CH), 45.6 (PhN-C(H)(Ph)), 53.1, 53.6, 53.7, and 54.0 (NHC-Pr<sup>i</sup>-

CH), 125.6, 125.8, 126.6, and 126.8 (NHC-NCMe), 116.6, 119.3, 122.3, 124.1, 124.4, 124.5, 124.7, 127.8, 127.9, 128.0, 145.0, 147.5, 148.4, 148.7, 150.6, and 153.4 (Ar-C), 188.8 and 191.7 (NHC-C);  $^{29}\text{Si}\{^1\text{H}\}$  NMR ( $\text{D}_8\text{-THF}$ , 80 MHz, 298 K):  $\delta = 2.4$  ( $\text{SiMe}_3$ ),  $-65.4$  ( $\text{Ni-C(H)(Ph)-N(Ph)-Si}$ ); anal. calcd. for  $\text{C}_{50}\text{H}_{77}\text{ClNi}_6\text{Si}_2$ : C, 65.81 %; H, 8.51 %; N, 9.21 %; found: C, 64.65 %; H, 8.35 %; N, 9.12 %.

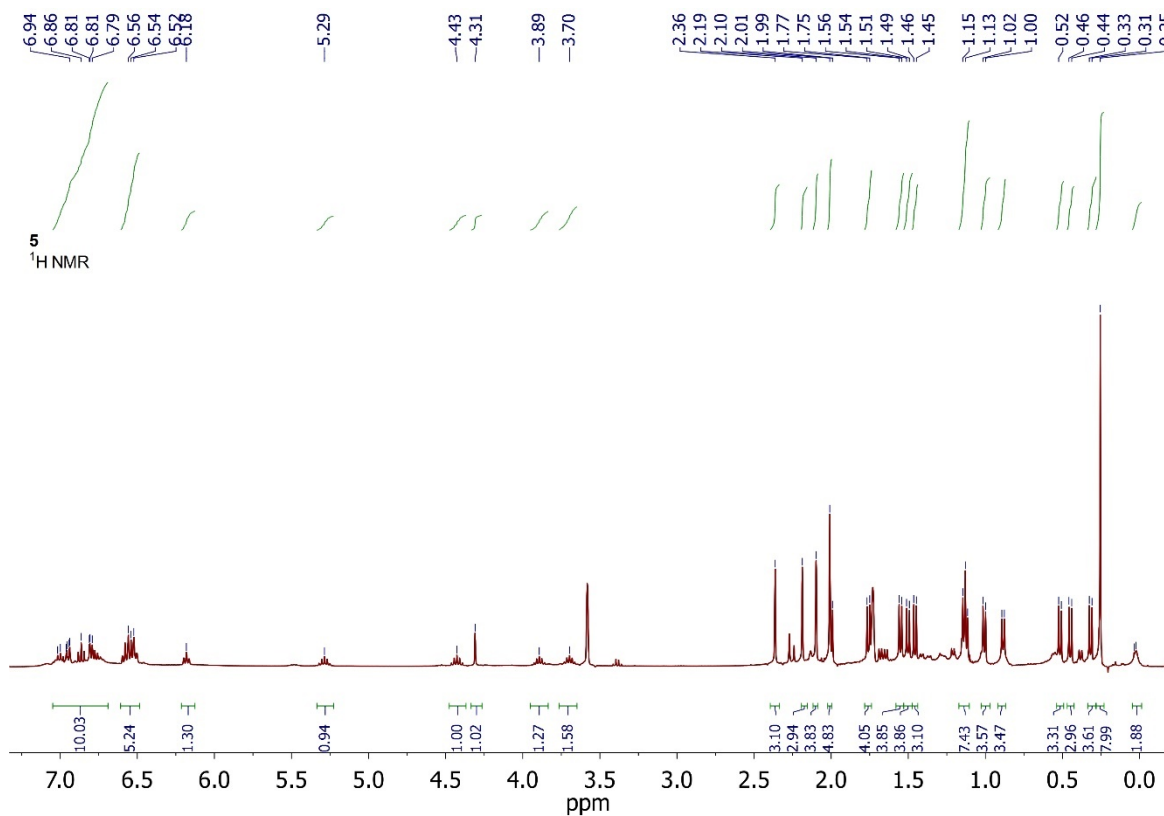

**Figure S10.**  $^1\text{H}$  NMR spectrum of **5** dissolved in  $\text{D}_8\text{-THF}$ , at 298K.

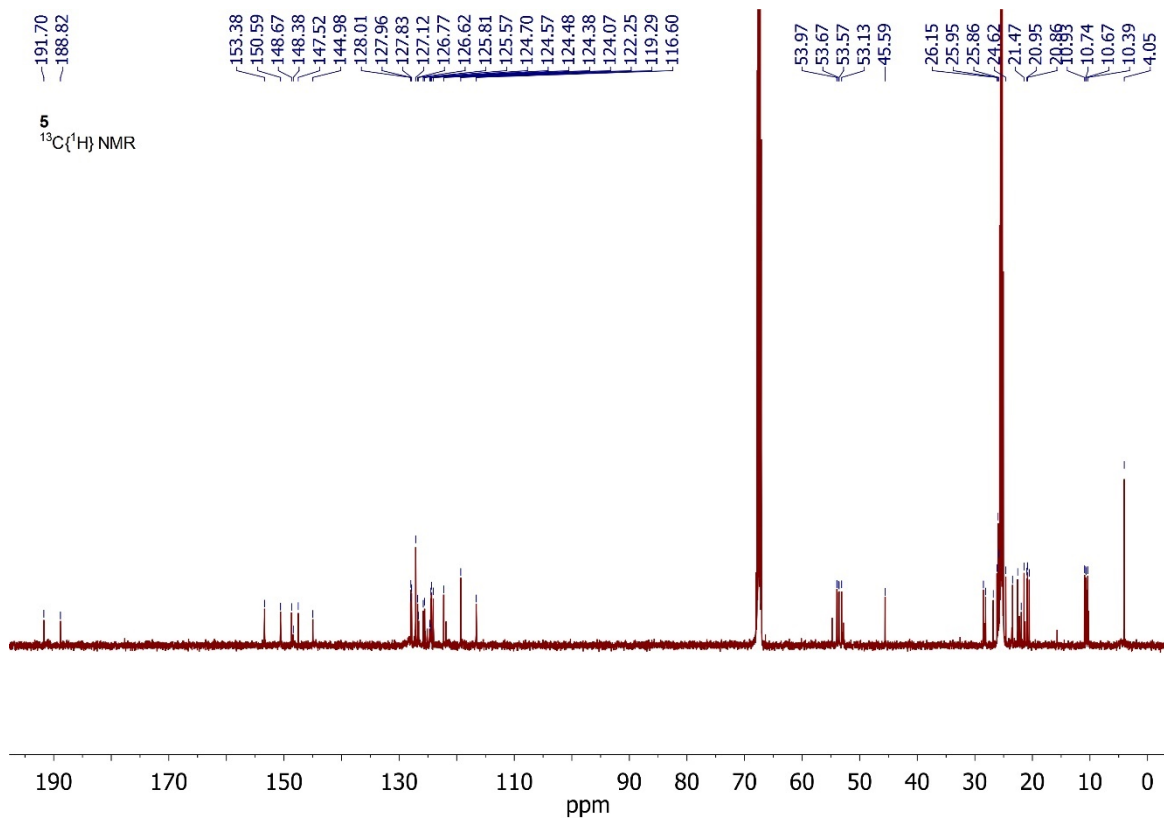

**Figure S11.**  $^{13}\text{C}\{^1\text{H}\}$  NMR spectrum of **5** dissolved in  $\text{D}_8$ -THF, at 298K.

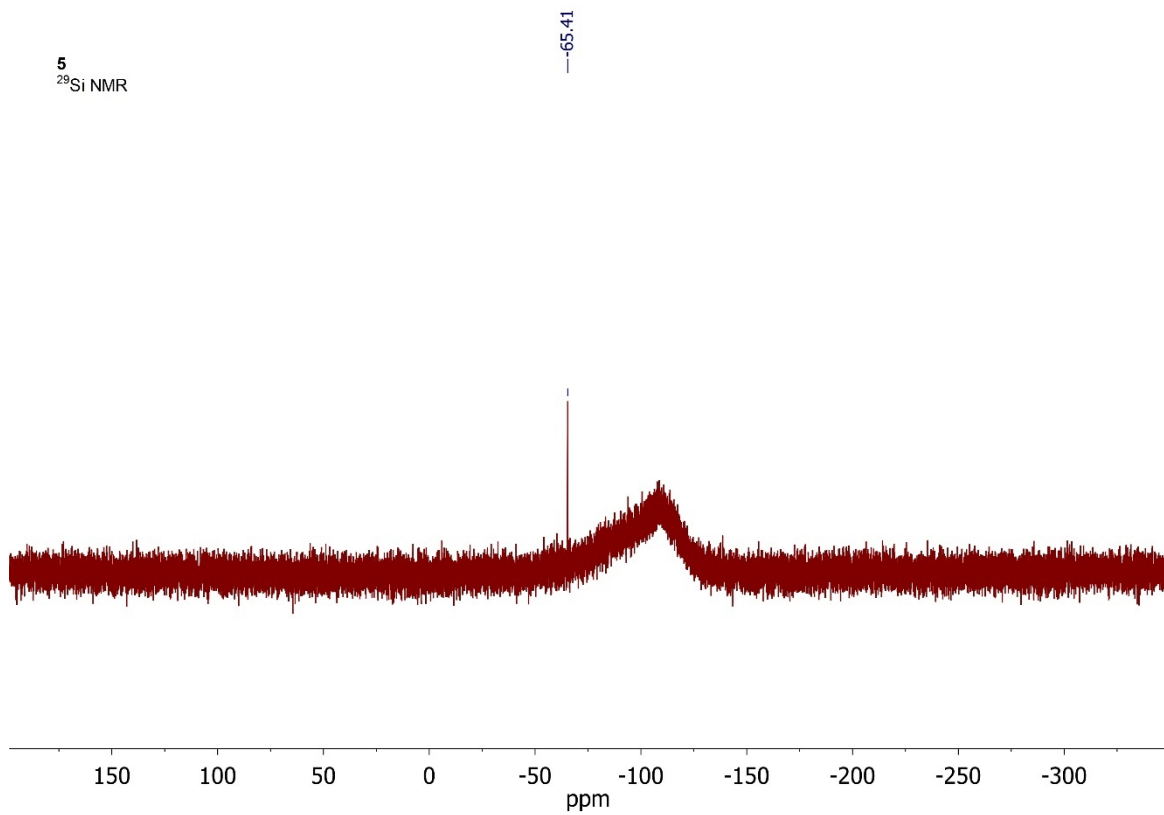

**Figure S12.**  $^{29}\text{Si}\{^1\text{H}\}$  NMR spectrum of **5** dissolved in  $\text{D}_8$ -THF, at 298K.

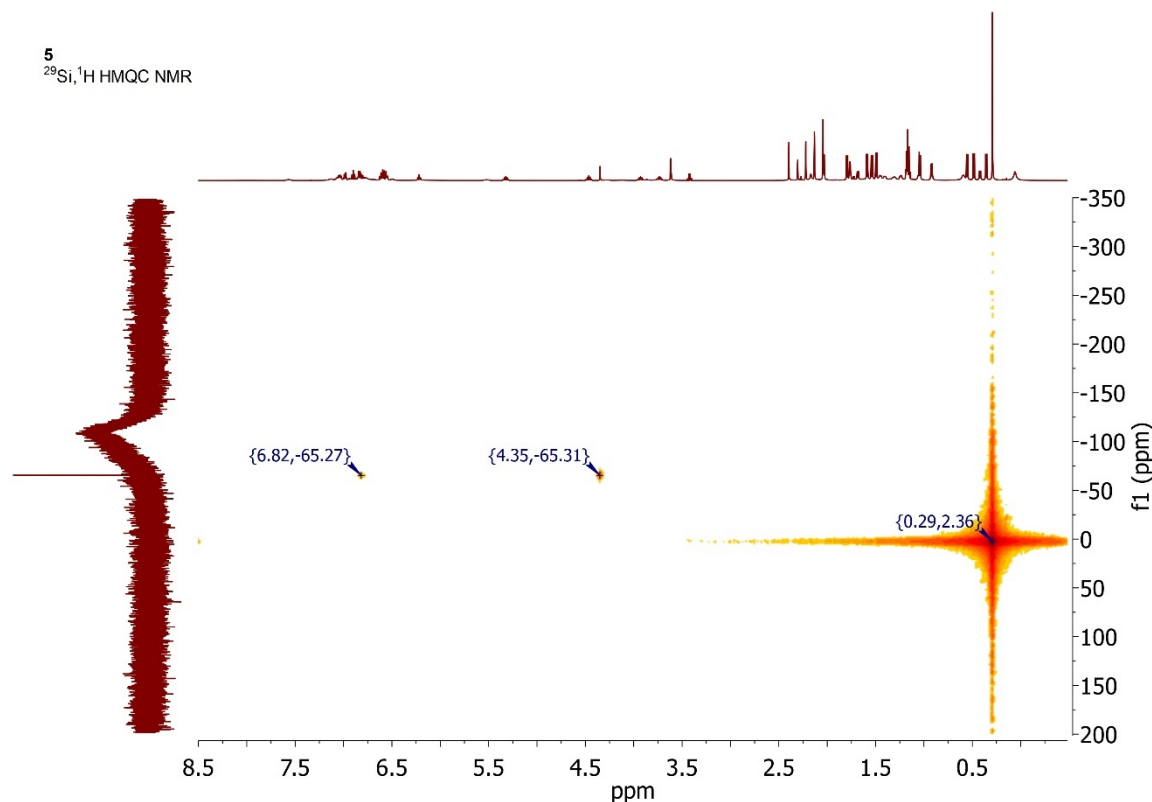

**Figure S13.** <sup>29</sup>Si, <sup>1</sup>H HMQC NMR spectrum of **5** dissolved in D<sub>8</sub>-THF, at 298K.

**Synthesis of 6.** A solution of **1** (0.15 g, 0.21 mmol) in toluene (10 mL) was cooled to -78 °C, and the atmosphere of the reaction vessel exchanged for acetylene. The color of the reaction mixture immediately became yellow, whereupon the atmosphere of the flask was exchanged for nitrogen gas through several vacuum cycles. If excess acetylene is not entirely removed from the reaction, insoluble dark purple material is formed upon warming the reaction mixture. The reaction mixture was subsequently warmed to ambient temperature, and all volatiles removed *in vacuo*. The yellow residue was extracted in warm hexane (15 mL), filtered, and concentrated to 5 mL. Storage of this solution at ambient temperature for one day resulted in the formation of a small crop of yellow crystals of **6** (90 mg, 59 %). <sup>1</sup>H NMR (C<sub>6</sub>D<sub>6</sub>, 400 MHz, 298 K): δ = 0.39 (s, 9H, SiMe<sub>3</sub>), 0.74 (d, <sup>3</sup>J<sub>HH</sub> = 7.2 Hz, 3H, NHC-Pr<sup>i</sup>-CH<sub>3</sub>), 0.85 (d, <sup>3</sup>J<sub>HH</sub> = 7.2 Hz, 3H, NHC-Pr<sup>i</sup>-CH<sub>3</sub>), 1.18 (d, <sup>3</sup>J<sub>HH</sub> = 7.2 Hz, 3H, NHC-Pr<sup>i</sup>-CH<sub>3</sub>), 1.12 (d, <sup>3</sup>J<sub>HH</sub> = 7.2 Hz, 3H, NHC-Pr<sup>i</sup>-CH<sub>3</sub>), 1.25 (virt. t, <sup>3</sup>J<sub>HH</sub> = 7.2 Hz, 6H, NHC-Pr<sup>i</sup>-CH<sub>3</sub>), 1.43 (d, <sup>3</sup>J<sub>HH</sub> = 7.2 Hz, 3H, NHC-Pr<sup>i</sup>-CH<sub>3</sub>), 1.44 (d, <sup>3</sup>J<sub>HH</sub> = 6.8 Hz, 3H, Dipp-Pr<sup>i</sup>-CH<sub>3</sub>), 1.46 (d, <sup>3</sup>J<sub>HH</sub> = 6.8 Hz, 3H, Dipp-Pr<sup>i</sup>-CH<sub>3</sub>), 1.53 (d, <sup>3</sup>J<sub>HH</sub> = 6.8 Hz, 3H, Dipp-Pr<sup>i</sup>-CH<sub>3</sub>), 1.62 (s, 3H, NHC-NCMe), 1.65 (d, <sup>3</sup>J<sub>HH</sub> = 6.8 Hz, 3H, Dipp-Pr<sup>i</sup>-CH<sub>3</sub>), 1.70 (s, 3H, NHC-NCMe), 1.72 (s, 3H, NHC-NCMe), 1.76 (d, <sup>3</sup>J<sub>HH</sub> = 7.2 Hz, 3H, NHC-Pr<sup>i</sup>-CH<sub>3</sub>), 1.80 (s, 3H, NHC-NCMe), 4.15 (sept, <sup>3</sup>J<sub>HH</sub> = 6.8 Hz, 1H, Dipp-Pr<sup>i</sup>-CH), 4.40 (sept, <sup>3</sup>J<sub>HH</sub> = 6.8 Hz, 1H, Dipp-Pr<sup>i</sup>-CH), 5.73 (sept, <sup>3</sup>J<sub>HH</sub> = 7.2 Hz, 1H, NHC-Pr<sup>i</sup>-CH), 5.90 (sept, <sup>3</sup>J<sub>HH</sub> = 7.2 Hz, 1H, NHC-Pr<sup>i</sup>-CH), 5.97 (sept, <sup>3</sup>J<sub>HH</sub> = 7.2 Hz, 1H, NHC-Pr<sup>i</sup>-CH), 6.61 (sept, <sup>3</sup>J<sub>HH</sub> = 7.2 Hz, 1H, NHC-Pr<sup>i</sup>-CH), 7.19 (m, 1H, *p*-Ar-CH), 7.27 (m, 2H, *m*-Ar-CH), 7.73 (d, <sup>3</sup>J<sub>HH</sub> = 12.50 Hz, 1H, Si-C(H)=C(H)-Ni), 8.25 (d, <sup>3</sup>J<sub>HH</sub> = 12.50 Hz, 1H, Si-C(H)=C(H)-Ni); <sup>13</sup>C{<sup>1</sup>H} NMR (C<sub>6</sub>D<sub>6</sub>, 75.5 MHz, 298 K): δ = 3.4 (SiMe<sub>3</sub>), 10.1, 10.2, 10.4 and 10.5 (NHC-NCMe), 21.1, 21.5, 21.6, 21.7, 22.2, 22.4, 23.2, and 24.3

(NHC-Pr<sup>i</sup>-CH<sub>3</sub>), 25.4, 25.8, 26.5, and 26.6 (Dipp-Pr<sup>i</sup>-CH<sub>3</sub>), 28.1 and 28.2 (Dipp-Pr<sup>i</sup>-CH), 52.2, 52.5, 52.6, and 52.7 (NHC-Pr<sup>i</sup>-CH), 124.2 and 124.3 (4 overlapping peaks, NHC-NOMe), 123.6, 124.8, 125.7, 144.4, 147.3, and 148.8 (Ar-C), 169.1 and 171.2 (Si-C(H)=C(H)-Ni), 190.8 and 194.6 (NHC-C); <sup>29</sup>Si{<sup>1</sup>H} NMR (C<sub>6</sub>D<sub>6</sub>, 80 MHz, 298 K): δ = 2.3 (SMe<sub>3</sub>), -59.8 (Si-C(H)=C(H)-Ni); anal. calcd. for C<sub>39</sub>H<sub>68</sub>ClN<sub>5</sub>NiSi<sub>2</sub>: C, 61.85 %; H, 9.05 %; N, 9.25 %; found: C, 61.45 %; H, 8.85 %; N, 9.07 %.

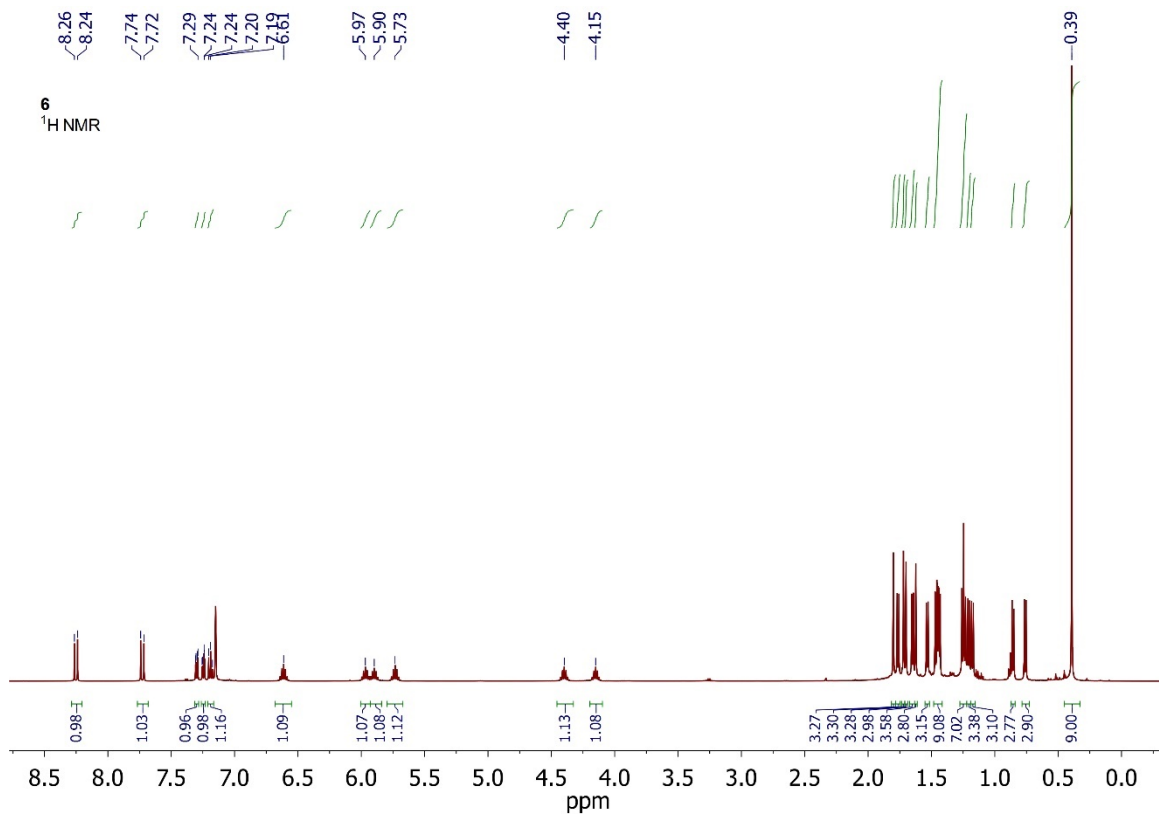

**Figure S14.** <sup>1</sup>H NMR spectrum of **6** dissolved in C<sub>6</sub>D<sub>6</sub>, at 298K.

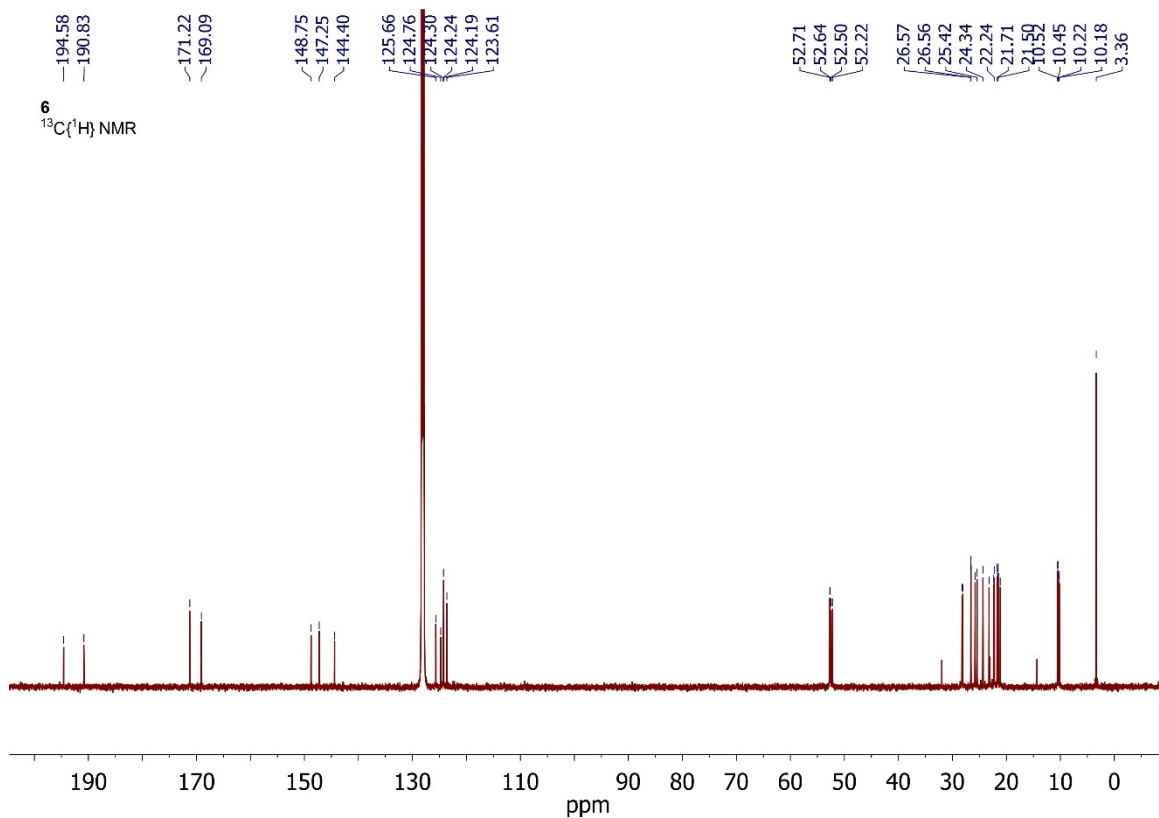

**Figure S15.**  $^{13}\text{C}\{^1\text{H}\}$  NMR spectrum of **6** dissolved in  $\text{C}_6\text{D}_6$ , at 298K.

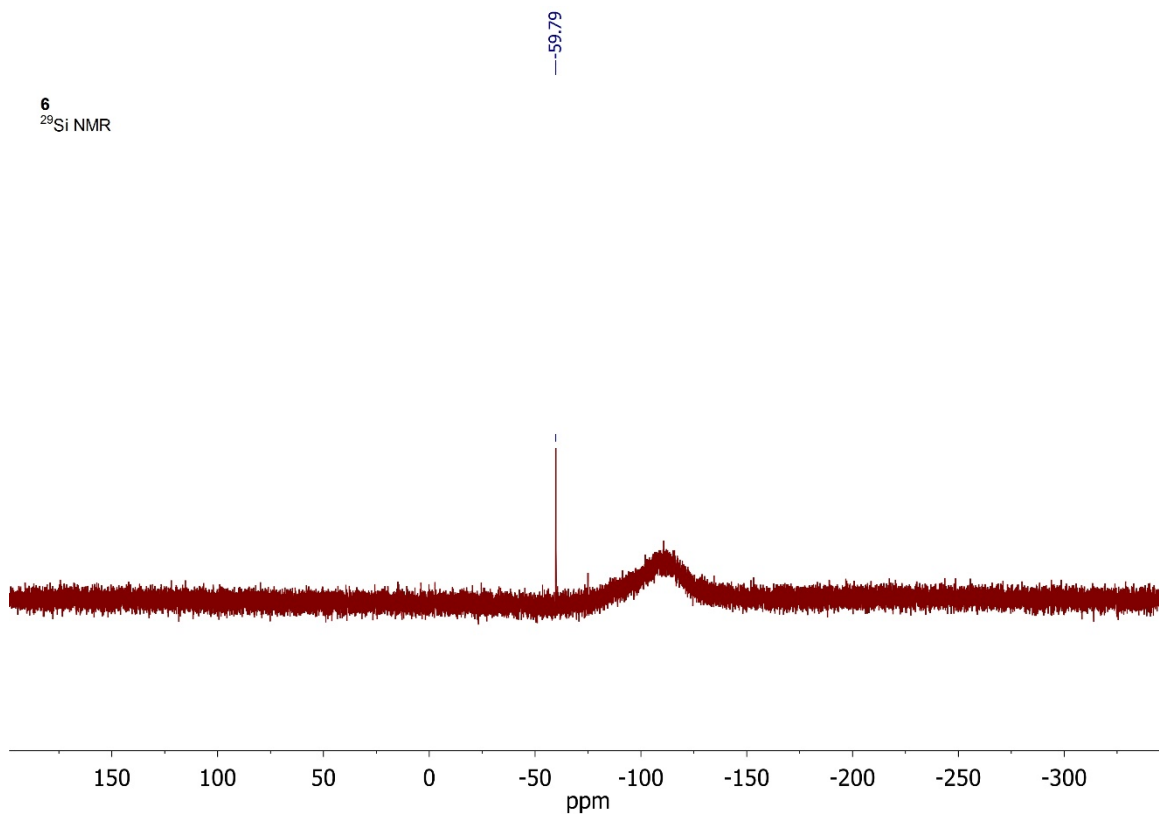

**Figure S16.**  $^{29}\text{Si}\{^1\text{H}\}$  NMR spectrum of **6** dissolved in  $\text{C}_6\text{D}_6$ , at 298K.

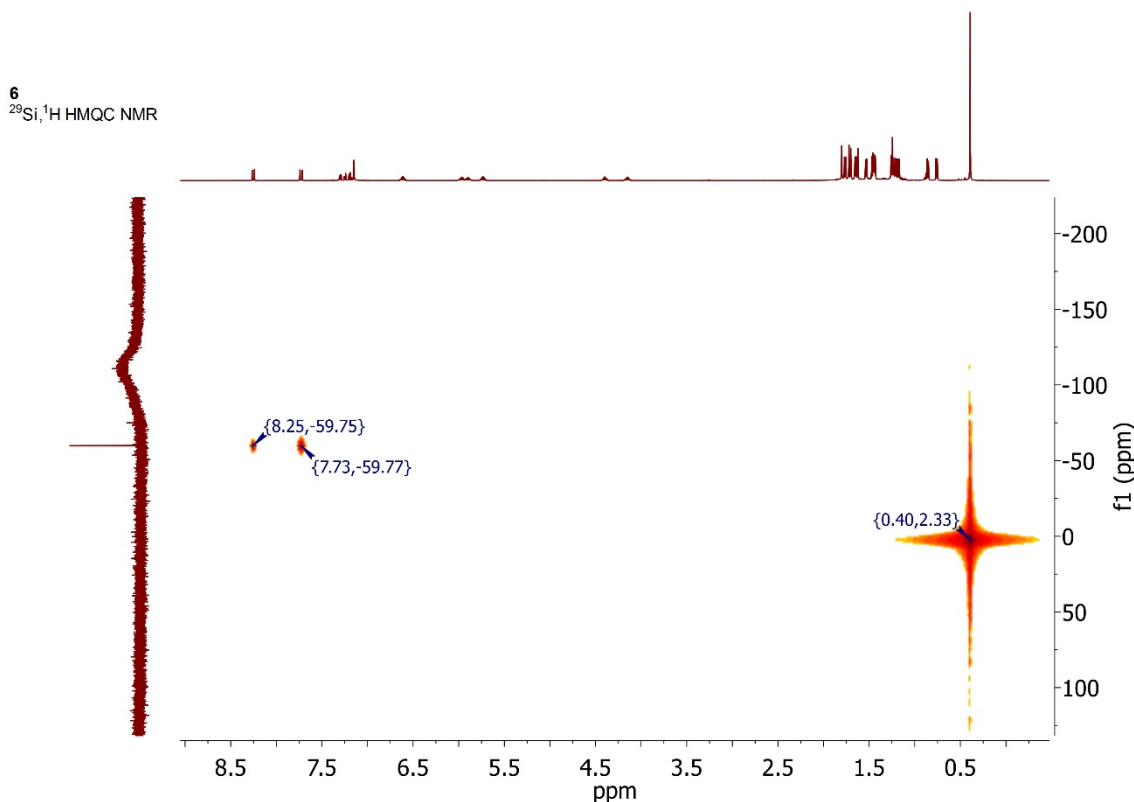

**Figure S17.**  $^{29}\text{Si}, ^1\text{H}$  HMQC NMR spectrum of **6** dissolved in  $\text{C}_6\text{D}_6$ , at 298K.

**Synthesis of 6-OMe.** To a solution of **1** (0.15 g, 0.21 mmol) in toluene (10 mL) was added 1,4-dimethoxy-2-butyne added *via* pipette (27  $\mu\text{L}$ , 0.21 mmol) at ambient temperature. After stirring for 1 h, a color change to bright orange was observed. All volatiles were subsequently removed from the reaction mixture *in vacuo*, the solid residue extracted in hexane (10 mL), and filtered. Concentration of this solution to 5 mL and storage at 4  $^\circ\text{C}$  overnight resulted in the formation of large crop of orange crystals of **6-OMe** (85 mg, 49 %).  $^1\text{H}$  NMR ( $\text{C}_6\text{D}_6$ , 400 MHz, 298 K):  $\delta$  = 0.28 (s, 9H,  $\text{SiMe}_3$ ), 0.76 (br dd, 6H,  $\text{NHC-Pr}^i\text{-CH}_3$ ), 1.32 (br, 6H,  $\text{NHC-Pr}^i\text{-CH}_3$ ), 1.38 (d,  $^3\text{J}_{\text{HH}} = 7.2$  Hz, 3H,  $\text{NHC-Pr}^i\text{-CH}_3$ ), 1.41 (d,  $^3\text{J}_{\text{HH}} = 6.8$  Hz, 3H,  $\text{Dipp-Pr}^i\text{-CH}_3$ ), 1.43 (d,  $^3\text{J}_{\text{HH}} = 6.8$  Hz, 3H,  $\text{Dipp-Pr}^i\text{-CH}_3$ ), 1.46 (d,  $^3\text{J}_{\text{HH}} = 6.8$  Hz, 3H,  $\text{Dipp-Pr}^i\text{-CH}_3$ ), 1.50 (br, 3H,  $\text{NHC-Pr}^i\text{-CH}_3$ ), 1.59 (br, 3H,  $\text{NHC-Pr}^i\text{-CH}_3$ ), 1.62 (d,  $^3\text{J}_{\text{HH}} = 7.2$  Hz, 3H,  $\text{NHC-Pr}^i\text{-CH}_3$ ), 1.68 (s, 3H,  $\text{NHC-NCMe}$ ), 1.69 (d,  $^3\text{J}_{\text{HH}} = 6.8$  Hz, 3H,  $\text{Dipp-Pr}^i\text{-CH}_3$ ), 1.73 (s, 6H,  $\text{NHC-NCMe}$ ), 1.80 (s, 3H,  $\text{NHC-NCMe}$ ), 3.12 (s, 3H,  $\text{CH}_2\text{-OMe}$ ), 3.41 (s, 3H,  $\text{CH}_2\text{-OMe}$ ), 3.81 (m, 1H,  $\text{CH}_2\text{-OMe}$ ), 3.94 (m, 1H,  $\text{CH}_2\text{-OMe}$ ), 3.96 (sept,  $^3\text{J}_{\text{HH}} = 6.8$  Hz, 2H,  $\text{Dipp-Pr}^i\text{-CH}$ ), 4.51 (sept,  $^3\text{J}_{\text{HH}} = 6.8$  Hz, 2H,  $\text{Dipp-Pr}^i\text{-CH}$ ), 5.37 (br, 1H,  $\text{NHC-Pr}^i\text{-CH}$ ), 5.94 (br, 1H,  $\text{NHC-Pr}^i\text{-CH}$ ), 6.49 (br, 1H,  $\text{NHC-Pr}^i\text{-CH}$ ), 6.93 (br, 1H,  $\text{NHC-Pr}^i\text{-CH}$ ), 7.20 (m, 2H, *m*-Ar-CH), 7.29 (m, 1H, *p*-Ar-CH);  $^{13}\text{C}\{^1\text{H}\}$  NMR ( $\text{C}_6\text{D}_6$ , 75.5 MHz, 298 K):  $\delta$  = 2.6 ( $\text{SiMe}_3$ ), 9.8, 9.9, 10.1 (4 signals,  $\text{NHC-NCMe}$ ), 20.8, 21.0, 21.3, 21.5, 21.7, 21.9, 22.5, and 22.6 ( $\text{NHC-Pr}^i\text{-CH}_3$ ), 25.2, 25.6, 25.7, and 26.6 ( $\text{Dipp-Pr}^i\text{-CH}_3$ ), 27.7 and 27.8 ( $\text{Dipp-Pr}^i\text{-CH}$ ), 51.6, 52.0, 52.3, and 52.6 ( $\text{NHC-Pr}^i\text{-CH}$ ), 57.1 and 57.4 ( $\text{CH}_2\text{OMe}$ ), 69.8 and 77.6 ( $\text{CH}_2\text{OMe}$ ), 123.0 and 125.0 ( $\text{NHC-NCMe}$ ), 123.6, 124.1, 124.4, 124.6, 142.5, 145.0, 147.3, and 147.8 (Ar-C), 182.7 and 191.7 ( $\text{MeOCH}_2\text{C}=\text{CCH}_2\text{OMe}$ ), 192.7 ( $\text{NHC-C}$ );  $^{29}\text{Si}\{^1\text{H}\}$  NMR ( $\text{C}_6\text{D}_6$ , 80 MHz, 298 K):  $\delta$  = 2.2 ( $\text{SiMe}_3$ ), -63.3 ( $\text{Si-C}=\text{C-Ni}$ ); anal. calcd. for  $\text{C}_{43}\text{H}_{76}\text{ClN}_5\text{NiO}_2\text{Si}_2$ : C, 61.09 %; H, 9.06 %; N, 8.28 %; found: C, 61.01 %; H, 8.14%; N, 8.91 %.

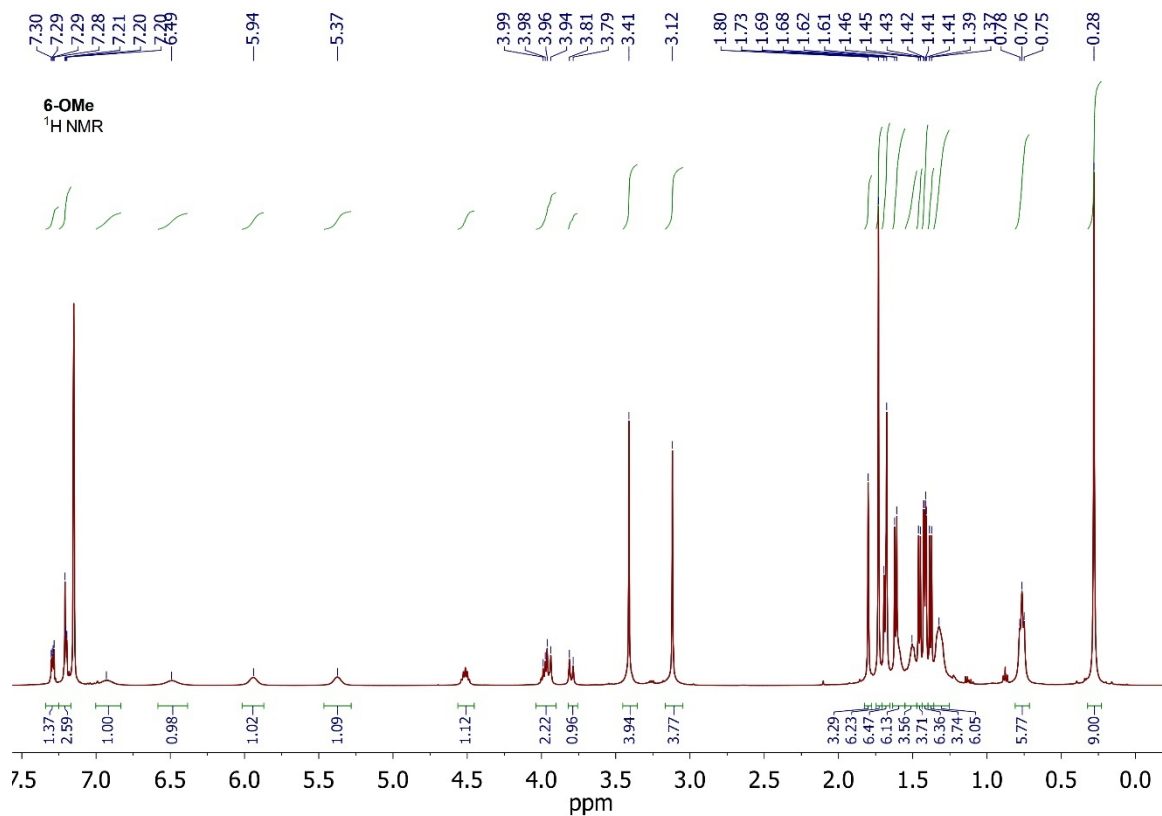

**Figure S18.** <sup>1</sup>H NMR spectrum of **6-OMe** dissolved in C<sub>6</sub>D<sub>6</sub>, at 298K.

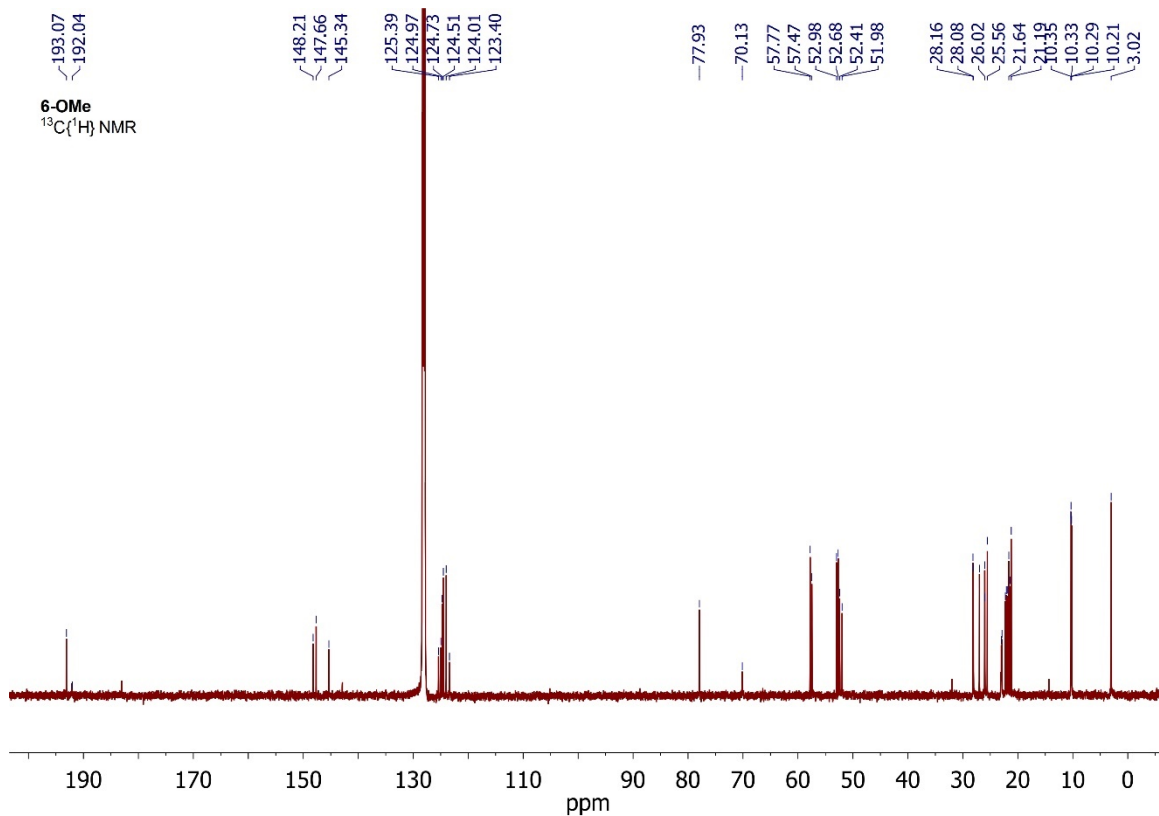

**Figure S19.** <sup>13</sup>C{<sup>1</sup>H} NMR spectrum of **6-OMe** dissolved in C<sub>6</sub>D<sub>6</sub>, at 298K.



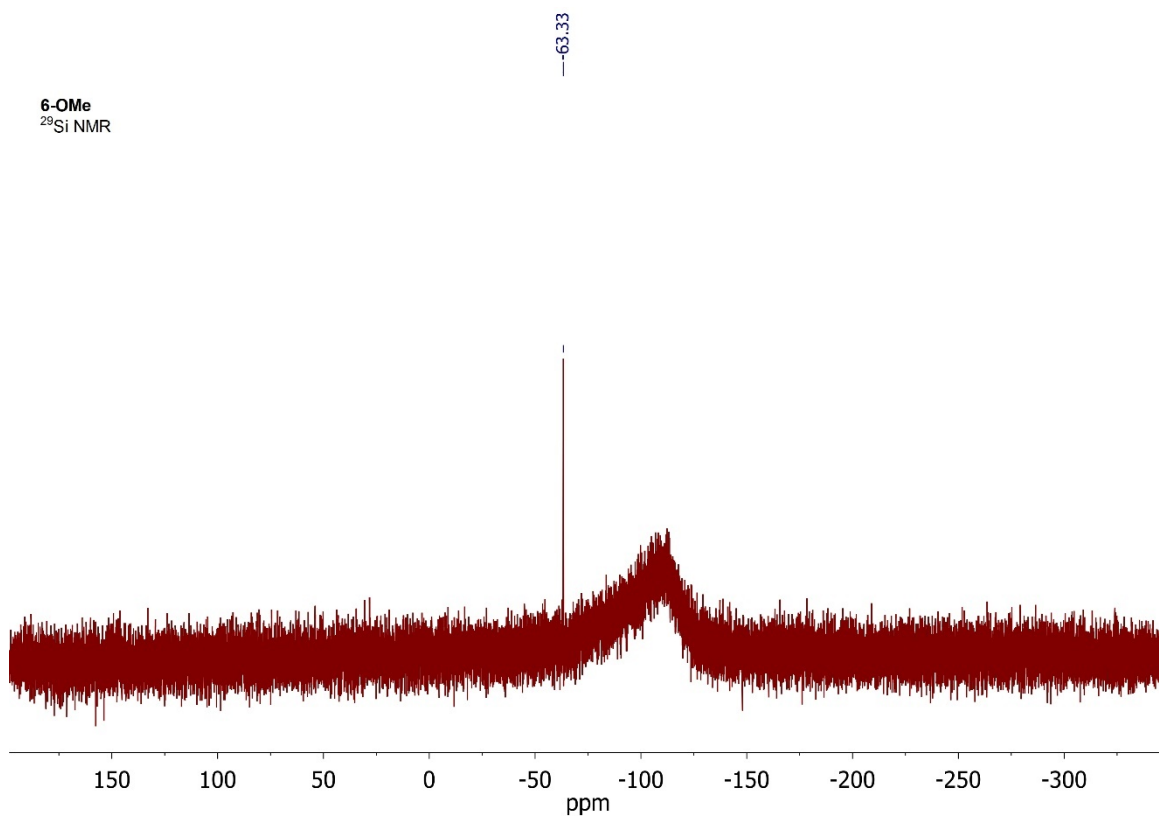

Figure S20. <sup>29</sup>Si{<sup>1</sup>H} NMR spectrum of **6-OMe** dissolved in C<sub>6</sub>D<sub>6</sub>, at 298K.

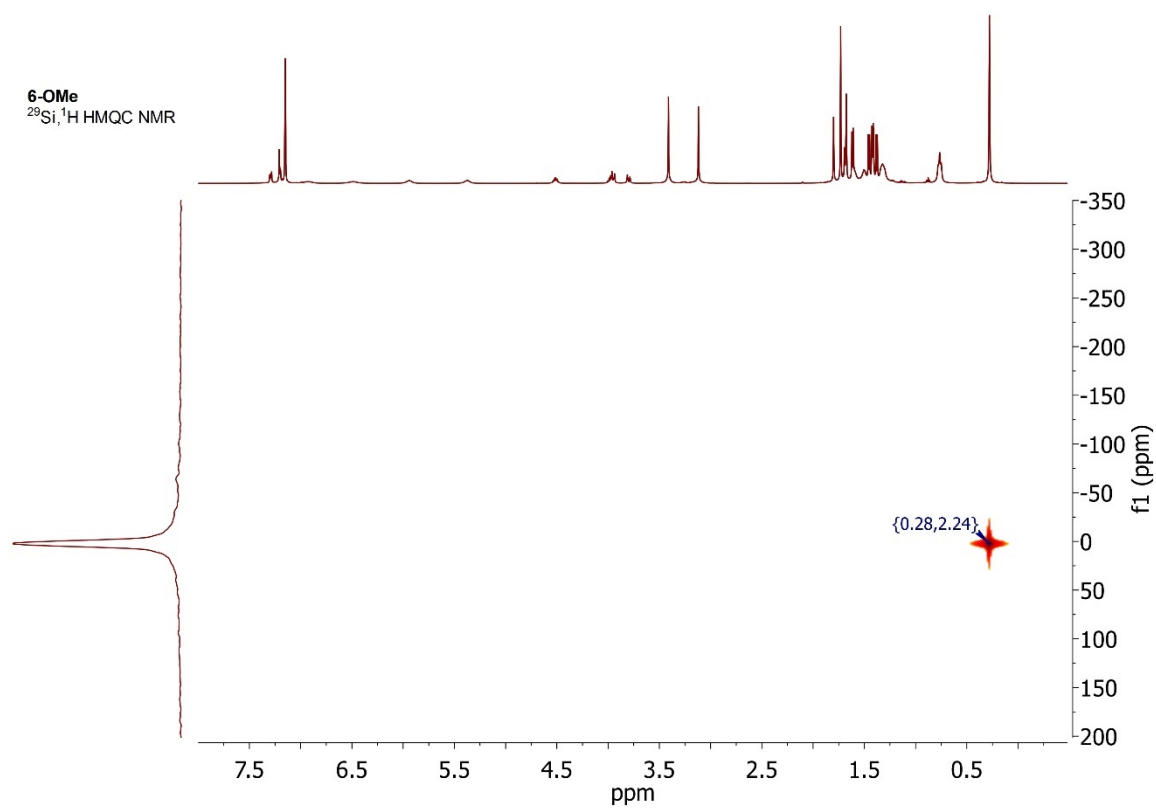

Figure S21. <sup>29</sup>Si, <sup>1</sup>H HMQC NMR spectrum of **6-OMe** dissolved in C<sub>6</sub>D<sub>6</sub>, at 298K.

**Synthesis of 7.** A solution of **1** (0.15 g, 0.21 mmol) in diethyl ether (25 mL) was cooled to -78 °C, and treated with an atmosphere of ethylene. The color of the reaction mixture immediately became yellow, whereupon the atmosphere of the flask was exchanged for nitrogen gas through several vacuum cycles. The solution was warmed to 0 °C, filtered into a precooled Schlenk flask, and concentrated to ~10 mL by blowing a stream of nitrogen gas over the solution. The reaction mixture was stored at -30 °C overnight to yield a small crop of yellow plate-like crystals (45 mg, 29 %).  $^1\text{H}$  NMR ( $\text{D}_8\text{-THF}$ , 400 MHz, 298 K):  $\delta$  = -0.06 (s, 9H,  $\text{SiMe}_3$ ), 0.57 (m, 2H,  $\text{Ni-CH}_2\text{CH}_2\text{-Si}$ ), 0.80 (d,  $^3J_{\text{HH}}$  = 6.8 Hz, 3H,  $\text{Dipp-Pr}^i\text{-CH}_3$ ), 0.95 (d,  $^3J_{\text{HH}}$  = 6.8 Hz, 3H,  $\text{Dipp-Pr}^i\text{-CH}_3$ ), 1.06 (d,  $^3J_{\text{HH}}$  = 6.8 Hz, 3H,  $\text{Dipp-Pr}^i\text{-CH}_3$ ), 1.19 (overlapping d, 6H,  $\text{NHC-}i\text{Pr-CH}_3$ ), 1.34 (d,  $^3J_{\text{HH}}$  = 6.8 Hz, 3H,  $\text{Dipp-Pr}^i\text{-CH}_3$ ), 1.34 (m, 2H,  $\text{Ni-CH}_2\text{CH}_2\text{-Si}$ ) 1.38 (d,  $^3J_{\text{HH}}$  = 6.8 Hz, 3H,  $\text{Dipp-Pr}^i\text{-CH}_3$ ), 1.50 (d,  $^3J_{\text{HH}}$  = 7.2 Hz, 6H,  $\text{NHC-Pr}^i\text{-CH}_3$ ), 1.53 (d,  $^3J_{\text{HH}}$  = 7.2 Hz, 6H,  $\text{NHC-Pr}^i\text{-CH}_3$ ), 1.66 (d,  $^3J_{\text{HH}}$  = 7.2 Hz, 3H,  $\text{Dipp-Pr}^i\text{-CH}_3$ ), 2.10 (s, 6H,  $\text{NHC-NCMe}$ ), 2.19 (s, 6H,  $\text{NHC-NCMe}$ ), 2.21 (s, 6H,  $\text{NHC-NCMe}$ ), 3.79 (sept,  $^3J_{\text{HH}}$  = 6.8 Hz, 1H,  $\text{Dipp-Pr}^i\text{-CH}$ ), 3.91 (sept,  $^3J_{\text{HH}}$  = 6.8 Hz, 2H,  $\text{Dipp-Pr}^i\text{-CH}$ ), 5.50 (sept,  $^3J_{\text{HH}}$  = 7.2 Hz, 1H,  $\text{NHC-Pr}^i\text{-CH}$ ), 5.57 (sept,  $^3J_{\text{HH}}$  = 7.2 Hz, 1H,  $\text{NHC-Pr}^i\text{-CH}$ ), 6.31 (sept,  $^3J_{\text{HH}}$  = 7.2 Hz, 1H,  $\text{NHC-Pr}^i\text{-CH}$ ), 6.78 (sept,  $^3J_{\text{HH}}$  = 7.2 Hz, 1H,  $\text{NHC-Pr}^i\text{-CH}$ ), 6.87 (m, 1H,  $p\text{-Ar-CH}$ ), 6.94 (m, 2H,  $m\text{-Ar-CH}$ );  $^{13}\text{C}\{^1\text{H}\}$  NMR ( $\text{D}_8\text{-THF}$ , 75.5 MHz, 233 K):  $\delta$  = 1.7 ( $\text{Ni-CH}_2\text{CH}_2\text{-Si}$ ), 3.2 ( $\text{SiMe}_3$ ), 10.3, 10.4, 10.6, and 10.8 ( $\text{NHC-NCMe}$ ), 21.0 ( $\text{Ni-CH}_2\text{CH}_2\text{-Si}$ ), 21.2, 21.7, 21.9, 22.0, 22.9, 24.3, 25.9, and 26.0 ( $\text{NHC-Pr}^i\text{-CH}_3$ ), 26.2, 26.8, 28.0, and 28.5 ( $\text{Dipp-Pr}^i\text{-CH}_3$ ), 30.8 (br,  $\text{Dipp-Pr}^i\text{-CH}$ ), 53.0, 53.2, 53.3, and 53.4 ( $\text{NHC-Pr}^i\text{-CH}$ ), 123.5, 124.0, 124.7, and 126.7 ( $\text{NHC-NCMe}$ ), 123.9, 124.7, 126.7, 144.6, 147.0, and 148.3 ( $\text{Ar-C}$ ), 191.6, and 194.3 ( $\text{NHC-C:}$ );  $^{29}\text{Si}\{^1\text{H}\}$  NMR ( $\text{D}_8\text{-THF}$ , 80 MHz, 298 K):  $\delta$  = 1.8 ( $\text{SiMe}_3$ ), -26.0 ( $\text{Ni-C}_2\text{H}_4\text{-Si}$ ); anal. calcd. for  $\text{C}_{39}\text{H}_{70}\text{ClN}_5\text{NiSi}_2$ : C, 61.69 %; H, 9.29 %; N, 9.22 %; found: C, 62.01 %; H, 9.25%; N, 9.44 %.

N.B. Keeping an NMR sample of **7** at ambient temperature for 24 h results in complete disproportionation to **1** and **9**. However, a few crystals of **8** could be isolated when reacting a hexane solution of **1** with excess ethylene followed by storage at low-temperature for several days, from which a poor-quality structure could be obtained (see below), confirming its connectivity. No further data was obtained for this compound, however.

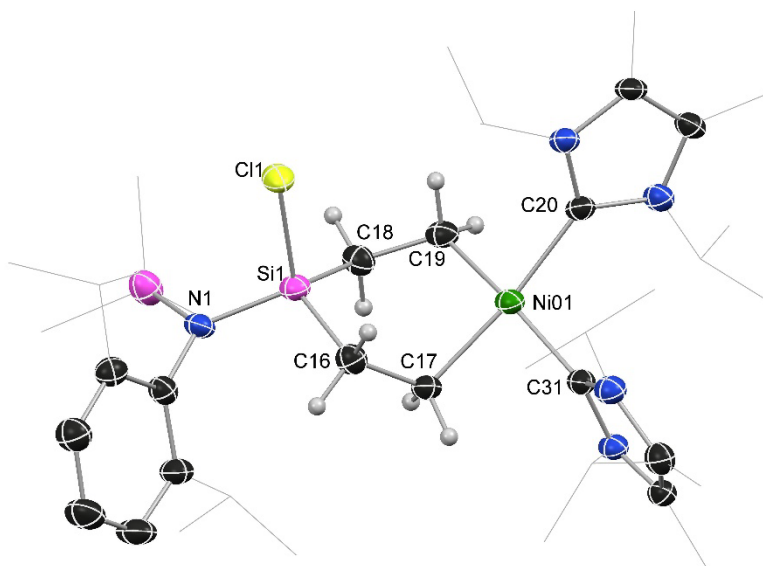

**Figure S22.** Molecular structure of **8**, with thermal ellipsoids at 30% probability.

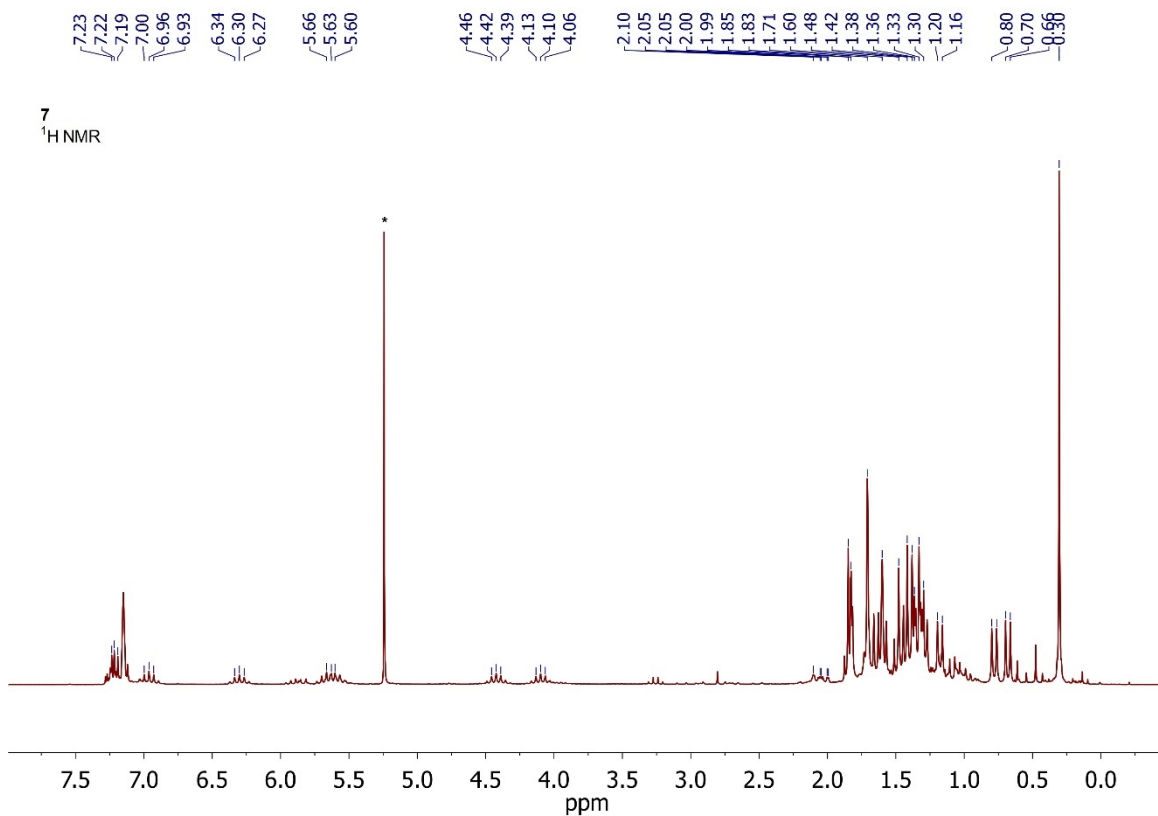

**Figure S23.** <sup>1</sup>H NMR spectrum of **7** dissolved in C<sub>6</sub>D<sub>6</sub>, at 298K. An asterisk indicates excess ethylene, required to prevent regeneration of starting material **1**.

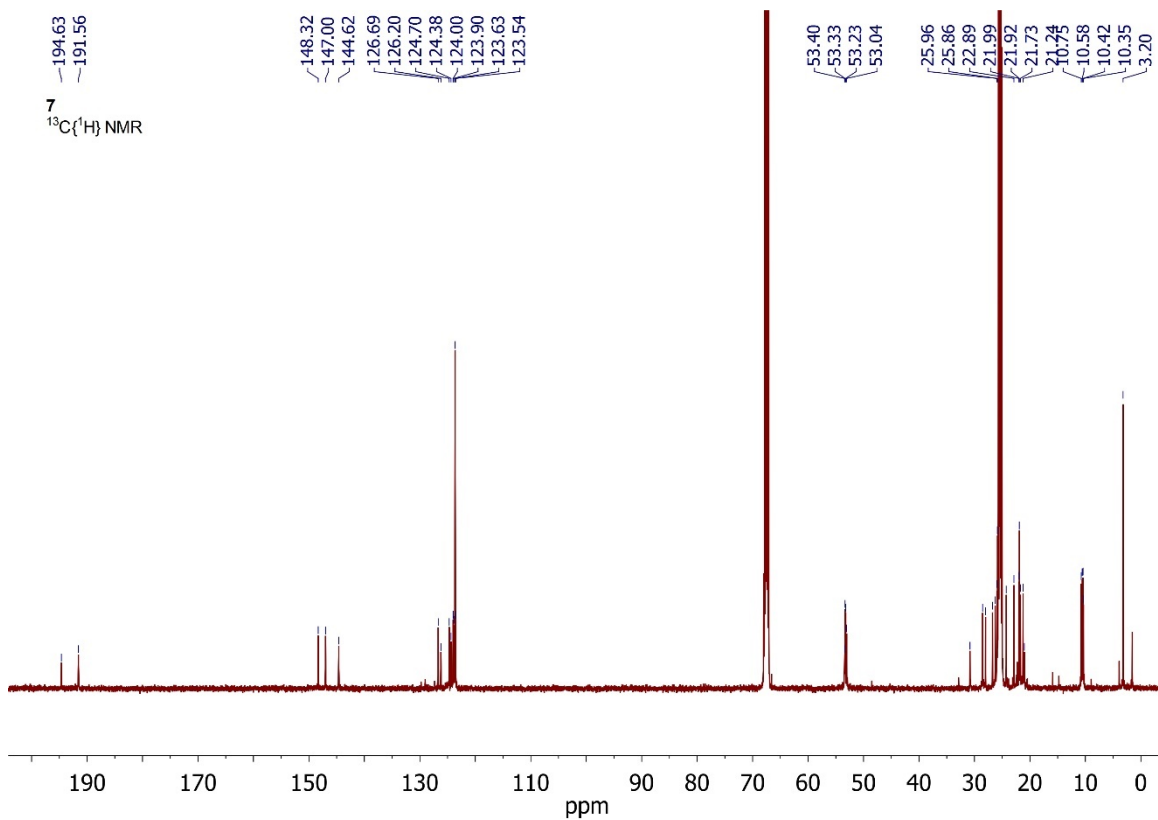

**Figure S24.** <sup>13</sup>C{<sup>1</sup>H} NMR spectrum of **7** dissolved in C<sub>6</sub>D<sub>6</sub>, at 298K.

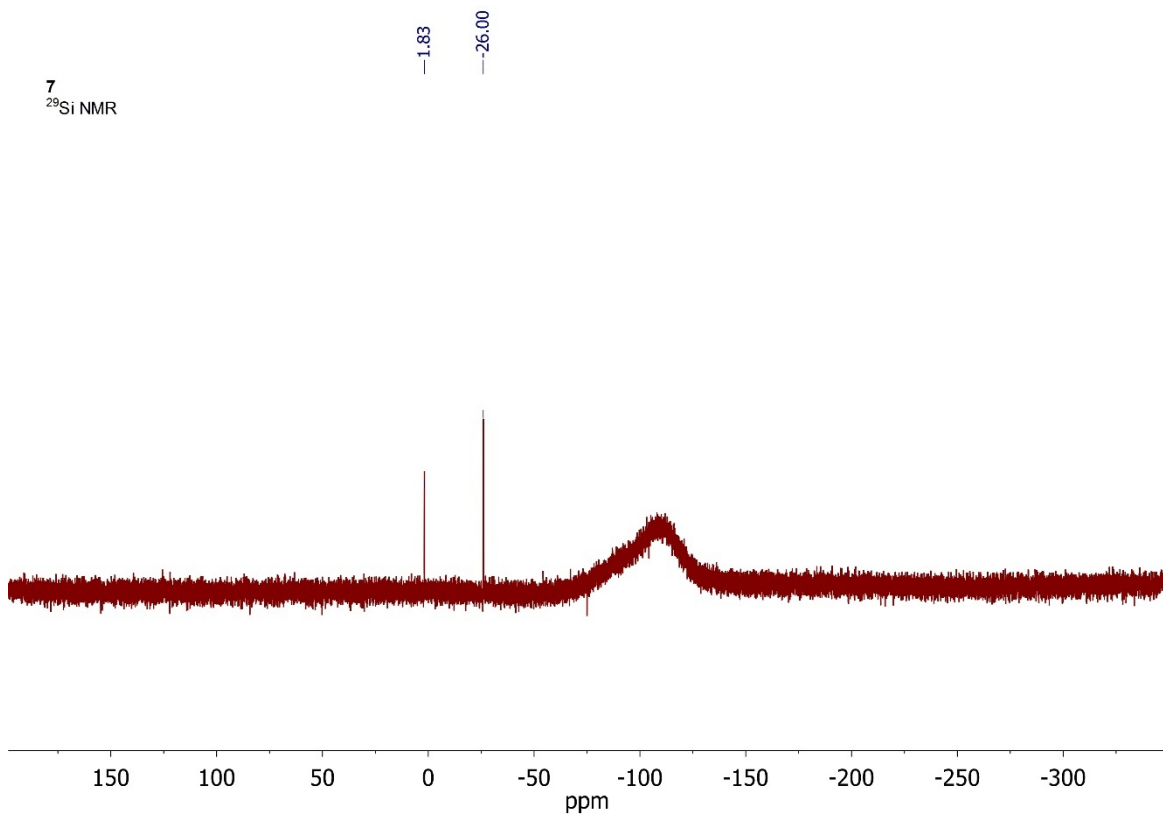

Figure S25.  $^{29}\text{Si}\{^1\text{H}\}$  NMR spectrum of **7** dissolved in  $\text{C}_6\text{D}_6$ , at 298K.

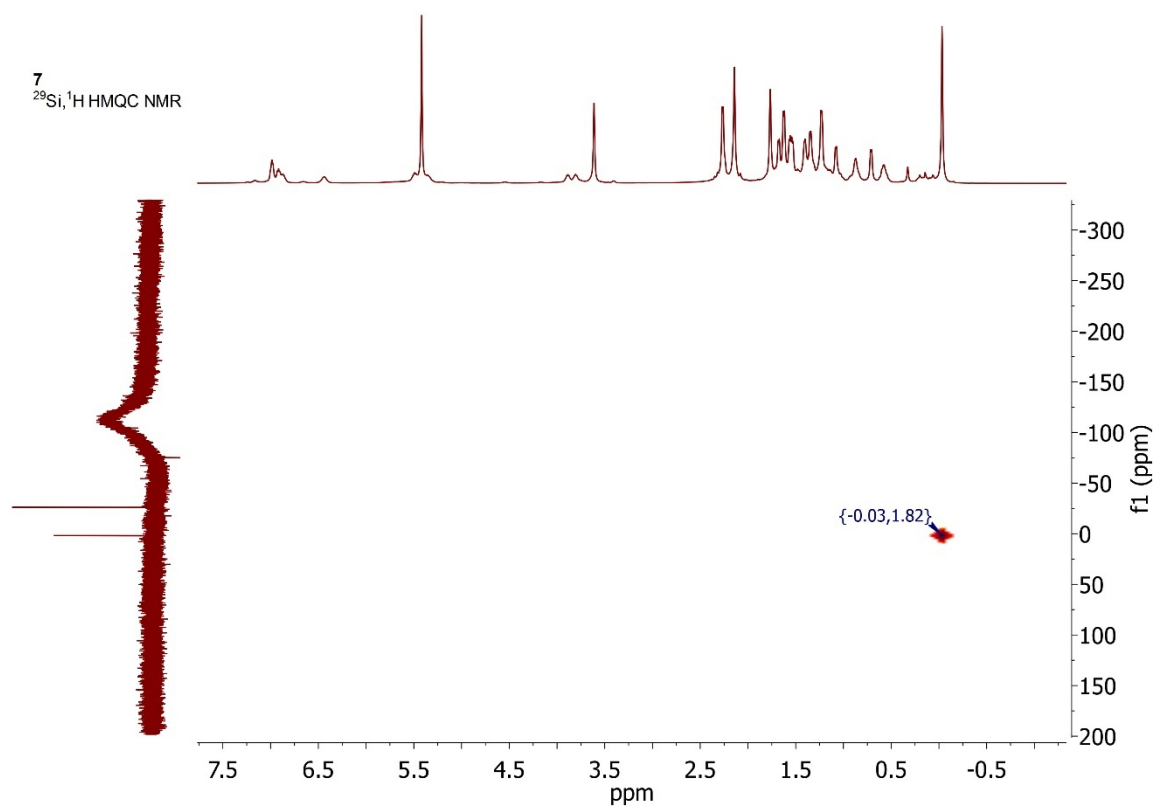

Figure S26.  $^{29}\text{Si}, ^1\text{H}$  HMQC NMR spectrum of **7** dissolved in  $\text{C}_6\text{D}_6$ , at 298K.

**Synthesis of 9.** A solution of **1** (0.15 g, 0.21 mmol) in toluene (10 mL) was stirred under an atmosphere of ethylene for 18 h at ambient temperature, resulting in a pale yellow solution. All volatiles were subsequently removed from the reaction mixture *in vacuo*, the residue extracted in hexane (10 mL), and filtered. Concentration of the filtrate to ~5 mL and storage at ambient temperature overnight resulted in the formation of a large crop of yellow crystalline material. (105 mg, 65 %).  $^1\text{H NMR}$  ( $\text{C}_6\text{D}_6$ , 400 MHz, 298 K):  $\delta$  = 0.50 (m, 1H, Si- $\text{CH}_2\text{CH}_3$ ), 0.57 (m, 3H, Si- $\text{CH}_2\text{CH}_3$ ), 0.65 (s, 9H,  $\text{SiMe}_3$ ), 0.70 (m, 1H, Si- $\text{CH}_2\text{CH}_3$ ), 0.81 (d,  $^3J_{\text{HH}} = 6.8$  Hz, 3H, NHC- $\text{Pr}^i\text{-CH}_3$ ), 1.01 (d,  $^3J_{\text{HH}} = 6.8$  Hz, 3H, NHC- $\text{Pr}^i\text{-CH}_3$ ), 1.12 (m, 1H, Ni-( $\text{H}_2\text{C}=\text{C}(\text{H})\text{Si}$ )), 1.23 (d,  $^3J_{\text{HH}} = 6.8$  Hz, 3H, NHC- $\text{Pr}^i\text{-CH}_3$ ), 1.25 (d,  $^3J_{\text{HH}} = 6.8$  Hz, 3H, NHC- $\text{Pr}^i\text{-CH}_3$ ), 1.38 (d,  $^3J_{\text{HH}} = 6.8$  Hz, 6H, Dipp- $\text{Pr}^i\text{-CH}_3$ ), 1.40 (d,  $^3J_{\text{HH}} = 7.2$  Hz, 6H, NHC- $\text{Pr}^i\text{-CH}_3$ ), 1.44 (d,  $^3J_{\text{HH}} = 7.2$  Hz, 3H, NHC- $\text{Pr}^i\text{-CH}_3$ ), 1.45 (d,  $^3J_{\text{HH}} = 7.2$  Hz, 3H, NHC- $\text{Pr}^i\text{-CH}_3$ ), 1.55 (d,  $^3J_{\text{HH}} = 6.8$  Hz, 6H, Dipp- $\text{Pr}^i\text{-CH}_3$ ), 1.68 (s, 3H, NHC- $\text{NCMe}$ ), 1.74 (s, 3H, NHC- $\text{NCMe}$ ), 1.75 (s, 3H, NHC- $\text{NCMe}$ ), 1.87 (s, 3H, NHC- $\text{NCMe}$ ), 1.95 (m, 1H, Ni-( $\text{H}_2\text{C}=\text{C}(\text{H})\text{Si}$ )), 2.04 (m, 1H, Ni-( $\text{H}_2\text{C}=\text{C}(\text{H})\text{Si}$ )), 4.05 (sept,  $^3J_{\text{HH}} = 6.8$  Hz, 1H, Dipp- $\text{Pr}^i\text{-CH}$ ), 4.25 (sept,  $^3J_{\text{HH}} = 6.8$  Hz, 1H, Dipp- $\text{Pr}^i\text{-CH}$ ), 5.52 (sept,  $^3J_{\text{HH}} = 7.2$  Hz, 1H, NHC- $\text{Pr}^i\text{-CH}$ ), 5.74 (sept,  $^3J_{\text{HH}} = 7.2$  Hz, 1H, NHC- $\text{Pr}^i\text{-CH}$ ), 6.00 (sept,  $^3J_{\text{HH}} = 7.2$  Hz, 1H, NHC- $\text{Pr}^i\text{-CH}$ ), 6.40 (sept,  $^3J_{\text{HH}} = 7.2$  Hz, 1H, NHC- $\text{Pr}^i\text{-CH}$ ), 7.11 (m, 3H, Ar- $\text{CH}$ );  $^{13}\text{C}\{^1\text{H}\}$  NMR ( $\text{C}_6\text{D}_6$ , 75.5 MHz, 298 K):  $\delta$  = 3.7 ( $\text{SiMe}_3$ ), 8.9 (Si- $\text{CH}_2\text{CH}_3$ ), 10.2, 10.3, and 10.4 (NHC- $\text{NCMe}$ ), 12.2 (Si- $\text{CH}_2\text{CH}_3$ ), 21.6, 21.7, 21.9, 22.1, 22.7, 23.4, 24.9, and 25.3 (NHC- $\text{Pr}^i\text{-CH}_3$ ), 25.1 (Ni-( $\text{H}_2\text{C}=\text{C}(\text{H})\text{Si}$ )), 26.5 and 26.6 (Dipp- $\text{Pr}^i\text{-CH}_3$ ), 27.9 (Ni-( $\text{H}_2\text{C}=\text{C}(\text{H})\text{Si}$ )), 30.1 (Dipp- $\text{Pr}^i\text{-CH}$ ), 51.6, 52.1, and 52.5 (NHC- $\text{Pr}^i\text{-CH}$ ), 122.9, 123.1, 123.5, and 123.7 (NHC- $\text{NCMe}$ ), 123.7, 124.6, 124.9, 144.2, 146.8, and 148.2 (Ar- $\text{C}$ ), 202.1 and 202.3 (NHC- $\text{C}$ );  $^{29}\text{Si}\{^1\text{H}\}$  NMR ( $\text{C}_6\text{D}_6$ , 80 MHz, 298 K):  $\delta$  = 5.2 ( $\text{SiMe}_3$ ), 7.8 ( $^{\text{TMS}}\text{L}(\text{Cl})\text{SiEt}$ ); anal. calcd. for  $\text{C}_{41}\text{H}_{74}\text{ClN}_5\text{NiSi}_2$ : C, 62.54 %; H, 9.47 %; N, 8.89 %; found: C, 62.18 %; H, 9.29%; N, 8.66 %.

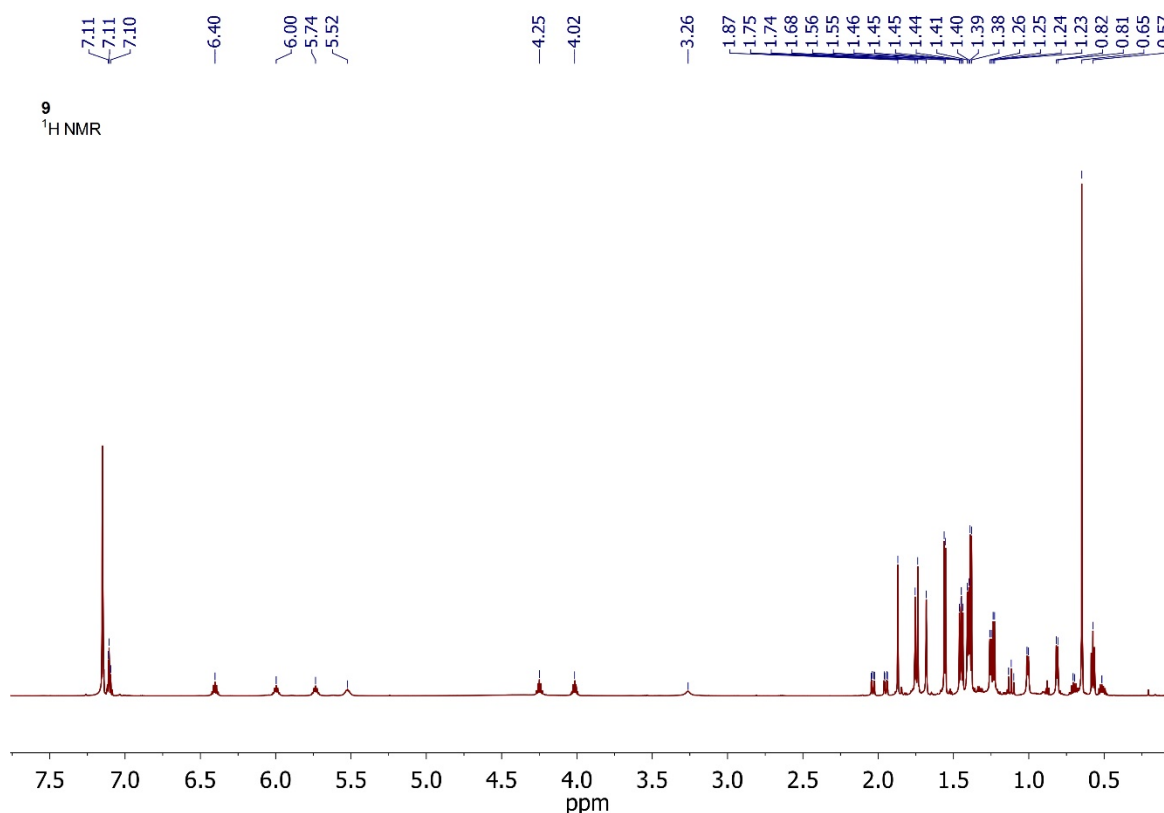

**Figure S27.**  $^1\text{H NMR}$  spectrum of **9** dissolved in  $\text{C}_6\text{D}_6$ , at 298K.

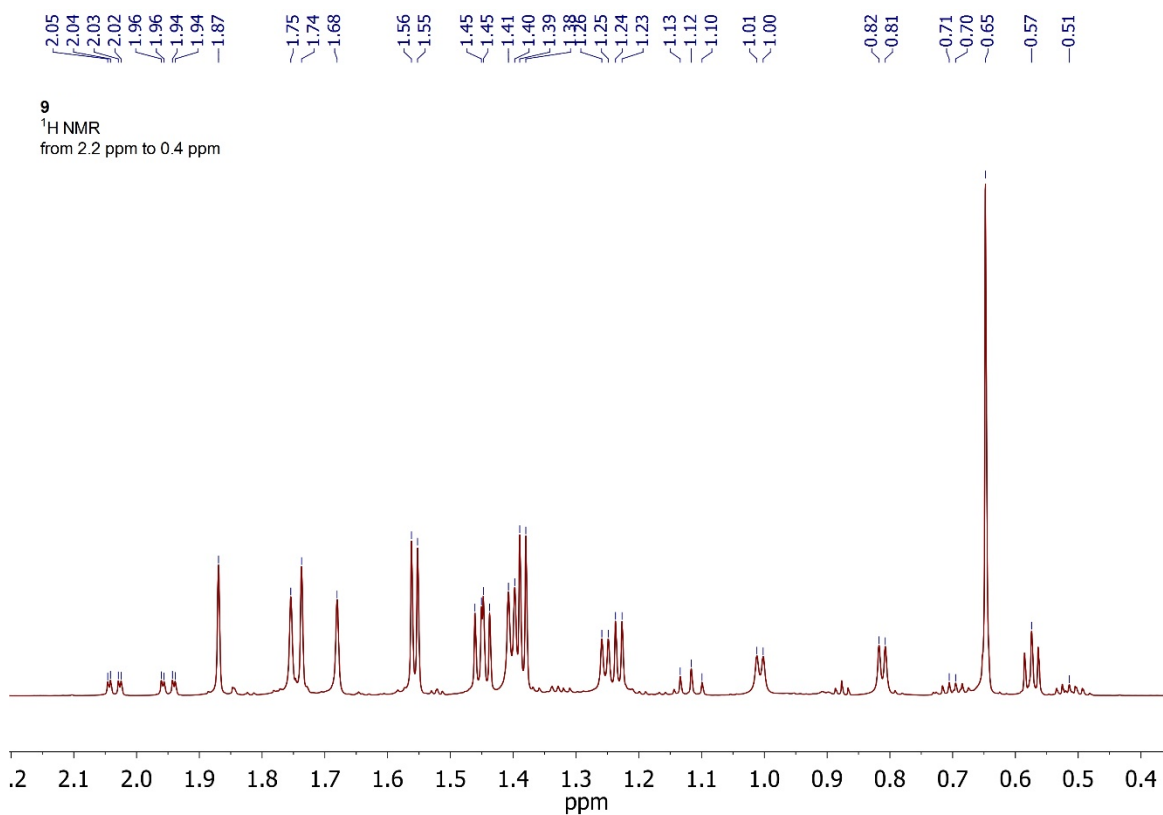

**Figure S28.** Zoom of the <sup>1</sup>H NMR spectrum of **9** dissolved in C<sub>6</sub>D<sub>6</sub>, from 0.4 ppm to 2.2 ppm, at 298K.

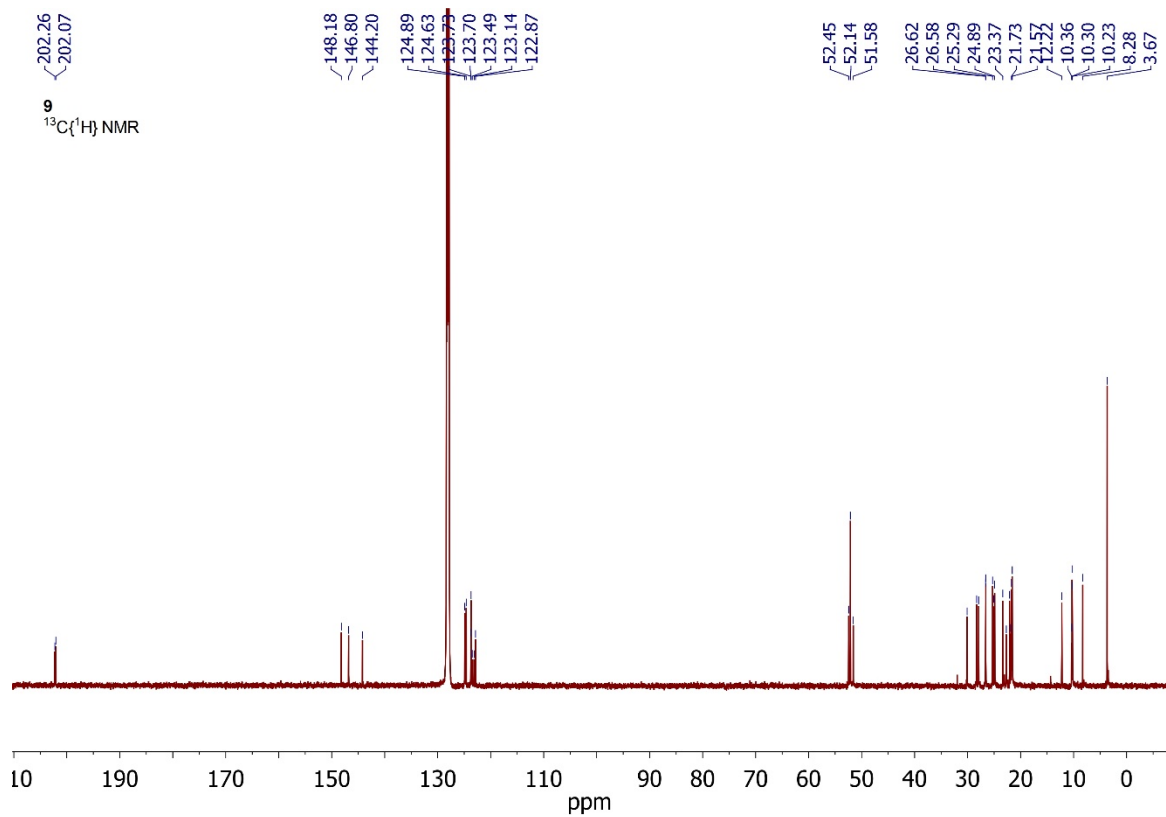

**Figure S29.** <sup>13</sup>C{<sup>1</sup>H} NMR spectrum of **9** dissolved in C<sub>6</sub>D<sub>6</sub>, at 298K.

9  
 $^{29}\text{Si}$  NMR

7.76  
5.23

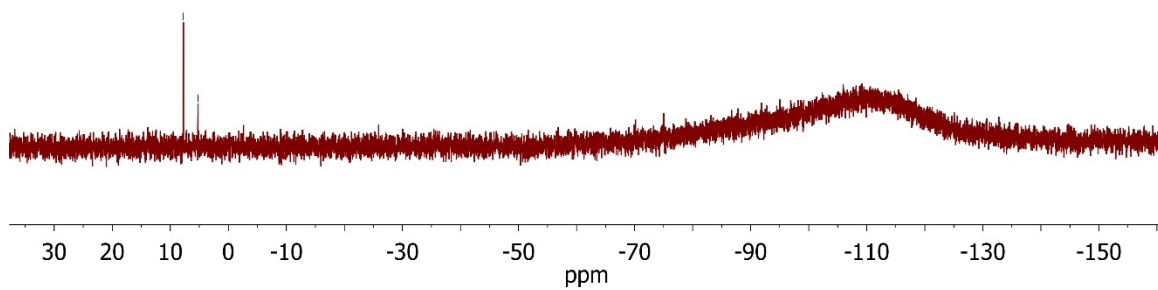

Figure S30.  $^{29}\text{Si}\{^1\text{H}\}$  NMR spectrum of **9** dissolved in  $\text{C}_6\text{D}_6$ , at 298K.

9  
 $^{29}\text{Si}, ^1\text{H}$  HMQC NMR

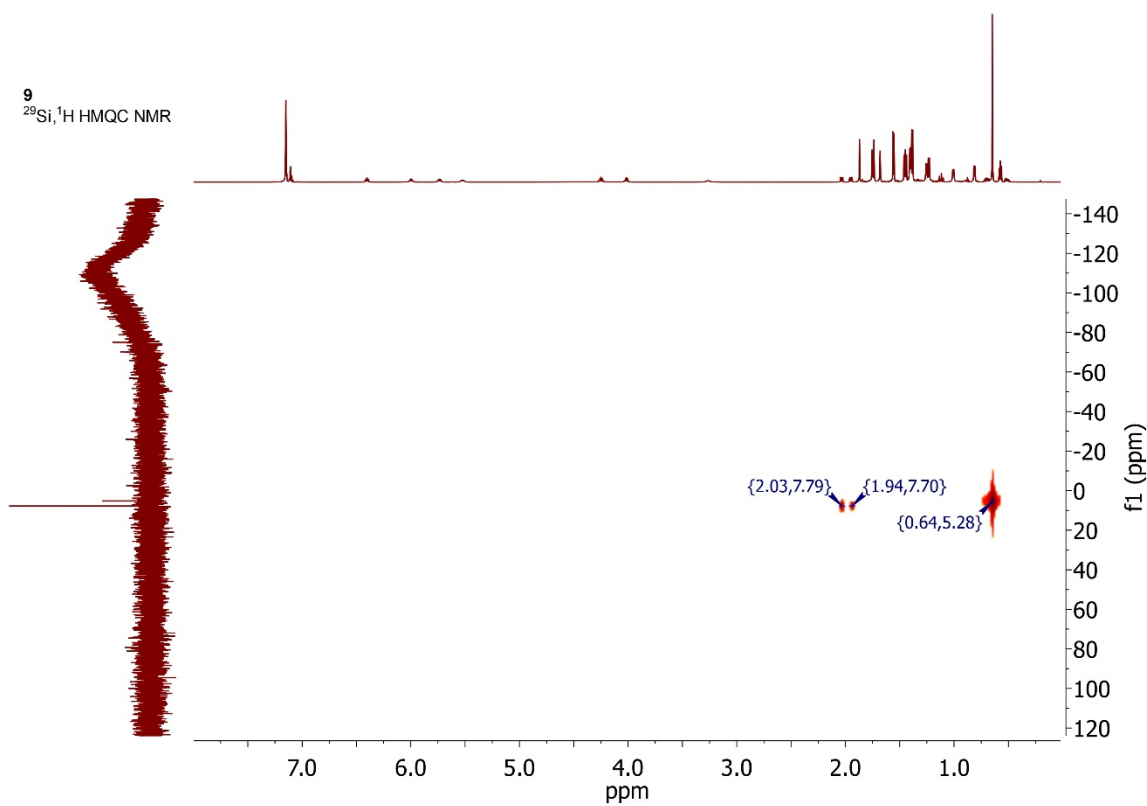

Figure S31.  $^{29}\text{Si}, ^1\text{H}$  HMQC NMR spectrum of **9** dissolved in  $\text{C}_6\text{D}_6$ , at 298K.

**Synthesis of 9-Ph.** To a solution of **1** (0.15 g, 0.21 mmol) in toluene (10 mL) was added styrene (52  $\mu$ L, 0.45 mmol) at -78  $^{\circ}$ C. The reaction was warmed to ambient temperature and stirred for 18 h, resulting in a yellow-brown solution. All volatiles were removed from this mixture *in vacuo*, and the residue extracted in hexane (10 mL). Filtration, concentration to 4 mL, and storage at ambient temperature resulted in the formation of a large crop of yellow crystalline material (100 mg, 52 %).  $^1\text{H}$  NMR ( $\text{C}_6\text{D}_6$ , 400 MHz, 298 K):  $\delta$  = 0.41 (s, 9H,  $\text{SiMe}_3$ ), 1.09 (br, 18H,  $\text{NHC-Pr}^i\text{-CH}_3$ ), 1.35 (overlapping d, 9H,  $\text{Dipp-Pr}^i\text{-CH}_3$ ), 1.45 (d,  $^3J_{\text{HH}}$  = 6.8 Hz, 3H,  $\text{Dipp-Pr}^i\text{-CH}_3$ ), 1.53 (br, 6H,  $\text{NHC-Pr}^i\text{-CH}_3$ ) 1.76 (s, 6H,  $\text{NHC-NMe}$ ), 1.81 (s, 6H,  $\text{NHC-NMe}$ ), 3.98 (sept,  $^3J_{\text{HH}}$  = 6.8 Hz, 1H,  $\text{Dipp-Pr}^i\text{-CH}$ ), 4.09 (sept,  $^3J_{\text{HH}}$  = 6.8 Hz, 1H,  $\text{Dipp-Pr}^i\text{-CH}$ ), 5.81 (br, 2H,  $\text{NHC-Pr}^i\text{-CH}$ ), 5.85 (sept,  $^3J_{\text{HH}}$  = 7.2 Hz, 2H,  $\text{NHC-Pr}^i\text{-CH}$ ), 6.89 (m, 1H,  $\text{Ar-CH}$ ), 7.06 (m, 4H,  $\text{Ar-CH}$ ), 7.21 (m, 3H,  $\text{Ar-CH}$ );  $^{13}\text{C}\{^1\text{H}\}$  NMR ( $\text{C}_6\text{D}_6$ , 75.5 MHz, 298 K):  $\delta$  = 2.6 ( $\text{SiMe}_3$ ), 10.4 and 10.5 ( $\text{NHC-NMe}$ ), 21.9, 22.7, and 23.1 (br,  $\text{NHC-Pr}^i\text{-CH}_3$ ), 24.8, 25.4, 25.7, and 26.5 ( $\text{Dipp-Pr}^i\text{-CH}_3$ ), 28.3 and 28.4 ( $\text{Dipp-Pr}^i\text{-CH}$ ), 52.4 and 52.5 ( $\text{NHC-Pr}^i\text{-CH}$ ), 124.3, 124.4, 125.5, and 125.6 ( $\text{NHC-NMe}$ ), 123.8, 127.1, 127.7, 128.4, 131.0, 135.5, 141.7, 148.2, and 168.2 ( $\text{Ar-C}$ ), 200.7 and 200.8 ( $\text{NHC-C}$ );  $^{29}\text{Si}\{^1\text{H}\}$  NMR ( $\text{C}_6\text{D}_6$ , 80 MHz, 298 K):  $\delta$  = 6.4 ( $\text{SiMe}_3$ ), -32.9 ( $\text{H-Si-L}^{\text{TMS}}$ ); anal. calcd. for  $\text{C}_{53}\text{H}_{82}\text{ClN}_5\text{NiSi}_2$ : C, 67.75 %; H, 8.80 %; N, 7.45 %; found: C, 67.89 %; H, 8.93%; N, 7.30 %.

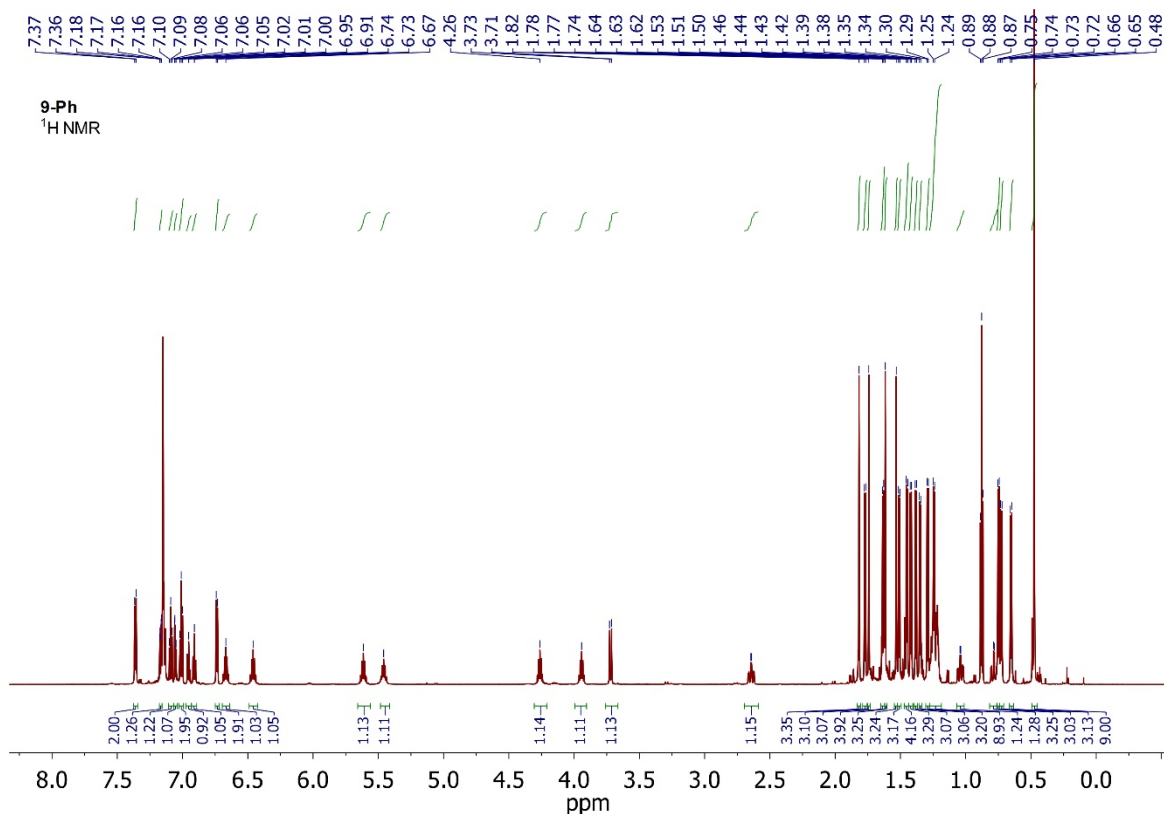

**Figure S32.**  $^1\text{H}$  NMR spectrum of **9-Ph** dissolved in  $\text{C}_6\text{D}_6$ , at 298K.



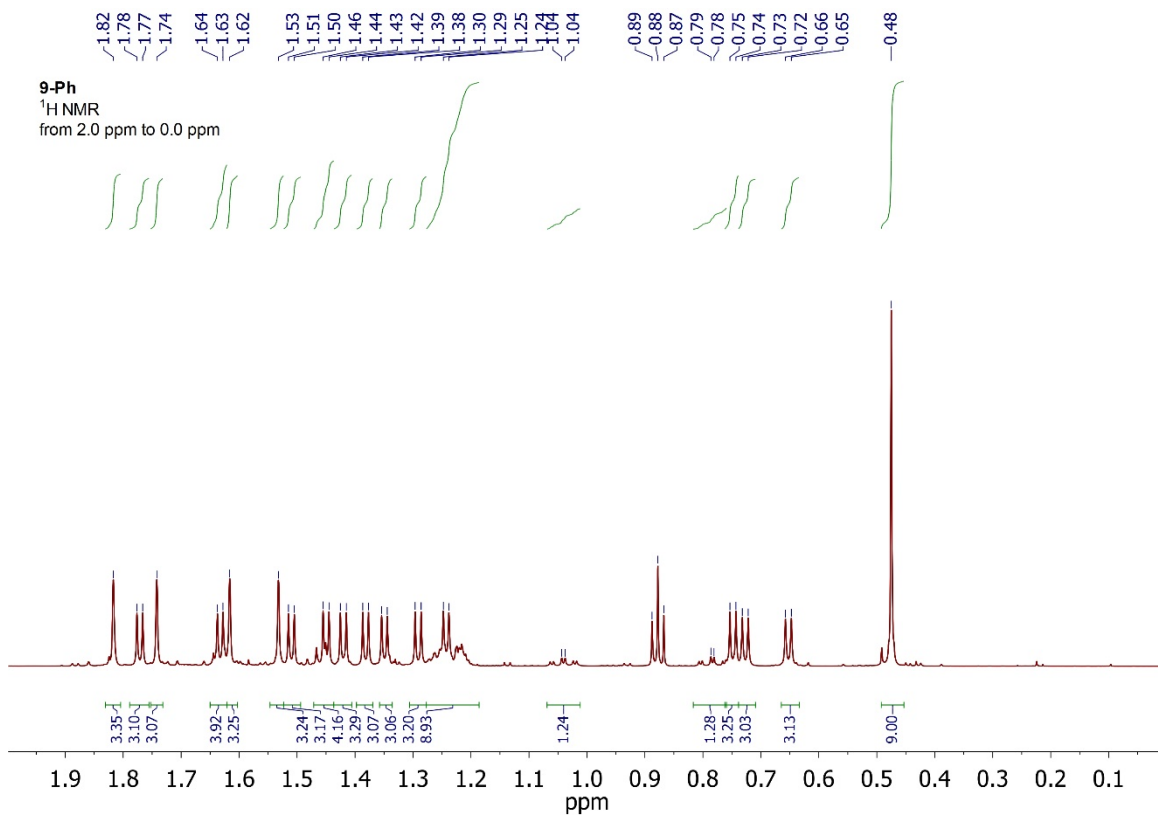

**Figure S33.** Zoom of the  $^1\text{H}$  NMR spectrum of **9-Ph** dissolved in  $\text{C}_6\text{D}_6$ , from 0.0 ppm to 2.0 ppm, at 298K.

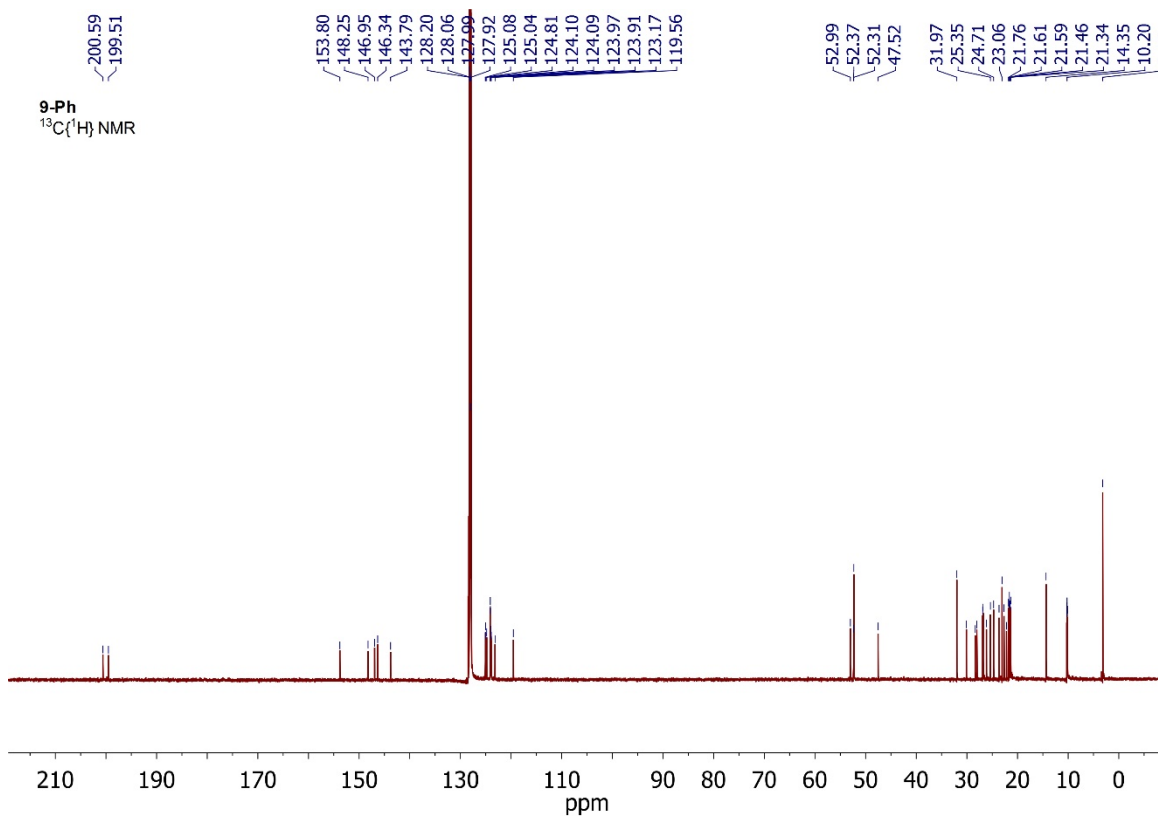

**Figure S34.**  $^{13}\text{C}\{^1\text{H}\}$  NMR spectrum of **9** dissolved in  $\text{C}_6\text{D}_6$ , at 298K.

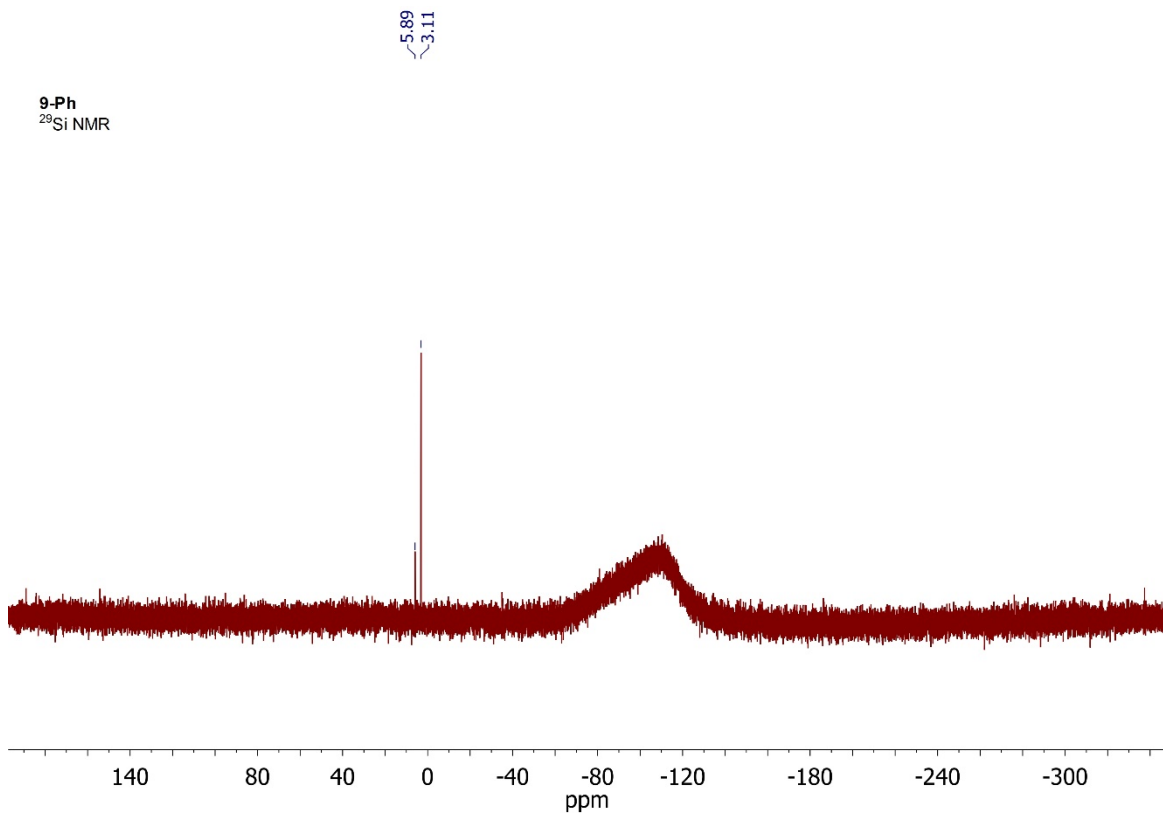

**Figure S35.** <sup>29</sup>Si{<sup>1</sup>H} NMR spectrum of **9-Ph** dissolved in C<sub>6</sub>D<sub>6</sub>, at 298K.

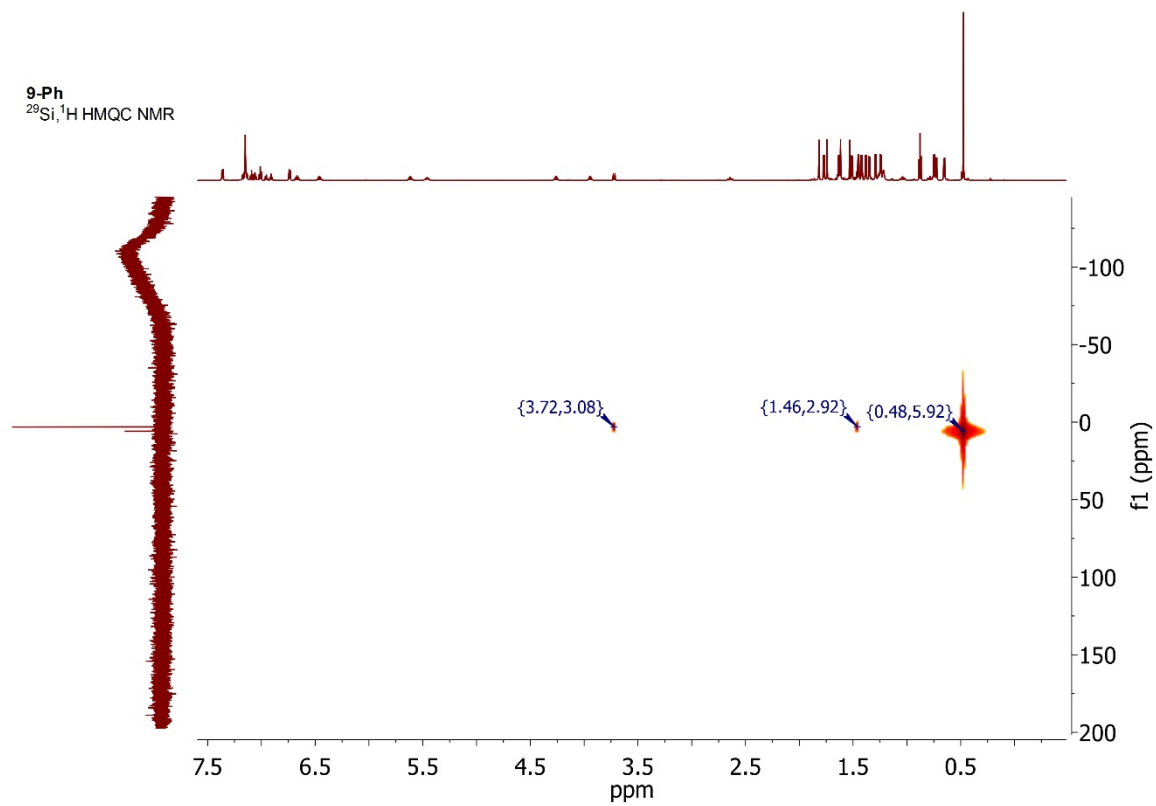

**Figure S36.** <sup>29</sup>Si, <sup>1</sup>H HMQC NMR spectrum of **9-Ph** dissolved in C<sub>6</sub>D<sub>6</sub>, at 298K.

**Synthesis of 10.** A solution of **1** (0.15 g, 0.21 mmol) in toluene (10 mL) was cooled to  $-78\text{ }^{\circ}\text{C}$ , and 2-butyne added *via* pipette (50  $\mu\text{L}$ , 0.62 mmol). The reaction initially became bright yellow-orange, and slowly became pale yellow after stirring with warming to ambient temperature overnight. All volatiles were subsequently removed *in vacuo*, the reaction mixture extracted in hexane (15mL), and concentrated to  $\sim 2\text{ mL}$ , whereupon colorless crystals began to form. Storage of this sample at ambient temperature overnight allowed for the formation of large colorless crystals of **10** suitable for an X-ray diffraction analysis. (35 mg, 41 %).  $^1\text{H NMR}$  ( $\text{C}_6\text{D}_6$ , 200 MHz, 298 K):  $\delta = 0.24$  (s, 9H,  $\text{SiMe}_3$ ), 1.20 (d,  $^3J_{\text{HH}} = 6.8\text{ Hz}$ , 6H, Dipp-Pr<sup>i</sup>- $\text{CH}_3$ ), 1.29 (d,  $^3J_{\text{HH}} = 6.8\text{ Hz}$ , 6H, Dipp-Pr<sup>i</sup>- $\text{CH}_3$ ), 1.53 (br s, 6H,  $\text{Si}\{\text{C}(\text{Me})\text{C}(\text{Me})\}_2$ ), 1.63 (br s, 6H,  $\text{Si}\{\text{C}(\text{Me})\text{C}(\text{Me})\}_2$ ), 3.63 (sept,  $^3J_{\text{HH}} = 6.8\text{ Hz}$ , 2H, Dipp-Pr<sup>i</sup>-CH), 7.05 (m, 3H, Ar-CH);  $^{13}\text{C}\{^1\text{H}\}$  NMR ( $\text{C}_6\text{D}_6$ , 75.5 MHz, 298 K):  $\delta = 1.8$  ( $\text{SiMe}_3$ ), 13.2 and 13.7 ( $\text{Si}\{\text{C}(\text{Me})\text{C}(\text{Me})\}_2$ ), 24.9 and 25.0 (Dipp-Pr<sup>i</sup>- $\text{CH}_3$ ), 27.9 (Dipp-Pr<sup>i</sup>-CH), 125.6 and 126.2 ( $\text{Si}\{\text{C}(\text{Me})\text{C}(\text{Me})\}_2$ ), 123.9, 147.6, and 149.6 (Ar-CH);  $^{29}\text{Si}\{^1\text{H}\}$  NMR ( $\text{C}_6\text{D}_6$ , 80 MHz, 298 K):  $\delta = 7.7$  ( $\text{SiMe}_3$ ),  $-5.9$  ( $\text{Si}\{\text{C}(\text{Me})\text{C}(\text{Me})\}_2$ ); anal. calcd. for  $\text{C}_{23}\text{H}_{38}\text{ClNSi}_2$ : C, 65.75 %; H, 9.12 %; N, 3.33 %; found: C, 65.46 %; H, 9.18 %; N, 3.32 %.

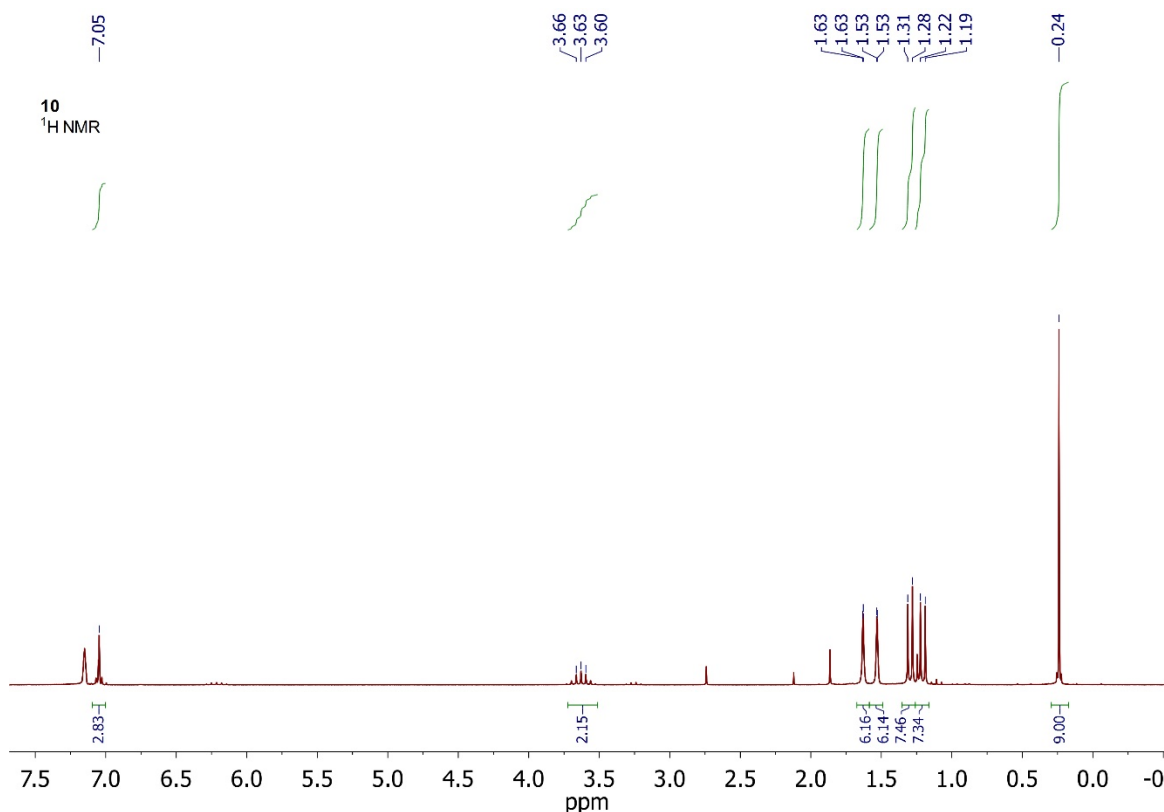

**Figure S37.**  $^1\text{H NMR}$  spectrum of **10** dissolved in  $\text{C}_6\text{D}_6$ , at 298K.

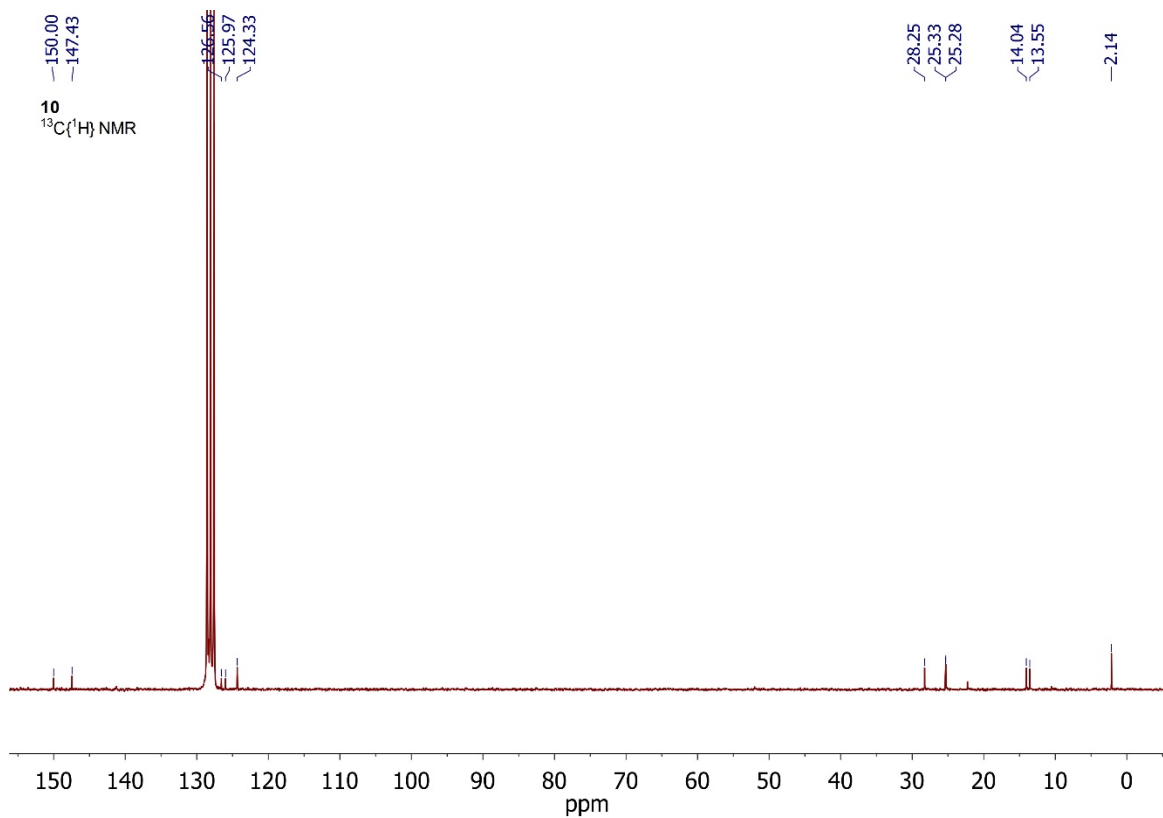

**Figure S38.**  $^{13}\text{C}\{^1\text{H}\}$  NMR spectrum of **10** dissolved in  $\text{C}_6\text{D}_6$ , at 298K.

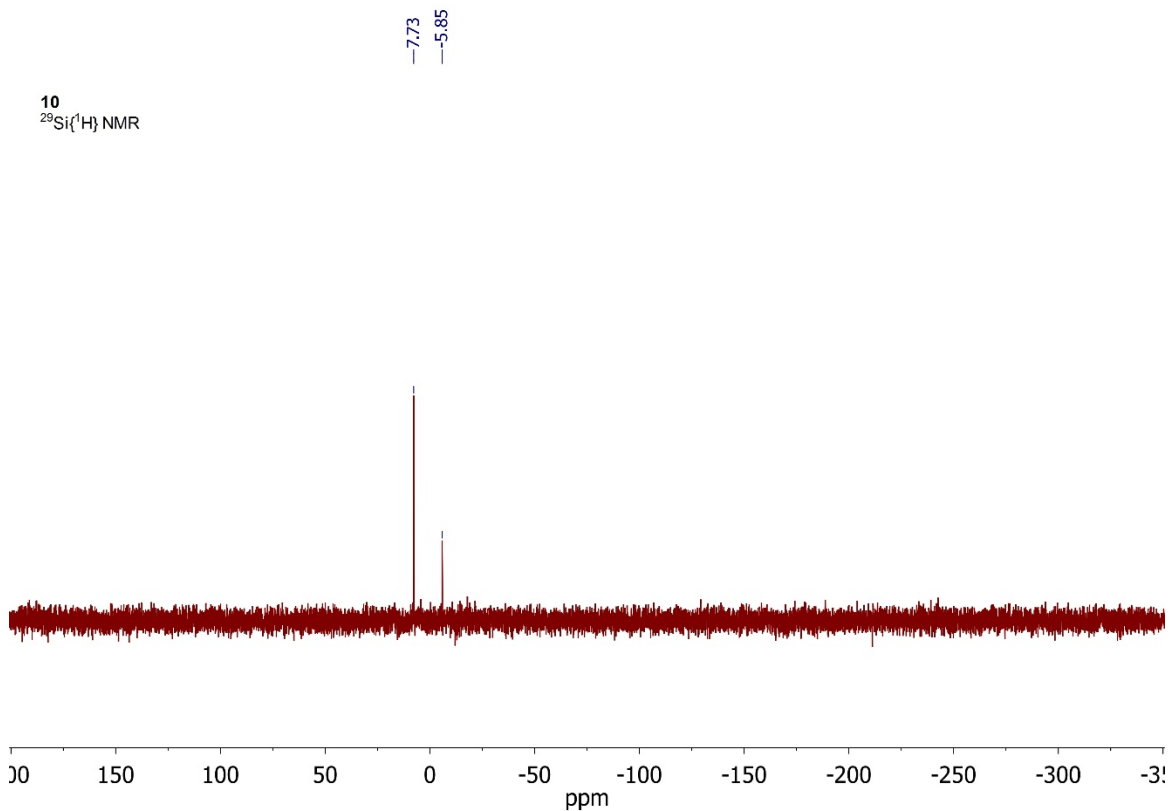

**Figure S39.**  $^{29}\text{Si}\{^1\text{H}\}$  NMR spectrum of **10** dissolved in  $\text{C}_6\text{D}_6$ , at 298K.



## 2. X-Ray crystallographic data

Crystals were mounted on a glass capillary in perfluorinated oil and measured in a cold N<sub>2</sub> flow. The data was collected on an Oxford Diffraction SuperNova Atlas at 150 K (Cu-K $\alpha$  radiation,  $\lambda$ = 1.54184 Å). The structures were solved by direct methods or using the SHELXT program<sup>2</sup> and refined on F<sup>2</sup> with the SHELX-2014 software package.<sup>3</sup> The positions of the H atoms were calculated and considered isotropically according to a riding model, aside from the Ni-H moiety found in **3**, which was located and freely refined. Full crystal data, refinement and data collection details for all crystallographically characterized compounds can be found in their CIFs.

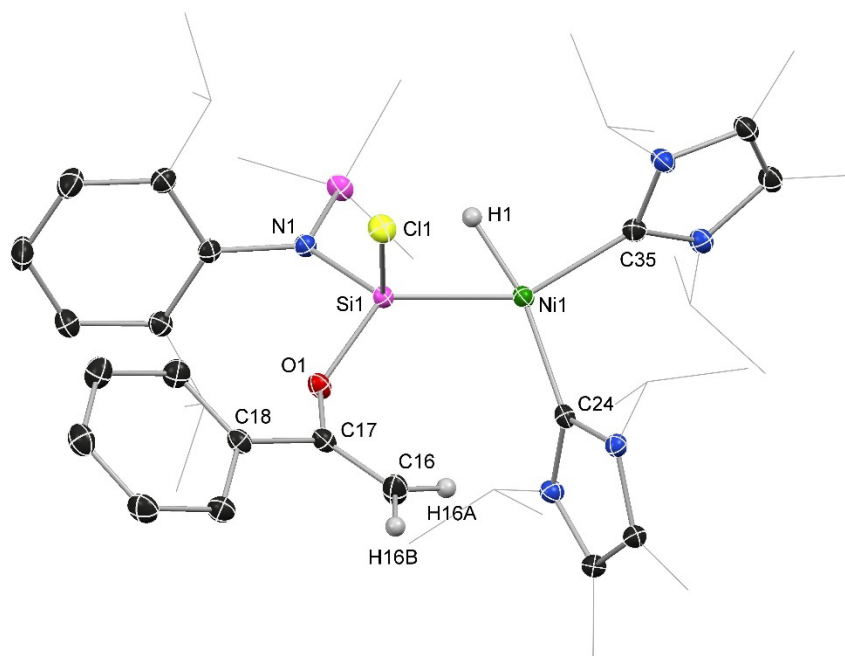

**Figure S40.** The molecular structure of **3**, with thermal ellipsoids at 30% probability.

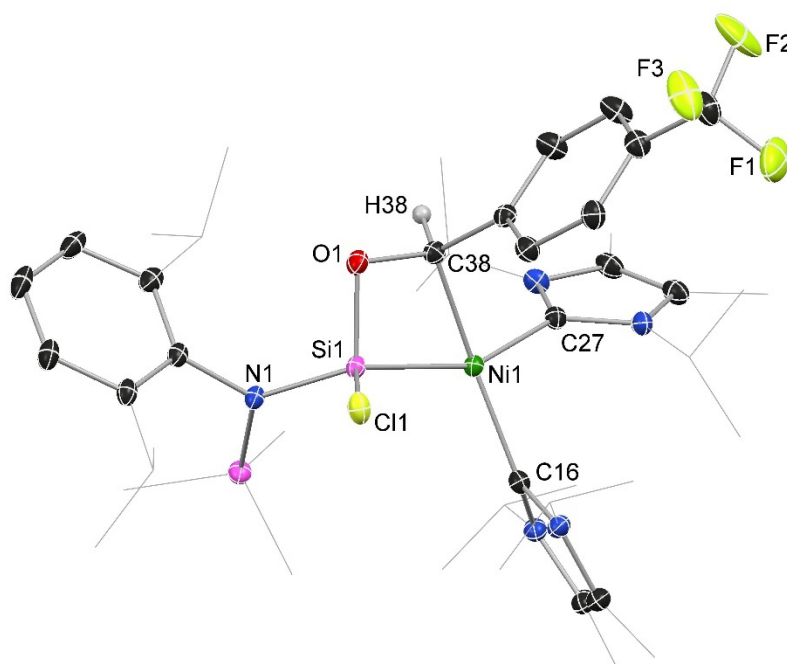

**Figure S41.** The molecular structure of **4**, with thermal ellipsoids at 30% probability.

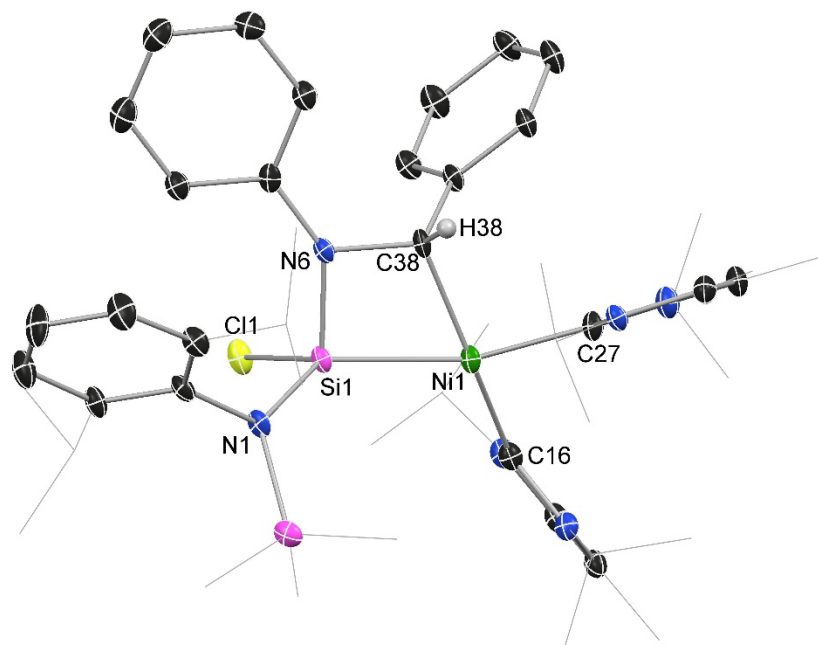

**Figure S42.** The molecular structure of **5**, with thermal ellipsoids at 30% probability.

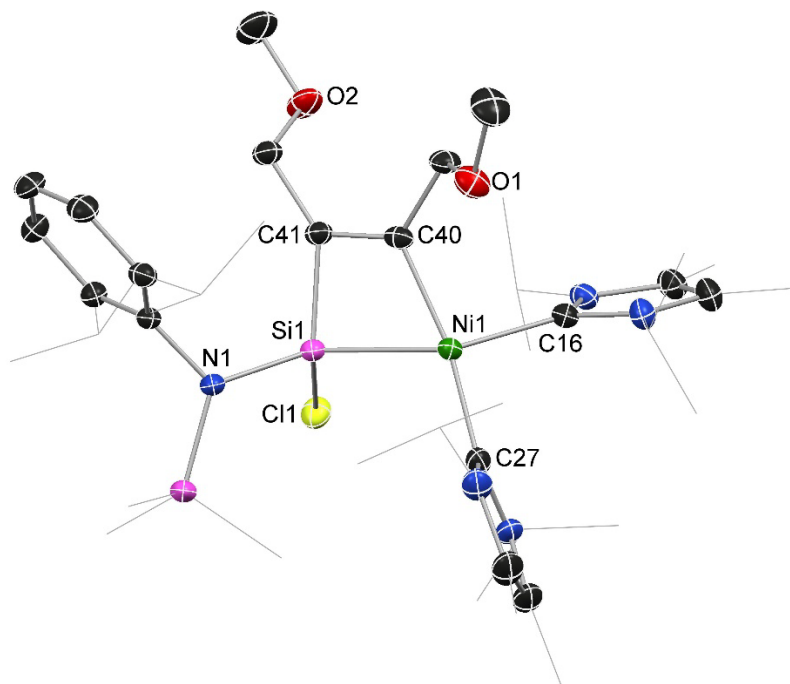

**Figure S43.** The molecular structure of **6-OMe**, with thermal ellipsoids at 30% probability.

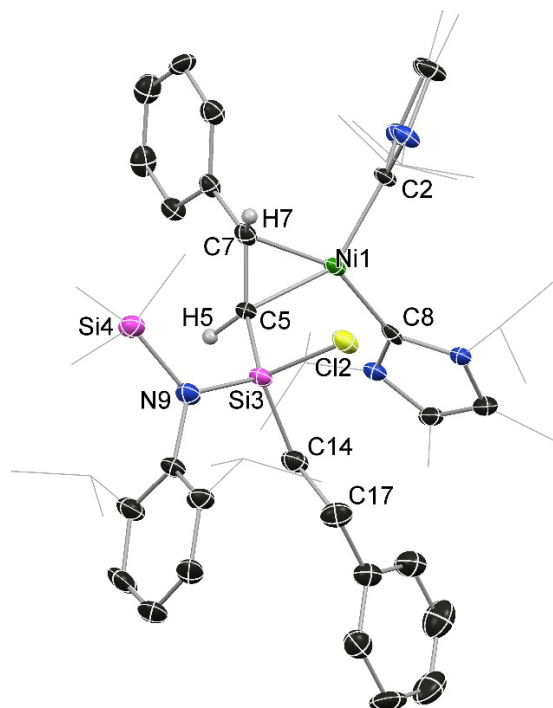

**Figure S44.** The molecular structure of **9-Ph**, with thermal ellipsoids at 30% probability.

**Table S1.** Summary of crystallographic data for compounds **3**, **4**, **5**, **6**, and **6-OMe**.

|                                                  | <b>3</b>                                                            | <b>4</b>                                                                           | <b>5</b>                                                           | <b>6</b>                                                           | <b>6-OMe</b>                                                                      |
|--------------------------------------------------|---------------------------------------------------------------------|------------------------------------------------------------------------------------|--------------------------------------------------------------------|--------------------------------------------------------------------|-----------------------------------------------------------------------------------|
| empirical form.                                  | C <sub>45</sub> H <sub>74</sub> ClN <sub>5</sub> NiOSi <sub>2</sub> | C <sub>45</sub> H <sub>71</sub> ClF <sub>3</sub> N <sub>5</sub> NiOSi <sub>2</sub> | C <sub>50</sub> H <sub>77</sub> ClN <sub>6</sub> NiSi <sub>2</sub> | C <sub>39</sub> H <sub>68</sub> ClN <sub>5</sub> NiSi <sub>2</sub> | C <sub>43</sub> H <sub>76</sub> ClN <sub>5</sub> NiO <sub>2</sub> Si <sub>2</sub> |
| formula wt                                       | 851.43                                                              | 905.40                                                                             | 912.51                                                             | 757.32                                                             | 845.42                                                                            |
| crystal syst.                                    | triclinic                                                           | orthorhombic                                                                       | orthorhombic                                                       | orthorhombic                                                       | monoclinic                                                                        |
| space group                                      | <i>P</i> -1                                                         | <i>P</i> 2 <sub>1</sub> 2 <sub>1</sub>                                             | <i>P</i> na2 <sub>1</sub>                                          | <i>P</i> bca                                                       | <i>P</i> 2 <sub>1</sub> / <i>n</i>                                                |
| <i>a</i> (Å)                                     | 10.0535(3)                                                          | 13.12070(10)                                                                       | 25.1576(5)                                                         | 18.5613(6)                                                         | 10.11490(10)                                                                      |
| <i>b</i> (Å)                                     | 12.7880(4)                                                          | 18.32810(10)                                                                       | 12.7701(3)                                                         | 18.5497(5)                                                         | 14.278799(4)                                                                      |
| <i>c</i> (Å)                                     | 20.3697(5)                                                          | 19.8222(2)                                                                         | 15.4377(4)                                                         | 24.7704(6)                                                         | 17.5039(2)                                                                        |
| $\alpha$ (deg.)                                  | 75.549(2)                                                           | 90                                                                                 | 90                                                                 | 90                                                                 | 90                                                                                |
| $\beta$ (deg.)                                   | 87.147(2)                                                           | 90                                                                                 | 90                                                                 | 90                                                                 | 100.7680(10)                                                                      |
| $\gamma$ (deg.)                                  | 70.938(3)                                                           | 90                                                                                 | 90                                                                 | 90                                                                 | 90                                                                                |
| vol (Å <sup>3</sup> )                            | 2395.46(13)                                                         | 4766.79(7)                                                                         | 4959.6(2)                                                          | 8528.6(4)                                                          | 4849.22(10)                                                                       |
| <i>Z</i>                                         | 2                                                                   | 4                                                                                  | 4                                                                  | 8                                                                  | 4                                                                                 |
| $\rho$ (calc) (g.cm <sup>-3</sup> )              | 1.180                                                               | 1.262                                                                              | 1.222                                                              | 1.180                                                              | 1.158                                                                             |
| $\mu$ (mm <sup>-1</sup> )                        | 1.854                                                               | 1.988                                                                              | 1.817                                                              | 2.003                                                              | 1.842                                                                             |
| <i>F</i> (000)                                   | 920                                                                 | 1936                                                                               | 1968                                                               | 3280                                                               | 1832                                                                              |
| <i>T</i> (K)                                     | 150(2)                                                              | 150(2)                                                                             | 150(2)                                                             | 150(2)                                                             | 150(2)                                                                            |
| reflns collect.                                  | 16804                                                               | 19407                                                                              | 20162                                                              | 60903                                                              | 34731                                                                             |
| unique reflns                                    | 9032                                                                | 8502                                                                               | 8535                                                               | 8086                                                               | 9195                                                                              |
| <i>R</i> <sub>int</sub>                          | 0.0221                                                              | 0.0199                                                                             | 0.0672                                                             | 0.0480                                                             | 0.0379                                                                            |
| <i>R</i> 1 [ <i>I</i> > 2 $\sigma$ ( <i>I</i> )] | 0.0230                                                              | 0.0242                                                                             | 0.0713                                                             | 0.0253                                                             | 0.0300                                                                            |
| w <i>R</i> 2 (all data)                          | 0.0904                                                              | 0.0846                                                                             | 0.2176                                                             | 0.1082                                                             | 0.1044                                                                            |
| CCDC No.                                         | 1935411                                                             | 1935412                                                                            | 1935413                                                            | 1935414                                                            | 1935415                                                                           |



**Table S2.** Summary of crystallographic data for compounds **7**, **9**, **9-Ph**, and **10**.

|                                                  | <b>7</b>                                                           | <b>9</b>                                                           | <b>9-Ph</b> ·1(hexane)                                             | <b>10</b>                                          |
|--------------------------------------------------|--------------------------------------------------------------------|--------------------------------------------------------------------|--------------------------------------------------------------------|----------------------------------------------------|
| empirical form.                                  | C <sub>39</sub> H <sub>70</sub> CIN <sub>5</sub> NiSi <sub>2</sub> | C <sub>41</sub> H <sub>74</sub> CIN <sub>5</sub> NiSi <sub>2</sub> | C <sub>56</sub> H <sub>89</sub> CIN <sub>5</sub> NiSi <sub>2</sub> | C <sub>23</sub> H <sub>38</sub> CINSi <sub>2</sub> |
| formula wt                                       | 759.34                                                             | 787.39                                                             | 982.66                                                             | 420.17                                             |
| crystal syst.                                    | orthorhombic                                                       | monoclinic                                                         | monoclinic                                                         | monoclinic                                         |
| space group                                      | <i>Pbca</i>                                                        | <i>P2<sub>1</sub>/c</i>                                            | <i>P2<sub>1</sub>/c</i>                                            | <i>C2/c</i>                                        |
| <i>a</i> (Å)                                     | 18.6232(5)                                                         | 10.7905(2)                                                         | 10.3865(2)                                                         | 15.5485(3)                                         |
| <i>b</i> (Å)                                     | 18.4205(6)                                                         | 25.2369(5)                                                         | 22.2433(6)                                                         | 9.5907(2)                                          |
| <i>c</i> (Å)                                     | 24.8498(6)                                                         | 16.9414(4)                                                         | 25.0818(5)                                                         | 33.9484(7)                                         |
| $\alpha$ (deg.)                                  | 90                                                                 | 90                                                                 | 90                                                                 | 90                                                 |
| $\beta$ ( $\delta\epsilon\gamma$ )               | 90                                                                 | 92.780(2)                                                          | 99.863(2)                                                          | 104.255(2)                                         |
| $\gamma$ (deg.)                                  | 90                                                                 | 90                                                                 | 90                                                                 | 90                                                 |
| vol (Å <sup>3</sup> )                            | 8524.7(4)                                                          | 4608.03(17)                                                        | 5709.0(2)                                                          | 4906.54(18)                                        |
| <i>Z</i>                                         | 8                                                                  | 4                                                                  | 4                                                                  | 8                                                  |
| $\rho$ (calc) (g.cm <sup>-3</sup> )              | 1.183                                                              | 1.135                                                              | 1.143                                                              | 1.138                                              |
| $\mu$ (mm <sup>-1</sup> )                        | 2.004                                                              | 1.870                                                              | 1.604                                                              | 2.355                                              |
| <i>F</i> (000)                                   | 3296                                                               | 1712                                                               | 2132                                                               | 1824                                               |
| <i>T</i> (K)                                     | 150(2)                                                             | 150(2)                                                             | 150(2)                                                             | 150(2)                                             |
| reflns collect.                                  | 33492                                                              | 18612                                                              | 22039                                                              | 10172                                              |
| unique reflns                                    | 8002                                                               | 8692                                                               | 10306                                                              | 4624                                               |
| <i>R</i> <sub>int</sub>                          | 0.0456                                                             | 0.0416                                                             | 0.1013                                                             | 0.0220                                             |
| <i>R</i> 1 [ <i>I</i> > 2 $\sigma$ ( <i>I</i> )] | 0.0334                                                             | 0.0539                                                             | 0.1296                                                             | 0.0246                                             |
| <i>wR</i> 2 (all data)                           | 0.1170                                                             | 0.1324                                                             | 0.2945                                                             | 0.0908                                             |
| CCDC No.                                         | 1935416                                                            | 1935417                                                            | 1935418                                                            | 1935419                                            |

### 3. Computational methods and data

DFT calculations were performed at the B97-D/cc-pVTZ//B97-D/6-31G(d)[Ni: cc-pVTZ] level of theory,<sup>4</sup> with the GAUSSIAN 09.D01 software.<sup>5</sup> Stationary points were verified by harmonic vibrational frequency calculations. Transition states were analyzed by intrinsic reaction coordinate (IRC) calculations.

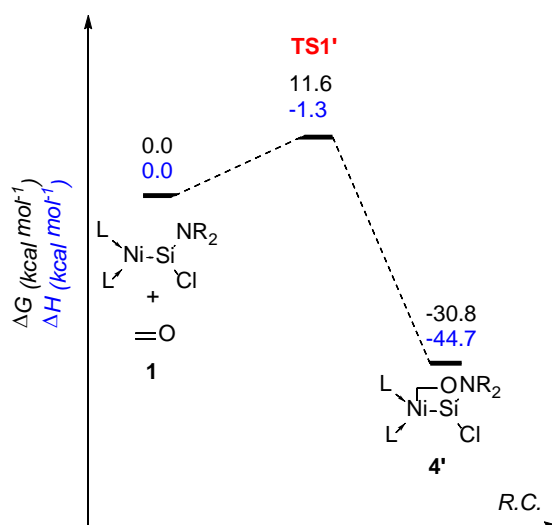

Figure S45. Reaction pathway for the addition of H<sub>2</sub>CO to 1. L = NHC, NR<sub>2</sub> = TMS<sub>L</sub>.

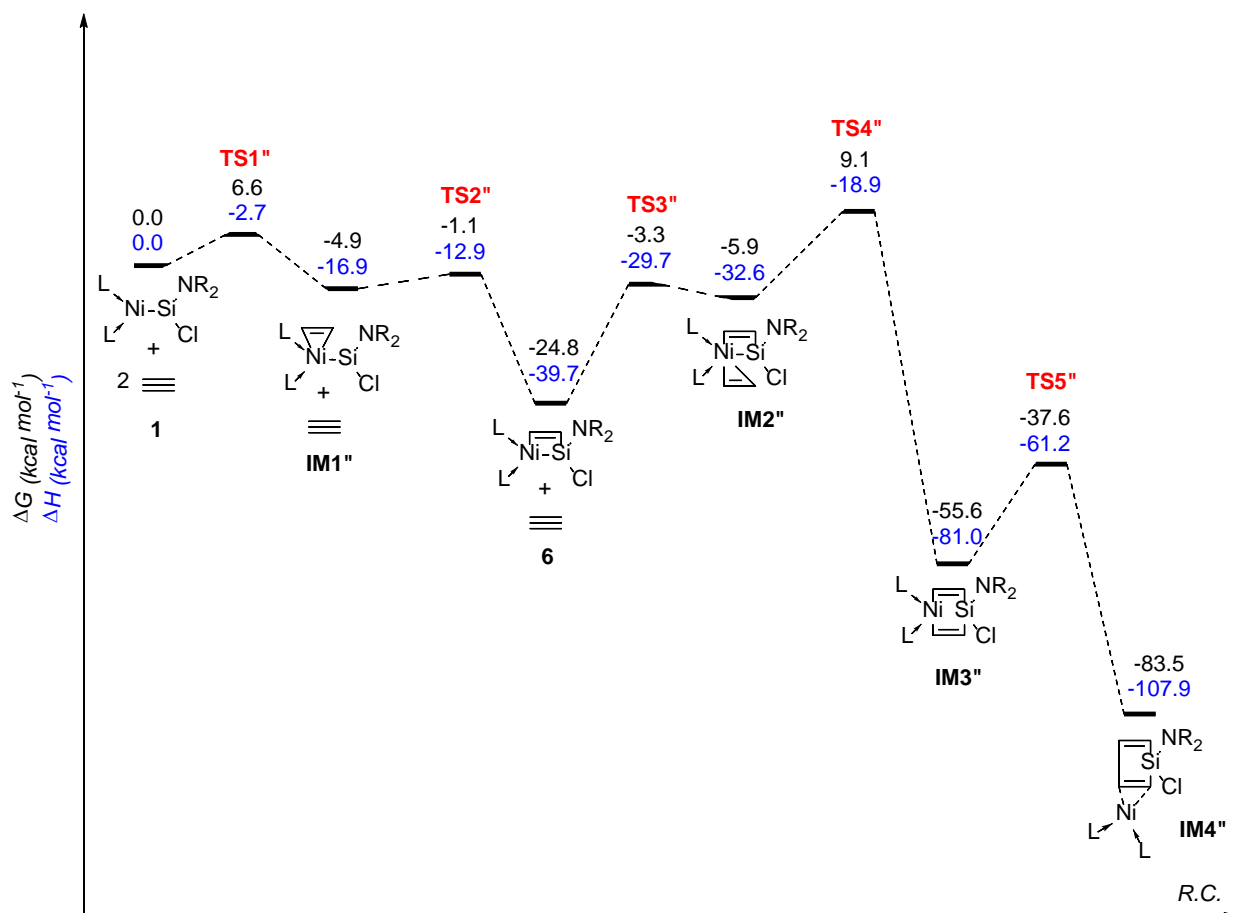

Figure S46. Reaction pathway for the addition of 2 equiv. C<sub>2</sub>H<sub>2</sub> to 1. L = NHC, NR<sub>2</sub> = TMS<sub>L</sub>.

## Frontier orbitals of compound 6

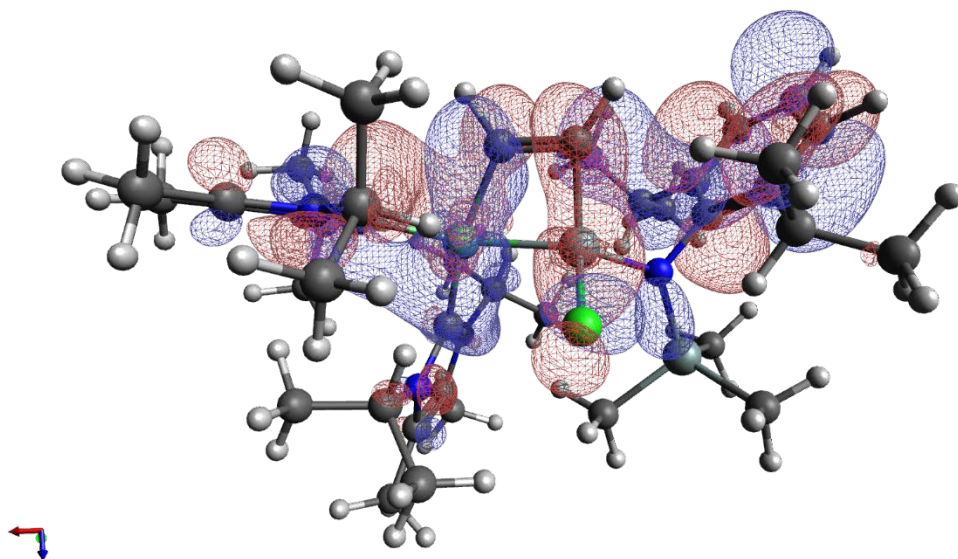

Figure S47. LUMO+1 (-0.181 eV).

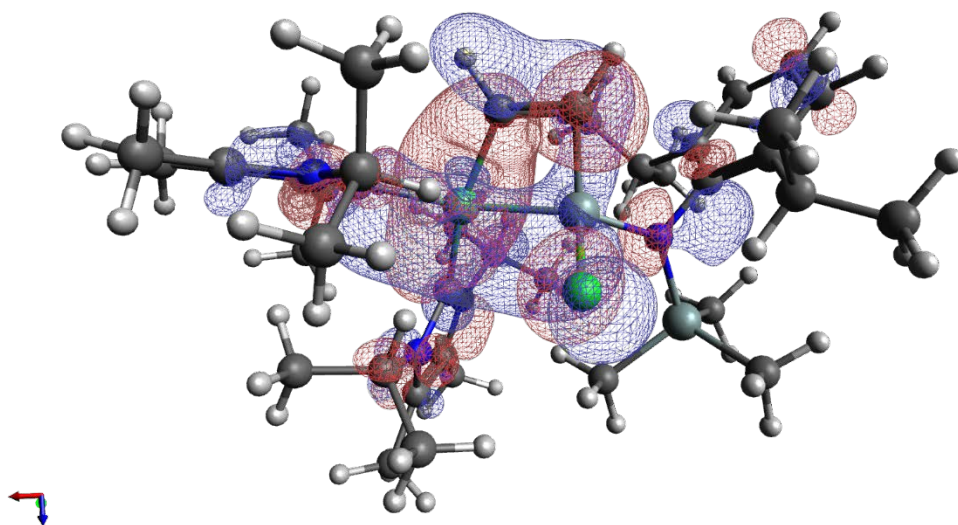

Figure S48. LUMO (-0.594 eV).

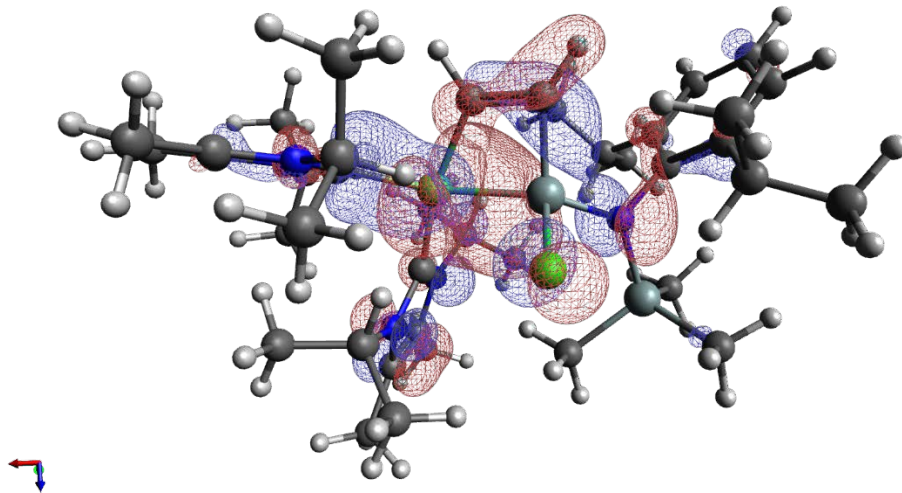

Figure S49. HOMO (-3.300 eV)

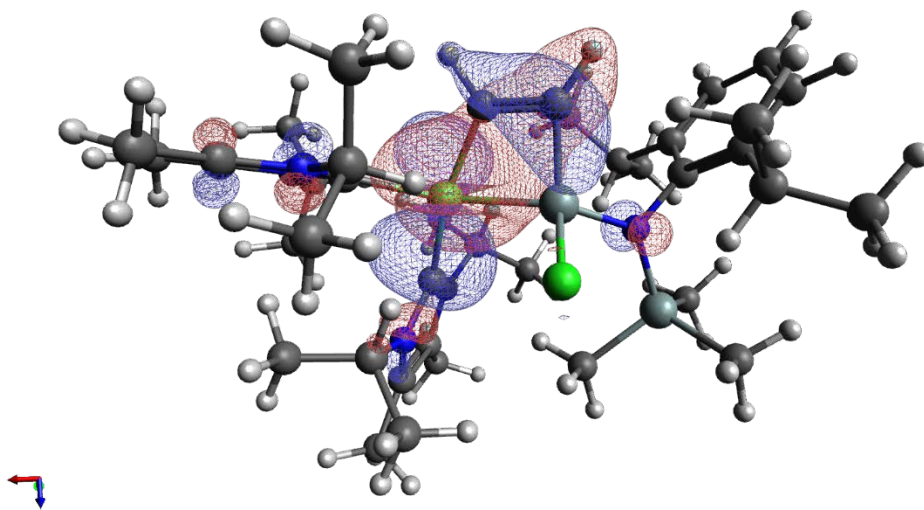

Figure S50. HOMO-2 (-3.408 eV).

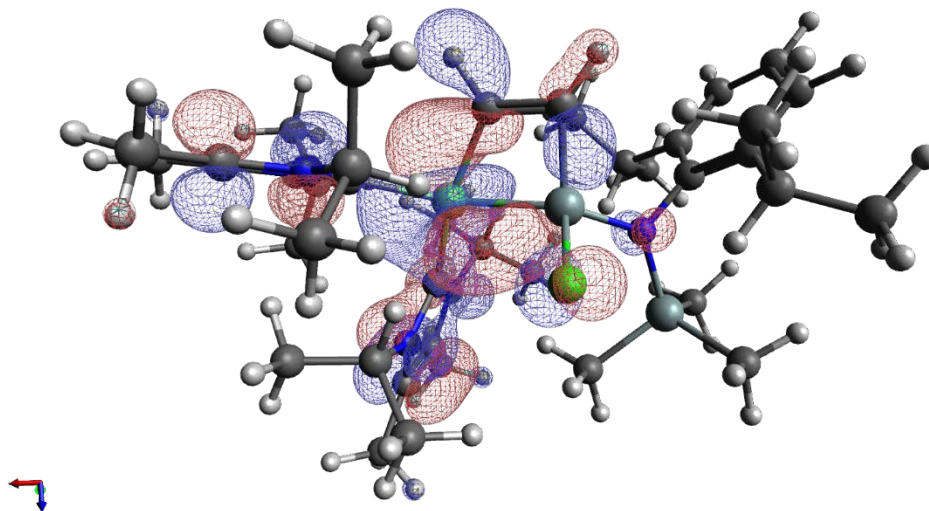

Figure S51. HOMO-3 (-3.812 eV).

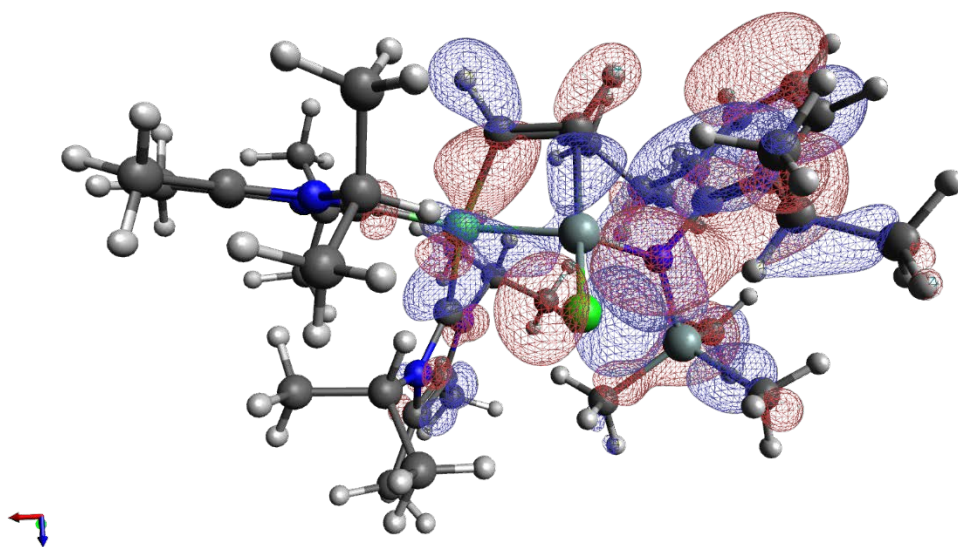

**Figure S52.** HOMO-5 (4.667 eV).

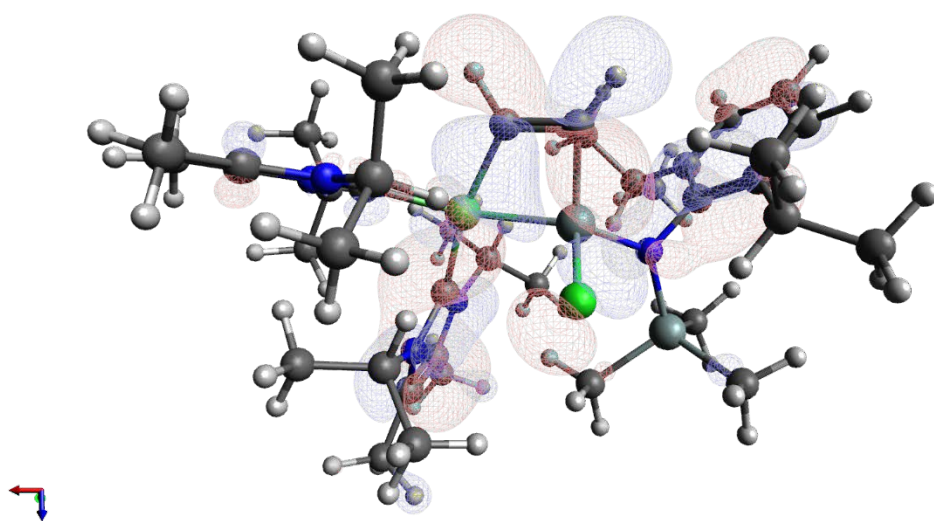

**Figure S53.** HOMO-7 (-4.846 eV).

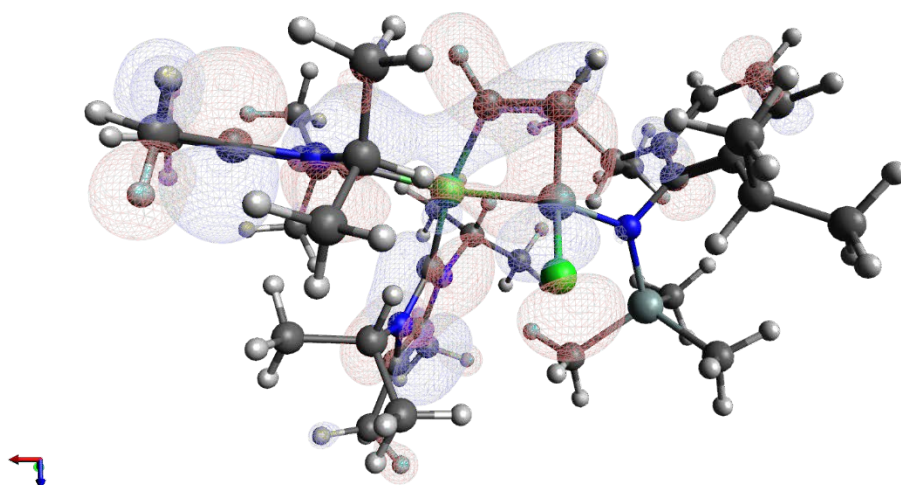

Figure S54. HOMO-9 (-5.144 eV).

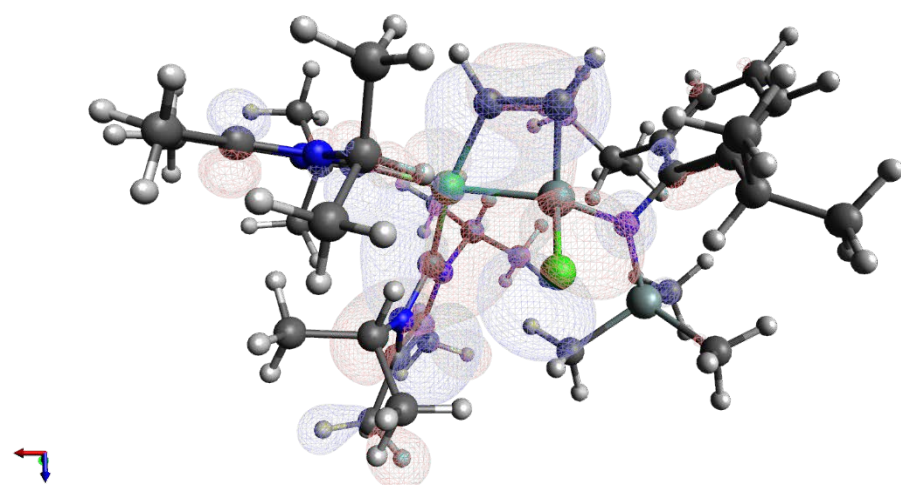

Figure S55. HOMO-10 (-5.487 eV).

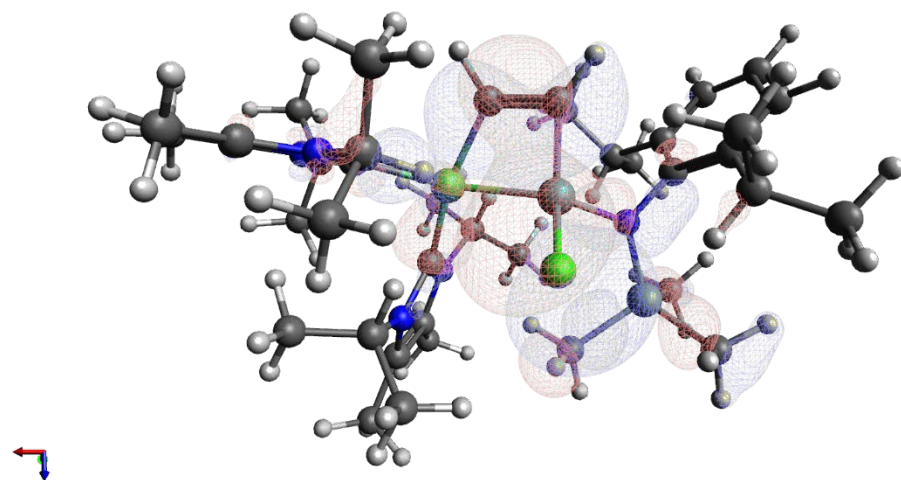

Figure S56. HOMO-12 (-6.031 eV).

## Frontier orbitals of compound 7

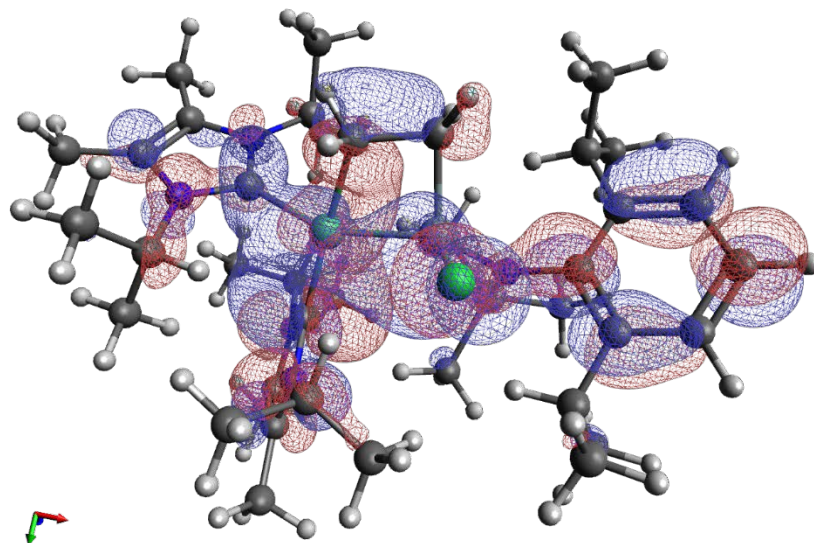

Figure S57. LUMO+1 (-0.120 eV).

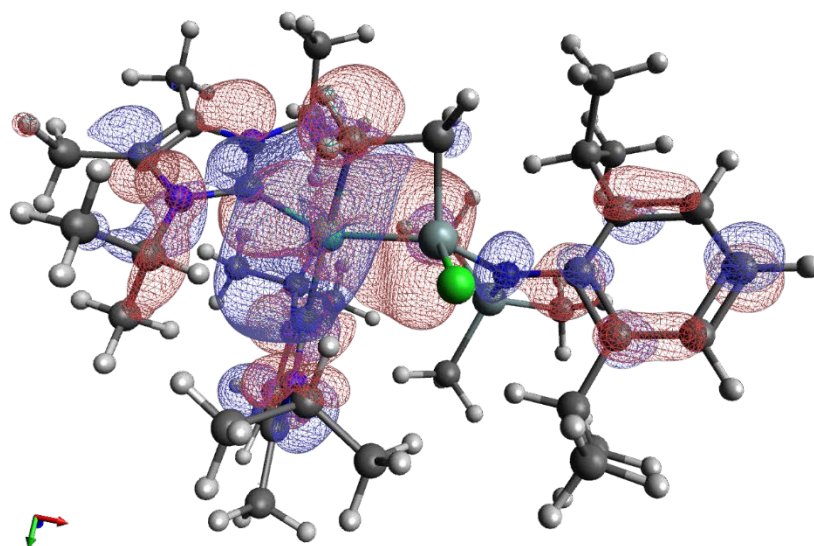

Figure S58. LUMO (-0.431 eV).

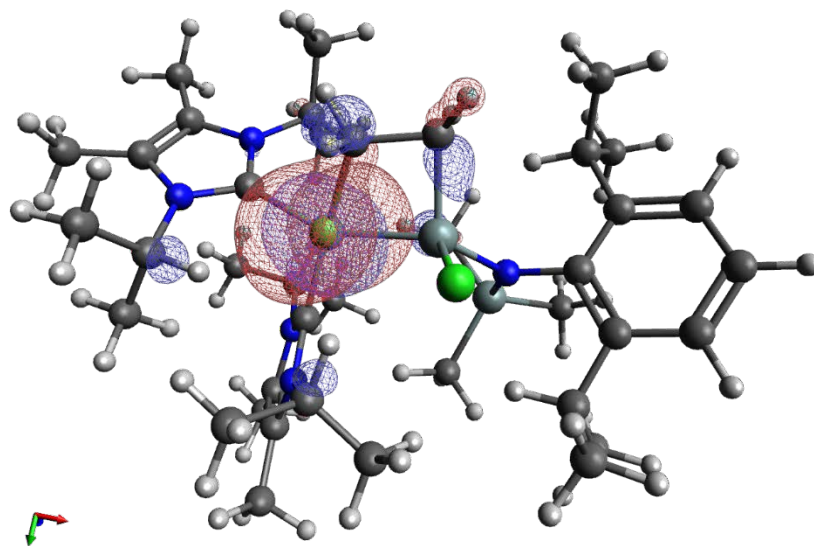

**Figure S59.** HOMO (-3.211 eV).

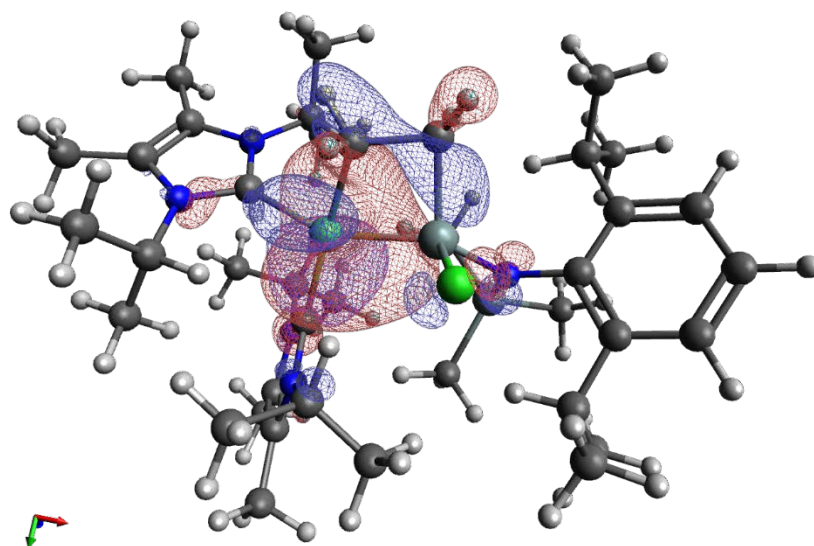

**Figure S60.** HOMO-1 (-3.466 eV).



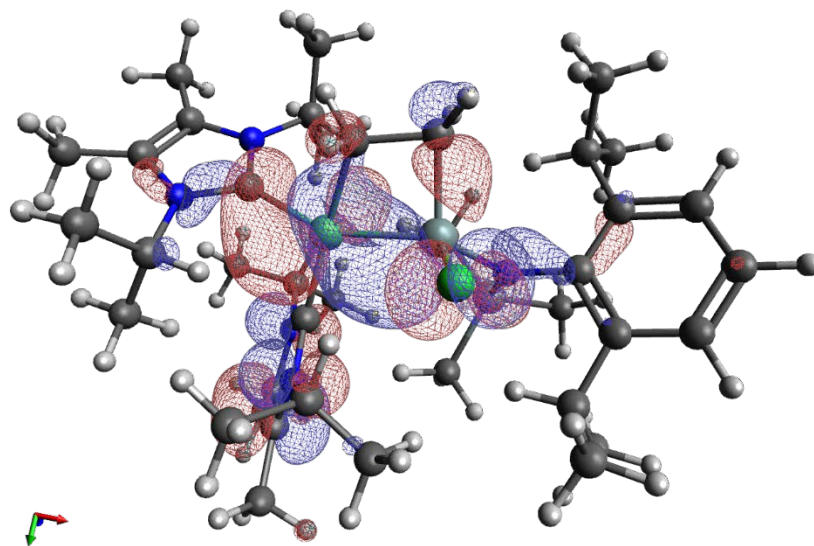

**Figure S61.** HOMO-2 (-3.579 eV).

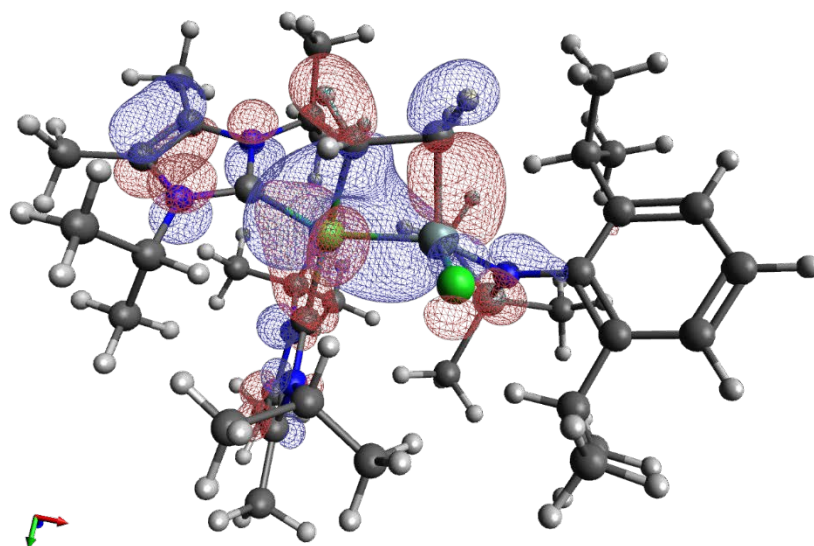

**Figure S62.** HOMO-3 (-3.699 eV).

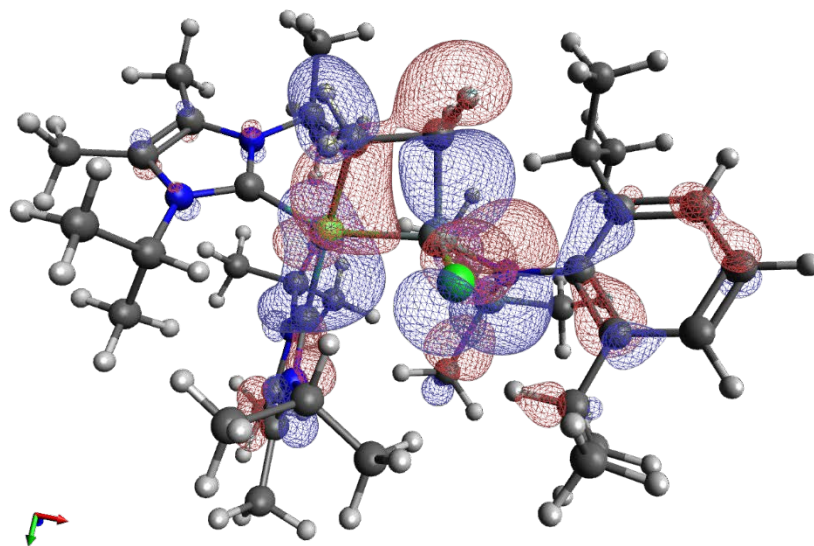

**Figure S63.** HOMO-4 (-4.190 eV).

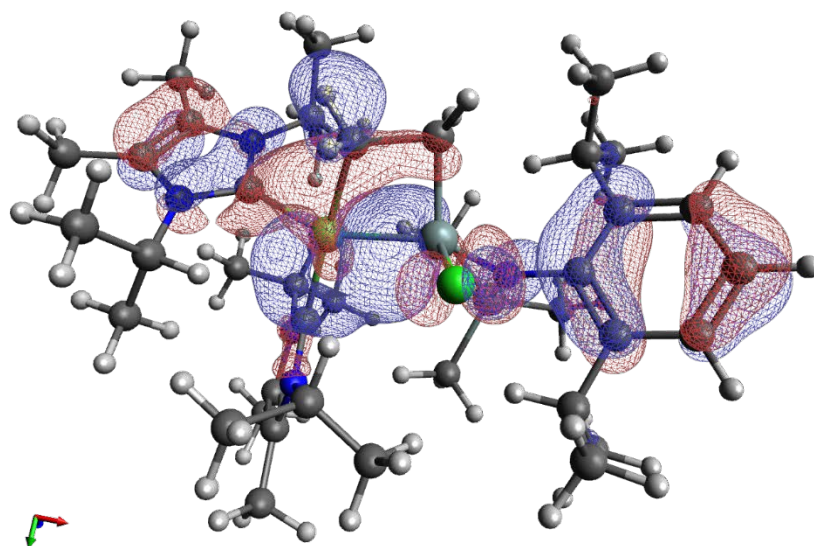

**Figure S64.** HOMO-5 (-4.331 eV).

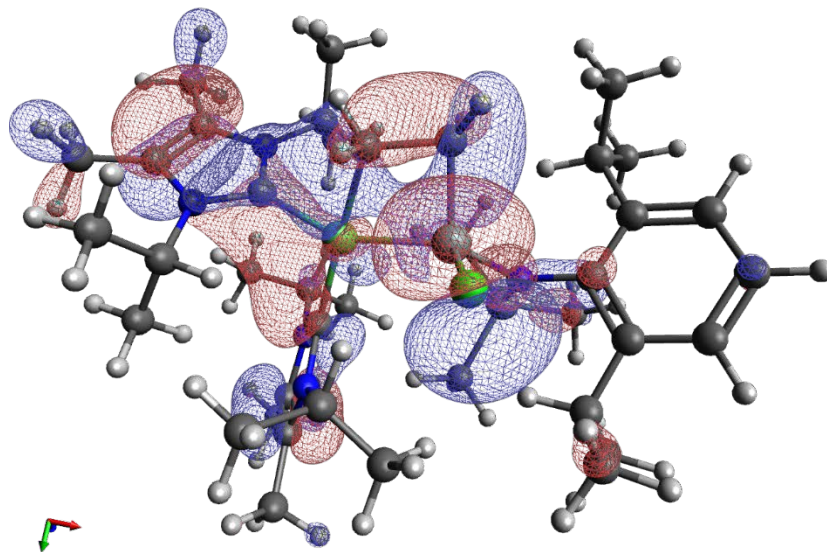

Figure S65. HOMO-11 (-5.692 eV).

### Cartesian coordinates and energies

1

E(RB97D) = -3371.856956 E<sub>h</sub>

Sum of electronic and thermal Enthalpies = -3371.41674 E<sub>h</sub>

Sum of electronic and thermal Free Energies = -3371.41674 E<sub>h</sub>

Number of imaginary frequencies 0

|    |          |          |          |
|----|----------|----------|----------|
| Ni | -0.75050 | -0.04473 | 0.26808  |
| Cl | 1.29840  | -0.80101 | 3.38397  |
| Si | 0.98035  | -0.84012 | 1.20508  |
| Si | 2.83774  | -0.63112 | -1.16196 |
| N  | 2.61456  | -1.03843 | 0.56473  |
| N  | -3.68669 | -0.53064 | 0.13594  |
| N  | -0.49037 | 2.39073  | -1.38472 |
| N  | -0.29826 | 2.85649  | 0.71563  |
| N  | -2.60971 | -2.22019 | -0.66114 |
| C  | -2.39711 | -0.96579 | -0.11821 |
| C  | -0.52584 | 1.78699  | -0.13643 |
| C  | -0.12405 | 4.05165  | 0.02503  |
| C  | -0.23287 | 3.75666  | -1.30360 |
| C  | -3.96018 | -2.54200 | -0.73250 |
| C  | -0.63463 | 1.64135  | -2.62354 |
| H  | -1.11429 | 2.27789  | -3.38285 |
| C  | -1.52394 | -3.09321 | -1.08853 |
| H  | -0.64855 | -2.85646 | -0.46484 |
| C  | -4.64263 | -1.47558 | -0.21837 |
| C  | 4.46378  | -1.42228 | -1.76338 |
| H  | 5.34479  | -1.01761 | -1.23867 |
| H  | 4.59853  | -1.22701 | -2.84153 |
| H  | 4.46021  | -2.51616 | -1.61977 |
| C  | 1.41572  | -1.32123 | -2.21863 |
| H  | 1.38010  | -2.42145 | -2.15463 |

|   |          |          |          |
|---|----------|----------|----------|
| H | 1.55810  | -1.04612 | -3.27954 |
| H | 0.43872  | -0.93271 | -1.88524 |
| C | -3.98110 | 0.74584  | 0.77529  |
| H | -3.12810 | 1.41280  | 0.58411  |
| C | -0.28222 | 2.72279  | 2.16707  |
| H | 0.03922  | 1.70129  | 2.41201  |
| C | 2.94957  | 1.25686  | -1.37835 |
| H | 2.01933  | 1.73592  | -1.03548 |
| H | 3.12094  | 1.54065  | -2.43228 |
| H | 3.78141  | 1.67194  | -0.78324 |
| H | -1.82600 | -4.14196 | -0.94914 |
| H | -1.26847 | -2.92044 | -2.14586 |
| H | -4.10464 | 0.62045  | 1.86309  |
| H | -4.90443 | 1.16690  | 0.34789  |
| H | -5.70481 | -1.31264 | -0.07138 |
| H | -4.31130 | -3.48423 | -1.13892 |
| H | 0.42424  | 3.45086  | 2.59262  |
| H | -1.28500 | 2.89685  | 2.59127  |
| H | 0.05378  | 4.99271  | 0.53396  |
| H | -0.14497 | 4.38375  | -2.18402 |
| H | 0.34435  | 1.29828  | -2.99275 |
| H | -1.26113 | 0.76334  | -2.40792 |
| C | 3.86401  | -1.27173 | 1.32562  |
| H | 4.51721  | -0.37853 | 1.31545  |
| H | 3.63708  | -1.50676 | 2.37352  |
| H | 4.43367  | -2.11233 | 0.89509  |

## TS1

$E(\text{RB97D}) = -3450.389516 E_h$

Sum of electronic and thermal Enthalpies =  $-3449.894436 E_h$

Sum of electronic and thermal Free Energies =  $-3450.001962 E_h$

Number of imaginary frequencies 1,  $\nu = -38.8 \text{ cm}^{-1}$

|    |          |          |          |
|----|----------|----------|----------|
| Ni | -0.97793 | 0.04723  | -0.21208 |
| Cl | 0.61521  | 0.95255  | 2.87226  |
| Si | 0.73311  | -0.37889 | 1.06516  |
| Si | 3.50952  | -1.38663 | 0.07212  |
| N  | -3.29045 | -1.15654 | 1.25534  |
| N  | 0.64259  | 2.13338  | -1.58153 |
| N  | 2.41547  | -0.07781 | 0.54480  |
| N  | -3.78448 | -0.83667 | -0.81938 |
| N  | -0.68438 | 2.92467  | -0.06855 |
| C  | -2.74224 | -0.68922 | 0.07824  |
| C  | -4.60481 | -1.57873 | 1.09036  |
| C  | -0.30715 | 1.72769  | -0.65882 |
| C  | -1.65398 | 3.01877  | 1.01774  |
| H  | -2.31594 | 2.14434  | 0.94430  |
| C  | -4.91911 | -1.37896 | -0.22468 |
| C  | -0.81998 | -2.59033 | -1.71375 |
| H  | -0.49512 | -2.86156 | -0.70857 |
| H  | -1.85243 | -2.83009 | -1.97712 |
| C  | 0.83993  | 3.50874  | -1.55864 |
| C  | 0.01006  | -1.98358 | -2.57848 |
| H  | -0.30946 | -1.69832 | -3.58473 |

|   |          |          |          |
|---|----------|----------|----------|
| H | 1.03824  | -1.74761 | -2.30078 |
| C | -2.54962 | -1.18686 | 2.51520  |
| H | -1.62310 | -1.76440 | 2.38062  |
| C | 0.00736  | 4.00646  | -0.59690 |
| C | 1.37049  | 1.19834  | -2.42846 |
| H | 0.70220  | 0.75900  | -3.18353 |
| C | -3.67115 | -0.48465 | -2.22828 |
| H | -2.81294 | 0.19486  | -2.32972 |
| C | 4.16372  | -1.08030 | -1.69861 |
| H | 3.37283  | -1.22005 | -2.45501 |
| H | 4.98050  | -1.78312 | -1.93933 |
| H | 4.56324  | -0.05884 | -1.81906 |
| C | 5.00428  | -1.42430 | 1.25265  |
| H | 5.54464  | -0.46251 | 1.25176  |
| H | 5.72381  | -2.21135 | 0.96658  |
| H | 4.67798  | -1.62023 | 2.28806  |
| C | 2.62497  | -3.06794 | 0.10934  |
| H | 2.23974  | -3.30504 | 1.11417  |
| H | 3.34026  | -3.86032 | -0.17660 |
| H | 1.77812  | -3.11493 | -0.59275 |
| C | 3.05128  | 1.25454  | 0.67895  |
| H | 3.61552  | 1.34818  | 1.62289  |
| H | 3.74677  | 1.44308  | -0.16039 |
| H | 2.28835  | 2.04634  | 0.66295  |
| H | -2.26563 | -0.16896 | 2.81436  |
| H | -3.18326 | -1.64754 | 3.28623  |
| H | -4.59299 | 0.01634  | -2.56200 |
| H | -3.49779 | -1.38024 | -2.84691 |
| H | -5.83492 | -1.56366 | -0.77548 |
| H | -5.19451 | -1.96729 | 1.91343  |
| H | -1.14344 | 2.99646  | 1.99138  |
| H | -2.23015 | 3.95043  | 0.90684  |
| H | -0.15565 | 5.02055  | -0.24973 |
| H | 1.53883  | 4.00221  | -2.22481 |
| H | 1.77751  | 0.40316  | -1.79227 |
| H | 2.18991  | 1.73536  | -2.92665 |

## IM1

E(RB97D) = -3450.404154 E<sub>h</sub>

Sum of electronic and thermal Enthalpies = -3449.906798 E<sub>h</sub>

Sum of electronic and thermal Free Energies = -3450.00789 E<sub>h</sub>

Number of imaginary frequencies 0

|    |          |          |          |
|----|----------|----------|----------|
| Ni | 0.62083  | 0.08553  | -0.70345 |
| Cl | -0.71625 | -3.02181 | 0.90321  |
| Si | -1.02860 | -0.81685 | 0.62142  |
| Si | -3.82606 | 0.47381  | 0.31421  |
| N  | 0.91448  | 2.95589  | 0.25856  |
| N  | 2.47630  | -2.25886 | -0.33127 |
| N  | -2.68060 | -0.82834 | -0.06074 |
| N  | 2.77732  | 2.15087  | -0.45473 |
| N  | 2.56611  | -0.90170 | 1.33731  |
| C  | 1.44879  | 1.81262  | -0.29077 |
| C  | 1.87153  | 3.94669  | 0.45598  |
| C  | 1.91212  | -1.09357 | 0.13582  |

|   |          |          |          |
|---|----------|----------|----------|
| C | 2.27742  | 0.19251  | 2.26019  |
| H | 2.84898  | 1.09540  | 1.99478  |
| C | 3.05435  | 3.43648  | 0.00303  |
| C | -0.49501 | 0.66449  | -2.28690 |
| H | -1.50608 | 0.96538  | -2.00516 |
| H | 0.05025  | 1.39442  | -2.89553 |
| C | 3.43436  | -2.76626 | 0.53785  |
| C | -0.18497 | -0.71877 | -2.37596 |
| H | 0.63190  | -1.04508 | -3.03094 |
| H | -0.96641 | -1.46911 | -2.24118 |
| C | -0.49546 | 3.09576  | 0.60021  |
| H | -1.02027 | 2.23779  | 0.16648  |
| C | 3.49267  | -1.90601 | 1.59578  |
| C | 2.02744  | -2.94004 | -1.54103 |
| H | 2.37715  | -2.40919 | -2.43883 |
| C | 3.78627  | 1.23628  | -0.98053 |
| H | 3.27710  | 0.49417  | -1.60639 |
| C | -3.88125 | 1.80370  | -1.05688 |
| H | -2.95830 | 2.40470  | -1.09548 |
| H | -4.72663 | 2.49547  | -0.89226 |
| H | -4.01526 | 1.34477  | -2.05133 |
| C | -5.57679 | -0.27050 | 0.44658  |
| H | -5.93864 | -0.65866 | -0.51972 |
| H | -6.29141 | 0.49989  | 0.78510  |
| H | -5.60354 | -1.09928 | 1.17396  |
| C | -3.41250 | 1.30158  | 1.97792  |
| H | -3.54159 | 0.58584  | 2.80669  |
| H | -4.09480 | 2.15306  | 2.15339  |
| H | -2.37917 | 1.67385  | 2.02672  |
| C | -3.22446 | -1.86794 | -0.96711 |
| H | -3.50250 | -1.43534 | -1.94735 |
| H | -2.47621 | -2.65355 | -1.13906 |
| H | -4.11896 | -2.35311 | -0.53977 |
| H | -0.63296 | 3.08927  | 1.69276  |
| H | -0.88936 | 4.03685  | 0.18655  |
| H | 4.30422  | 0.71194  | -0.16174 |
| H | 4.51502  | 1.80378  | -1.57798 |
| H | 4.04542  | 3.87331  | -0.05572 |
| H | 1.62650  | 4.91592  | 0.87647  |
| H | 1.20429  | 0.41404  | 2.20479  |
| H | 2.54405  | -0.12775 | 3.27756  |
| H | 4.08343  | -1.92797 | 2.50463  |
| H | 3.96591  | -3.68920 | 0.33574  |
| H | 0.93261  | -2.96839 | -1.53675 |
| H | 2.43125  | -3.96193 | -1.53625 |

## TS2

$E(\text{RB97D}) = -3450.376761 E_h$

Sum of electronic and thermal Enthalpies =  $-3449.881862 E_h$

Sum of electronic and thermal Free Energies =  $-3449.98274 E_h$

Number of imaginary frequencies 1,  $\nu = -314.6 \text{ cm}^{-1}$

|    |          |          |          |
|----|----------|----------|----------|
| Ni | -1.03650 | -0.09591 | -0.42886 |
| Cl | 1.62986  | 2.74993  | -0.03655 |
| Si | 1.12360  | 0.58971  | -0.07774 |

|    |          |          |          |
|----|----------|----------|----------|
| Si | 3.16180  | -1.64449 | 0.56281  |
| N  | -2.14774 | -2.75339 | -0.04126 |
| N  | -2.02623 | 2.62404  | 0.38291  |
| N  | 2.69891  | -0.20359 | -0.33429 |
| N  | -3.70933 | -1.34035 | -0.52903 |
| N  | -1.89045 | 1.27993  | 2.06426  |
| C  | -2.34267 | -1.42238 | -0.35473 |
| C  | -3.34488 | -3.46078 | -0.02110 |
| C  | -1.75195 | 1.31349  | 0.69769  |
| C  | -1.53082 | 0.09848  | 2.83965  |
| H  | -2.09990 | -0.76657 | 2.47226  |
| C  | -4.33103 | -2.57125 | -0.33571 |
| C  | -0.19473 | -0.84303 | -2.05398 |
| H  | 0.50483  | -1.68279 | -1.95122 |
| H  | -0.99704 | -1.06628 | -2.77406 |
| C  | -2.26515 | 3.38900  | 1.52118  |
| C  | 0.44631  | 0.50300  | -2.08771 |
| H  | -0.18239 | 1.31115  | -2.48551 |
| H  | 1.42346  | 0.54932  | -2.59499 |
| C  | -0.84213 | -3.33646 | 0.25322  |
| H  | -0.10179 | -2.53226 | 0.16253  |
| C  | -2.17905 | 2.53743  | 2.58545  |
| C  | -1.89727 | 3.15957  | -0.96796 |
| H  | -2.12857 | 2.35302  | -1.67703 |
| C  | -4.40039 | -0.12966 | -0.95925 |
| H  | -3.83381 | 0.73226  | -0.58841 |
| C  | 2.91365  | -3.21303 | -0.50649 |
| H  | 1.85621  | -3.34882 | -0.78873 |
| H  | 3.24589  | -4.12655 | 0.01850  |
| H  | 3.49433  | -3.14058 | -1.44264 |
| C  | 5.01692  | -1.55587 | 1.00856  |
| H  | 5.66322  | -1.55316 | 0.11496  |
| H  | 5.30929  | -2.42557 | 1.62275  |
| H  | 5.24060  | -0.64280 | 1.58591  |
| C  | 2.17845  | -1.82595 | 2.18375  |
| H  | 2.23629  | -0.90100 | 2.78072  |
| H  | 2.61039  | -2.64851 | 2.78330  |
| H  | 1.11401  | -2.04461 | 2.01485  |
| C  | 3.60625  | 0.19933  | -1.43033 |
| H  | 3.48060  | -0.43093 | -2.33336 |
| H  | 3.41838  | 1.24665  | -1.71328 |
| H  | 4.66199  | 0.13225  | -1.11697 |
| H  | -0.82895 | -3.74575 | 1.27556  |
| H  | -0.61430 | -4.13882 | -0.46521 |
| H  | -5.41647 | -0.12597 | -0.53785 |
| H  | -4.45921 | -0.08558 | -2.05886 |
| H  | -5.40331 | -2.69787 | -0.43521 |
| H  | -3.38656 | -4.51621 | 0.22356  |
| H  | -0.45676 | -0.10287 | 2.69753  |
| H  | -1.76104 | 0.28021  | 3.89902  |
| H  | -2.30898 | 2.70627  | 3.64860  |
| H  | -2.48104 | 4.45003  | 1.46960  |
| H  | -0.86607 | 3.50201  | -1.13862 |
| H  | -2.60489 | 3.99182  | -1.09956 |

E(RB97D) = -3450.412696 E<sub>h</sub>

Sum of electronic and thermal Enthalpies = -3449.916141 E<sub>h</sub>

Sum of electronic and thermal Free Energies = -3450.017285 E<sub>h</sub>

Number of imaginary frequencies 0

|    |          |          |          |
|----|----------|----------|----------|
| Ni | 0.65383  | 0.00460  | -0.51682 |
| Cl | -2.16011 | -2.65393 | -1.05293 |
| Si | -1.41434 | -0.57491 | -1.15015 |
| Si | -2.98629 | 1.07513  | 1.04078  |
| N  | 2.11387  | 2.54252  | -0.04937 |
| N  | 1.31862  | -2.71015 | 0.40771  |
| N  | -2.76867 | 0.40382  | -0.56413 |
| N  | 3.48113  | 0.99666  | -0.66978 |
| N  | 1.52694  | -1.31756 | 2.04199  |
| C  | 2.15196  | 1.20508  | -0.38088 |
| C  | 3.37104  | 3.13604  | -0.12953 |
| C  | 1.16429  | -1.36991 | 0.70900  |
| C  | 1.62297  | -0.09135 | 2.82421  |
| H  | 1.69558  | 0.74663  | 2.12180  |
| C  | 4.23635  | 2.15975  | -0.53265 |
| C  | -0.01576 | 0.94078  | -2.20467 |
| H  | -0.46738 | 1.92417  | -1.99267 |
| H  | 0.89326  | 1.11236  | -2.81098 |
| C  | 1.73188  | -3.45091 | 1.50837  |
| C  | -1.04831 | -0.01523 | -2.90866 |
| H  | -0.51620 | -0.79014 | -3.48501 |
| H  | -1.79093 | 0.46935  | -3.56787 |
| C  | 0.89777  | 3.22200  | 0.38855  |
| H  | 0.04371  | 2.61461  | 0.06642  |
| C  | 1.85865  | -2.57371 | 2.54478  |
| C  | 1.17831  | -3.27566 | -0.93221 |
| H  | 0.81388  | -2.48301 | -1.59571 |
| C  | 3.99783  | -0.28264 | -1.14363 |
| H  | 3.30482  | -1.06433 | -0.80865 |
| C  | -3.16665 | 2.97485  | 0.91996  |
| H  | -2.25277 | 3.43274  | 0.50383  |
| H  | -3.35759 | 3.43140  | 1.90748  |
| H  | -4.00362 | 3.25778  | 0.25869  |
| C  | -4.56731 | 0.37717  | 1.84675  |
| H  | -5.46373 | 0.60686  | 1.24638  |
| H  | -4.72736 | 0.79391  | 2.85675  |
| H  | -4.50133 | -0.72045 | 1.93619  |
| C  | -1.49016 | 0.66786  | 2.12890  |
| H  | -1.37303 | -0.41984 | 2.25460  |
| H  | -1.59485 | 1.13096  | 3.12680  |
| H  | -0.56284 | 1.03596  | 1.66499  |
| C  | -3.98989 | 0.40449  | -1.40429 |
| H  | -3.72626 | 0.33593  | -2.47176 |
| H  | -4.65628 | -0.44379 | -1.16332 |
| H  | -4.56189 | 1.34137  | -1.26957 |
| H  | 0.88017  | 3.32525  | 1.48580  |
| H  | 0.84610  | 4.21964  | -0.07197 |
| H  | 4.99843  | -0.45506 | -0.71906 |
| H  | 4.05814  | -0.29619 | -2.24359 |
| H  | 5.30091  | 2.18865  | -0.73769 |
| H  | 3.53419  | 4.18167  | 0.10730  |



|   |         |          |          |
|---|---------|----------|----------|
| H | 0.73615 | 0.04426  | 3.45951  |
| H | 2.52797 | -0.13393 | 3.44976  |
| H | 2.14516 | -2.72406 | 3.57980  |
| H | 1.89526 | -4.52140 | 1.45333  |
| H | 0.44763 | -4.09481 | -0.92284 |
| H | 2.15718 | -3.64034 | -1.28588 |

### TS3

E(RB97D) = -3528.932355 E<sub>h</sub>

Sum of electronic and thermal Enthalpies = -3528.378246 E<sub>h</sub>

Sum of electronic and thermal Free Energies = -3528.479471 E<sub>h</sub>

Number of imaginary frequencies 1,  $\nu = -109.3 \text{ cm}^{-1}$

|    |          |          |          |
|----|----------|----------|----------|
| Ni | 0.45059  | -0.22640 | -0.67947 |
| Cl | -2.36725 | -0.42585 | 1.96722  |
| Si | -1.76621 | -0.47047 | -0.20392 |
| Si | -3.52739 | 1.96972  | -1.22706 |
| N  | 2.83568  | -2.14742 | -0.33106 |
| N  | 0.60842  | 2.49019  | 0.80142  |
| N  | -3.15760 | 0.24509  | -1.06181 |
| N  | 2.17245  | -1.22273 | 1.49653  |
| N  | 2.33882  | 2.06544  | -0.40337 |
| C  | 1.93138  | -1.21505 | 0.13902  |
| C  | 3.59496  | -2.70863 | 0.69266  |
| C  | 0.06268  | 0.77860  | -2.88944 |
| H  | -0.97344 | 0.44672  | -2.94054 |
| H  | 0.22239  | 1.82262  | -2.62996 |
| C  | 1.10643  | 1.52626  | -0.05775 |
| C  | 1.09133  | 0.00542  | -3.33243 |
| H  | 2.10791  | 0.38772  | -3.41471 |
| H  | 0.91863  | -1.00826 | -3.69599 |
| C  | 3.31324  | 1.45517  | -1.29942 |
| H  | 3.07175  | 0.39257  | -1.38742 |
| C  | 3.17353  | -2.12089 | 1.84914  |
| C  | -0.35474 | -2.00395 | -1.33688 |
| H  | -0.58753 | -1.81819 | -2.39772 |
| H  | 0.39934  | -2.80490 | -1.28027 |
| C  | 1.48435  | 3.55670  | 0.97250  |
| C  | -1.65894 | -2.32186 | -0.55586 |
| H  | -1.43951 | -2.86476 | 0.37741  |
| H  | -2.41747 | -2.89078 | -1.12341 |
| C  | 2.98654  | -2.51693 | -1.73177 |
| H  | 2.37473  | -1.82599 | -2.31959 |
| C  | 2.57703  | 3.29173  | 0.20486  |
| C  | -0.64587 | 2.40775  | 1.54253  |
| H  | -1.43955 | 2.05497  | 0.88313  |
| C  | 1.44143  | -0.39344 | 2.45339  |
| H  | 0.38490  | -0.37110 | 2.16107  |
| C  | -4.29883 | 2.65364  | 0.38175  |
| H  | -5.21824 | 2.10110  | 0.63953  |
| H  | -4.56902 | 3.71974  | 0.27630  |
| H  | -3.61659 | 2.55331  | 1.24133  |
| C  | -2.01099 | 3.02259  | -1.68749 |
| H  | -1.10005 | 2.75058  | -1.13980 |
| H  | -2.23607 | 4.08395  | -1.48161 |

|   |          |          |          |
|---|----------|----------|----------|
| H | -1.79166 | 2.92934  | -2.76286 |
| C | -4.80726 | 2.19865  | -2.62463 |
| H | -4.47966 | 1.69496  | -3.55024 |
| H | -4.92830 | 3.27234  | -2.85189 |
| H | -5.80065 | 1.80258  | -2.35801 |
| C | -4.40474 | -0.56924 | -1.00024 |
| H | -4.99774 | -0.35985 | -0.08959 |
| H | -5.03883 | -0.37409 | -1.88162 |
| H | -4.16303 | -1.64179 | -0.99530 |
| H | 4.04511  | -2.43730 | -2.02732 |
| H | 2.63651  | -3.54682 | -1.90092 |
| H | 1.84249  | 0.63127  | 2.45785  |
| H | 1.54427  | -0.83733 | 3.45358  |
| H | 3.48031  | -2.26549 | 2.87907  |
| H | 4.34661  | -3.46786 | 0.50712  |
| H | 3.27400  | 1.92578  | -2.29413 |
| H | 4.32119  | 1.58419  | -0.87619 |
| H | 3.48575  | 3.85642  | 0.02879  |
| H | 1.24516  | 4.39566  | 1.61586  |
| H | -0.89569 | 3.41169  | 1.91273  |
| H | -0.56212 | 1.70712  | 2.38193  |

## IM2

$E(\text{RB97D}) = -3528.939723 E_h$

Sum of electronic and thermal Enthalpies =  $-3528.384341 E_h$

Sum of electronic and thermal Free Energies =  $-3528.485495 E_h$

Number of imaginary frequencies 0

|    |          |          |          |
|----|----------|----------|----------|
| Ni | 0.38869  | -0.27001 | -0.88078 |
| Cl | -2.38453 | 0.50321  | 2.10105  |
| Si | -1.76964 | -0.32557 | 0.11054  |
| Si | -3.94425 | 1.15358  | -1.73000 |
| N  | 2.45553  | -2.30871 | 0.04155  |
| N  | 1.05218  | 2.61186  | 0.05147  |
| N  | -3.24600 | -0.22395 | -0.88844 |
| N  | 1.89952  | -0.94439 | 1.61215  |
| N  | 2.77410  | 1.53667  | -0.65909 |
| C  | 1.63515  | -1.22670 | 0.28976  |
| C  | 3.19399  | -2.67583 | 1.16236  |
| C  | -0.32794 | 0.38675  | -2.71269 |
| H  | -1.31715 | -0.04190 | -2.87689 |
| H  | -0.28244 | 1.47720  | -2.76177 |
| C  | 1.40505  | 1.40078  | -0.50095 |
| C  | 0.83669  | -0.36484 | -2.96531 |
| H  | 1.76429  | 0.14857  | -3.23049 |
| H  | 0.74284  | -1.39288 | -3.32594 |
| C  | 3.68793  | 0.49386  | -1.11977 |
| H  | 3.11394  | -0.23214 | -1.69802 |
| C  | 2.84348  | -1.80890 | 2.15504  |
| C  | -0.60994 | -2.06888 | -1.01370 |
| H  | -1.25087 | -2.01534 | -1.90996 |
| H  | 0.12454  | -2.87266 | -1.16468 |
| C  | 2.14606  | 3.44763  | 0.24181  |
| C  | -1.44051 | -2.18646 | 0.28727  |
| H  | -0.77026 | -2.36845 | 1.14295  |
| H  | -2.23374 | -2.95490 | 0.28157  |

|   |          |          |          |
|---|----------|----------|----------|
| C | 2.62711  | -2.94434 | -1.25929 |
| H | 2.10488  | -2.32748 | -1.99690 |
| C | 3.23784  | 2.76631  | -0.20647 |
| C | -0.28920 | 2.98814  | 0.48349  |
| H | -0.95882 | 2.17225  | 0.20766  |
| C | 1.32242  | 0.17591  | 2.35326  |
| H | 0.33377  | 0.39477  | 1.94107  |
| C | -5.67701 | 1.54729  | -1.02806 |
| H | -6.37299 | 0.69710  | -1.12324 |
| H | -6.13109 | 2.40598  | -1.55402 |
| H | -5.60775 | 1.80132  | 0.04324  |
| C | -2.90235 | 2.73003  | -1.55101 |
| H | -2.91879 | 3.09699  | -0.51293 |
| H | -3.33629 | 3.51706  | -2.19265 |
| H | -1.85539 | 2.58700  | -1.85082 |
| C | -4.13967 | 0.74037  | -3.58503 |
| H | -3.15760 | 0.62792  | -4.07458 |
| H | -4.69699 | 1.52989  | -4.11982 |
| H | -4.68933 | -0.20636 | -3.72580 |
| C | -4.16129 | -1.39163 | -0.81766 |
| H | -3.69283 | -2.29219 | -1.25076 |
| H | -4.45154 | -1.62129 | 0.22260  |
| H | -5.09179 | -1.20970 | -1.38304 |
| H | 3.70056  | -3.00120 | -1.50040 |
| H | 2.19992  | -3.95872 | -1.25746 |
| H | 1.96554  | 1.06552  | 2.26292  |
| H | 1.22747  | -0.10932 | 3.41024  |
| H | 3.15860  | -1.73870 | 3.19010  |
| H | 3.88048  | -3.51516 | 1.15233  |
| H | 4.47011  | 0.95362  | -1.74236 |
| H | 4.15118  | -0.01558 | -0.26028 |
| H | 4.28524  | 3.04190  | -0.25963 |
| H | 2.04207  | 4.44228  | 0.66042  |
| H | -0.59579 | 3.91795  | -0.01564 |
| H | -0.30908 | 3.12019  | 1.57523  |

#### TS4

E(RB97D) = -3528.912393 E<sub>h</sub>

Sum of electronic and thermal Enthalpies = -3528.359667 E<sub>h</sub>

Sum of electronic and thermal Free Energies = -3528.462209 E<sub>h</sub>

Number of imaginary frequencies 1,  $\nu = -191.9 \text{ cm}^{-1}$

|    |          |          |          |
|----|----------|----------|----------|
| Ni | 0.60671  | -0.31410 | -0.85850 |
| Cl | -2.34167 | 0.24824  | 1.94957  |
| Si | -1.98089 | -0.29408 | -0.21336 |
| Si | -4.57751 | 1.34248  | -0.93018 |
| N  | 2.46933  | -2.21410 | 0.38999  |
| N  | 1.23630  | 2.58206  | -0.06019 |
| N  | -3.63600 | -0.14306 | -0.86281 |
| N  | 1.74798  | -0.79857 | 1.85351  |
| N  | 2.97146  | 1.46139  | -0.66106 |
| C  | 1.56460  | -1.17527 | 0.53943  |
| C  | 3.17220  | -2.46067 | 1.56560  |
| C  | -0.99346 | 0.60337  | -2.13278 |
| H  | -1.85020 | 0.07329  | -2.56462 |

|   |          |          |          |
|---|----------|----------|----------|
| H | -1.20323 | 1.66599  | -1.98736 |
| C | 1.60537  | 1.34174  | -0.52702 |
| C | 0.29850  | 0.27886  | -2.74758 |
| H | 0.92676  | 1.12047  | -3.05642 |
| H | 0.31260  | -0.56215 | -3.44821 |
| C | 3.82571  | 0.38326  | -1.14458 |
| H | 3.22989  | -0.21716 | -1.84417 |
| C | 2.71698  | -1.56609 | 2.48847  |
| C | -0.29710 | -2.12214 | -1.25995 |
| H | -0.66702 | -2.11381 | -2.29920 |
| H | 0.35247  | -2.99862 | -1.13538 |
| C | 2.32945  | 3.43095  | 0.09524  |
| C | -1.45897 | -2.13435 | -0.25543 |
| H | -1.08928 | -2.39451 | 0.75094  |
| H | -2.26721 | -2.84590 | -0.51252 |
| C | 2.80823  | -2.86312 | -0.87416 |
| H | 2.31375  | -2.30350 | -1.67696 |
| C | 3.43018  | 2.71846  | -0.28182 |
| C | -0.13757 | 2.98590  | 0.21502  |
| H | -0.75033 | 2.08051  | 0.27321  |
| C | 1.10965  | 0.35710  | 2.47406  |
| H | 0.27839  | 0.66339  | 1.83727  |
| C | -5.99941 | 1.29028  | 0.33745  |
| H | -6.65238 | 0.41530  | 0.17704  |
| H | -6.63235 | 2.19331  | 0.27714  |
| H | -5.59260 | 1.21972  | 1.35973  |
| C | -3.48973 | 2.85795  | -0.55607 |
| H | -3.01515 | 2.77371  | 0.43384  |
| H | -4.12217 | 3.76308  | -0.55173 |
| H | -2.70380 | 3.00823  | -1.31275 |
| C | -5.32266 | 1.53972  | -2.67752 |
| H | -4.52526 | 1.64328  | -3.43323 |
| H | -5.97005 | 2.43219  | -2.74089 |
| H | -5.93627 | 0.66747  | -2.96120 |
| C | -4.42172 | -1.38371 | -1.05291 |
| H | -3.90810 | -2.08213 | -1.73572 |
| H | -4.60963 | -1.91350 | -0.10049 |
| H | -5.40443 | -1.16342 | -1.50589 |
| H | 3.90130  | -2.83997 | -1.00857 |
| H | 2.46021  | -3.90683 | -0.88374 |
| H | 1.83651  | 1.17986  | 2.57031  |
| H | 0.72019  | 0.07988  | 3.46370  |
| H | 2.97656  | -1.41733 | 3.53066  |
| H | 3.91439  | -3.24803 | 1.63633  |
| H | 4.69877  | 0.81743  | -1.65400 |
| H | 4.15935  | -0.25584 | -0.31304 |
| H | 4.47975  | 2.98770  | -0.32202 |
| H | 2.22041  | 4.45236  | 0.44237  |
| H | -0.52147 | 3.62870  | -0.59068 |
| H | -0.17887 | 3.52981  | 1.17003  |

8

E(RB97D) = -3528.969959 E<sub>h</sub>

Sum of electronic and thermal Enthalpies = -3528.415458 E<sub>h</sub>

Sum of electronic and thermal Free Energies = -3528.51941 E<sub>h</sub>

Number of imaginary frequencies 0

|    |          |          |          |
|----|----------|----------|----------|
| Ni | 0.81215  | -0.17976 | -0.74447 |
| Cl | -2.31267 | 0.66431  | 1.76841  |
| Si | -2.56186 | -0.16135 | -0.24482 |
| Si | -5.36352 | 0.77581  | -1.24922 |
| N  | 2.59748  | -2.44480 | 0.04175  |
| N  | 1.70904  | 2.54062  | 0.16875  |
| N  | -4.27954 | -0.39978 | -0.47291 |
| N  | 1.97629  | -1.27271 | 1.73938  |
| N  | 3.30848  | 1.40990  | -0.72208 |
| C  | 1.83281  | -1.34603 | 0.37272  |
| C  | 3.19955  | -3.01948 | 1.15989  |
| C  | -1.86010 | 1.14806  | -1.42954 |
| H  | -2.55108 | 1.24830  | -2.28828 |
| H  | -1.92996 | 2.10790  | -0.89148 |
| C  | 1.96665  | 1.31993  | -0.41401 |
| C  | -0.39107 | 0.92685  | -1.91728 |
| H  | 0.04428  | 1.92354  | -2.11302 |
| H  | -0.41691 | 0.39774  | -2.88651 |
| C  | 4.05609  | 0.31624  | -1.33020 |
| H  | 3.38320  | -0.21732 | -2.01239 |
| C  | 2.80473  | -2.27565 | 2.23472  |
| C  | -0.40186 | -1.72039 | -1.19520 |
| H  | -0.76980 | -1.61629 | -2.23276 |
| H  | 0.13008  | -2.68853 | -1.14397 |
| C  | 2.84244  | 3.34777  | 0.22518  |
| C  | -1.61333 | -1.80004 | -0.23230 |
| H  | -1.27033 | -2.02985 | 0.79151  |
| H  | -2.31240 | -2.61246 | -0.52257 |
| C  | 2.79623  | -2.90593 | -1.32670 |
| H  | 2.14174  | -2.30784 | -1.97236 |
| C  | 3.85743  | 2.63056  | -0.33909 |
| C  | 0.39559  | 2.93853  | 0.66192  |
| H  | -0.27702 | 2.08532  | 0.54649  |
| C  | 1.37913  | -0.20571 | 2.53945  |
| H  | 0.43212  | 0.08994  | 2.07350  |
| C  | -7.14625 | 0.42336  | -0.67099 |
| H  | -7.50537 | -0.56420 | -1.00500 |
| H  | -7.82922 | 1.18310  | -1.08886 |
| H  | -7.23637 | 0.45914  | 0.42746  |
| C  | -4.91860 | 2.56094  | -0.76128 |
| H  | -4.78725 | 2.64312  | 0.33040  |
| H  | -5.72427 | 3.25354  | -1.06315 |
| H  | -3.98643 | 2.90282  | -1.23643 |
| C  | -5.30931 | 0.59396  | -3.14457 |
| H  | -4.29818 | 0.77080  | -3.54664 |
| H  | -5.99443 | 1.31079  | -3.63138 |
| H  | -5.61301 | -0.42273 | -3.44740 |
| C  | -4.90034 | -1.46826 | 0.34723  |
| H  | -4.17829 | -2.27827 | 0.53942  |
| H  | -5.24817 | -1.09062 | 1.32614  |
| H  | -5.76256 | -1.91558 | -0.17313 |
| H  | 3.84817  | -2.76886 | -1.62749 |
| H  | 2.52928  | -3.97025 | -1.41257 |
| H  | 2.05166  | 0.66590  | 2.58161  |
| H  | 1.19159  | -0.57914 | 3.55640  |

|   |         |          |          |
|---|---------|----------|----------|
| H | 3.01769 | -2.38014 | 3.29300  |
| H | 3.82876 | -3.90025 | 1.09213  |
| H | 4.91079 | 0.72790  | -1.88675 |
| H | 4.41420 | -0.38728 | -0.56227 |
| H | 4.89938 | 2.87716  | -0.51178 |
| H | 2.82067 | 4.34755  | 0.64480  |
| H | 0.01295 | 3.79332  | 0.08297  |
| H | 0.45813 | 3.21448  | 1.72600  |

### TS1'

E(RB97D) = -3486.289415 E<sub>h</sub>

Sum of electronic and thermal Enthalpies = -3485.817662 E<sub>h</sub>

Sum of electronic and thermal Free Energies = -3485.919982 E<sub>h</sub>

Number of imaginary frequencies 1,  $\nu = -213.0 \text{ cm}^{-1}$

|    |          |          |          |
|----|----------|----------|----------|
| Ni | -0.74596 | 0.26002  | 0.03469  |
| Si | 0.70603  | -1.12356 | 0.75645  |
| Si | 2.98676  | -0.36448 | -1.02264 |
| Cl | 0.44631  | -1.79968 | 2.79661  |
| O  | 0.47430  | -3.34084 | -0.08044 |
| N  | -3.54264 | -0.57530 | 0.35258  |
| C  | -0.17741 | 2.02426  | 0.37250  |
| N  | 0.16243  | 3.00277  | -0.54703 |
| N  | -3.08070 | -0.49090 | -1.74951 |
| N  | 0.03463  | 2.66257  | 1.58110  |
| N  | 2.40293  | -1.25902 | 0.40325  |
| C  | -2.38678 | -0.23628 | -3.00504 |
| H  | -1.30767 | -0.30064 | -2.81804 |
| C  | -0.25897 | 2.04744  | 2.86889  |
| H  | -0.11395 | 0.96402  | 2.77633  |
| C  | -2.52765 | -0.22343 | -0.51353 |
| C  | -0.55281 | -2.62895 | -0.37538 |
| H  | -0.72997 | -2.28337 | -1.41845 |
| C  | 0.57798  | 4.18131  | 0.06845  |
| C  | 0.16965  | 2.76874  | -1.98206 |
| H  | -0.62545 | 2.04493  | -2.20901 |
| C  | -4.67969 | -1.01382 | -0.31784 |
| C  | -4.38982 | -0.95894 | -1.65120 |
| C  | 1.71332  | -0.46912 | -2.43808 |
| H  | 1.52507  | -1.52581 | -2.69162 |
| H  | 2.06275  | 0.05217  | -3.34779 |
| H  | 0.75244  | -0.02600 | -2.12617 |
| C  | 0.48416  | 3.96904  | 1.41280  |
| C  | 3.33625  | 1.45219  | -0.57855 |
| H  | 2.44569  | 1.93431  | -0.14968 |
| H  | 3.65693  | 2.03564  | -1.46061 |
| H  | 4.14242  | 1.51252  | 0.17263  |
| C  | -3.39861 | -0.47393 | 1.80291  |
| H  | -2.41501 | -0.87032 | 2.09117  |
| C  | 4.60192  | -1.17411 | -1.62156 |
| H  | 5.41416  | -1.08331 | -0.88164 |
| H  | 4.94191  | -0.68630 | -2.55165 |
| H  | 4.45983  | -2.24626 | -1.83498 |
| C  | 3.24678  | -2.35751 | 0.93601  |
| H  | 4.30195  | -2.04402 | 0.98516  |
| H  | 2.92259  | -2.61945 | 1.95249  |

|   |          |          |          |
|---|----------|----------|----------|
| H | 3.16605  | -3.25954 | 0.30747  |
| H | -1.49110 | -2.70580 | 0.21848  |
| H | -4.19442 | -1.06006 | 2.28403  |
| H | -3.46844 | 0.57839  | 2.12091  |
| H | -5.57068 | -1.34195 | 0.20607  |
| H | -4.97931 | -1.22361 | -2.52202 |
| H | -2.67672 | -0.99527 | -3.74649 |
| H | -2.63300 | 0.76599  | -3.39503 |
| H | -1.30010 | 2.24960  | 3.17136  |
| H | 0.42636  | 2.45012  | 3.62911  |
| H | 0.68922  | 4.62103  | 2.25462  |
| H | 0.90473  | 5.04592  | -0.49842 |
| H | -0.02191 | 3.71649  | -2.50740 |
| H | 1.13517  | 2.35191  | -2.30684 |

4'

E(RB97D) = -3486.348472 E<sub>h</sub>

Sum of electronic and thermal Enthalpies = -3485.874081 E<sub>h</sub>

Sum of electronic and thermal Free Energies = -3485.972521 E<sub>h</sub>

Number of imaginary frequencies 0

|    |          |          |          |
|----|----------|----------|----------|
| Ni | -0.62421 | -0.12206 | 0.59016  |
| Si | 1.43935  | 0.04333  | 1.35374  |
| Si | 2.77882  | -0.89280 | -1.26736 |
| Cl | 2.22288  | 1.96607  | 2.02909  |
| O  | 1.17995  | -0.84503 | 2.76505  |
| N  | -3.59967 | -0.31599 | 0.48776  |
| C  | -0.79763 | 1.30476  | -0.67049 |
| N  | -0.98369 | 1.27248  | -2.03725 |
| N  | -2.70894 | -2.22019 | 0.02243  |
| N  | -0.83488 | 2.65555  | -0.39123 |
| N  | 2.78551  | -0.67497 | 0.47422  |
| C  | -1.72831 | -3.26973 | -0.24255 |
| H  | -0.77054 | -2.94542 | 0.17677  |
| C  | -0.79066 | 3.21647  | 0.95649  |
| H  | -0.55803 | 2.40480  | 1.65450  |
| C  | -2.37321 | -0.92848 | 0.36112  |
| C  | -0.17303 | -1.16191 | 2.24293  |
| H  | -0.26331 | -2.25847 | 2.14167  |
| C  | -1.10375 | 2.54830  | -2.58162 |
| C  | -0.99711 | 0.04344  | -2.81825 |
| H  | -1.37751 | -0.76049 | -2.17642 |
| C  | -4.65200 | -1.18687 | 0.22169  |
| C  | -4.08756 | -2.39381 | -0.07634 |
| C  | 1.39119  | -2.11844 | -1.72363 |
| H  | 1.60916  | -3.11000 | -1.29092 |
| H  | 1.25253  | -2.23986 | -2.81290 |
| H  | 0.44332  | -1.76607 | -1.28616 |
| C  | -1.01886 | 3.42191  | -1.53713 |
| C  | 2.51182  | 0.74942  | -2.20022 |
| H  | 1.61242  | 1.27239  | -1.84189 |
| H  | 2.41126  | 0.59332  | -3.29000 |
| H  | 3.36976  | 1.42320  | -2.03518 |
| C  | -3.74930 | 1.10221  | 0.80074  |
| H  | -2.90806 | 1.40187  | 1.43611  |

|   |          |          |          |
|---|----------|----------|----------|
| C | 4.44658  | -1.63084 | -1.82047 |
| H | 5.29324  | -0.97342 | -1.56133 |
| H | 4.45241  | -1.76726 | -2.91611 |
| H | 4.63416  | -2.61634 | -1.36191 |
| C | 4.01237  | -0.90182 | 1.27694  |
| H | 4.64618  | -1.67367 | 0.81291  |
| H | 4.60917  | 0.02217  | 1.38419  |
| H | 3.74156  | -1.25358 | 2.28592  |
| H | -0.92346 | -0.81166 | 2.97917  |
| H | -4.69788 | 1.25682  | 1.33485  |
| H | -3.73612 | 1.70750  | -0.11914 |
| H | -5.69011 | -0.88027 | 0.28837  |
| H | -4.53424 | -3.35003 | -0.32516 |
| H | -2.05426 | -4.20579 | 0.23465  |
| H | -1.61332 | -3.43120 | -1.32617 |
| H | -1.76552 | 3.66720  | 1.20679  |
| H | 0.00080  | 3.97500  | 1.02316  |
| H | -1.07214 | 4.50433  | -1.50366 |
| H | -1.22820 | 2.71328  | -3.64601 |
| H | -1.65725 | 0.17674  | -3.68815 |
| H | 0.01714  | -0.21374 | -3.15362 |

## TS1''

E(RB97D) = -3449.127882 E<sub>h</sub>

Sum of electronic and thermal Enthalpies = -3448.657474 E<sub>h</sub>

Sum of electronic and thermal Free Energies = -3448.763281 E<sub>h</sub>

Number of imaginary frequencies 1,  $\nu = -97.0 \text{ cm}^{-1}$

|    |          |          |          |
|----|----------|----------|----------|
| Ni | 0.98489  | 0.06614  | 0.26550  |
| Cl | -0.47732 | -0.23868 | -2.98490 |
| Si | -0.70394 | -0.81834 | -0.82379 |
| Si | -3.49203 | -1.35753 | 0.38612  |
| N  | 3.26508  | -1.61785 | -0.78963 |
| N  | -0.82717 | 2.36656  | 0.85336  |
| N  | -2.38686 | -0.30969 | -0.52011 |
| N  | 3.86556  | -0.40388 | 0.88774  |
| N  | 0.50976  | 2.72112  | -0.80819 |
| C  | 2.75956  | -0.70501 | 0.11361  |
| C  | 4.61655  | -1.86802 | -0.58117 |
| C  | 0.18509  | 1.75779  | 0.13377  |
| C  | 1.50015  | 2.51937  | -1.86178 |
| H  | 2.19992  | 1.74717  | -1.51298 |
| C  | 4.99722  | -1.10222 | 0.48453  |
| C  | -1.10710 | 3.64322  | 0.38266  |
| C  | 2.46875  | -2.21446 | -1.86056 |
| H  | 1.54579  | -2.63395 | -1.43489 |
| C  | -0.26879 | 3.86269  | -0.67338 |
| C  | -1.50477 | 1.73291  | 1.97507  |
| H  | -0.98397 | 1.94473  | 2.92193  |
| C  | 3.82310  | 0.52497  | 2.01108  |
| H  | 2.98471  | 1.21471  | 1.84090  |
| C  | -4.66276 | -0.28325 | 1.44533  |
| H  | -4.09925 | 0.35897  | 2.14167  |
| H  | -5.32521 | -0.92911 | 2.04756  |
| H  | -5.30713 | 0.36688  | 0.83060  |



|   |          |          |          |
|---|----------|----------|----------|
| C | -4.55765 | -2.40183 | -0.79914 |
| H | -5.09992 | -1.76255 | -1.51700 |
| H | -5.30717 | -3.00136 | -0.25279 |
| H | -3.92661 | -3.09287 | -1.38330 |
| C | -2.51794 | -2.50175 | 1.55319  |
| H | -1.82930 | -3.16557 | 1.00559  |
| H | -3.22004 | -3.13784 | 2.12166  |
| H | -1.92225 | -1.92532 | 2.27950  |
| C | -3.01657 | 0.84396  | -1.20183 |
| H | -3.63178 | 0.53179  | -2.06530 |
| H | -3.66232 | 1.40345  | -0.50179 |
| H | -2.24730 | 1.53480  | -1.57323 |
| H | 2.18122  | -1.45215 | -2.59709 |
| H | 3.06297  | -3.00395 | -2.34215 |
| H | 4.77138  | 1.08200  | 2.05957  |
| H | 3.65441  | -0.01226 | 2.95643  |
| H | 5.95624  | -0.99142 | 0.97850  |
| H | 5.18043  | -2.55011 | -1.20781 |
| H | 1.01364  | 2.16311  | -2.78112 |
| H | 2.02857  | 3.46729  | -2.04661 |
| H | -0.16064 | 4.71600  | -1.33353 |
| H | -1.86398 | 4.27266  | 0.83741  |
| H | -1.50903 | 0.65321  | 1.79859  |
| H | -2.53618 | 2.10890  | 2.02550  |
| C | 0.65319  | -1.02169 | 2.50108  |
| H | 0.46325  | -1.88759 | 1.89362  |
| C | 0.78806  | -0.30717 | 3.49123  |
| H | 0.94952  | 0.47739  | 4.20296  |

### IM1"

E(RB97D) = -3449.152765 E<sub>h</sub>

Sum of electronic and thermal Enthalpies = -3448.680076 E<sub>h</sub>

Sum of electronic and thermal Free Energies = -3448.781605 E<sub>h</sub>

Number of imaginary frequencies 0

|    |          |          |          |
|----|----------|----------|----------|
| Ni | 0.81794  | 0.04337  | -0.89110 |
| Cl | -0.64004 | -3.20270 | 0.24155  |
| Si | -0.95057 | -0.98911 | 0.51996  |
| Si | -3.78182 | 0.23991  | 0.56363  |
| N  | 0.39807  | 2.92397  | -0.14675 |
| N  | 2.80730  | -2.02740 | -0.09183 |
| N  | -2.55916 | -0.77370 | -0.21846 |
| N  | 2.49275  | 2.43230  | -0.22491 |
| N  | 2.43362  | -0.67936 | 1.54730  |
| C  | 1.24522  | 1.86465  | -0.38385 |
| C  | 1.08840  | 4.09141  | 0.16343  |
| C  | 2.04060  | -0.93700 | 0.24944  |
| C  | 1.89518  | 0.39749  | 2.37358  |
| H  | 2.44188  | 1.33778  | 2.20336  |
| C  | 2.41665  | 3.78021  | 0.11719  |
| C  | -0.10344 | 0.25446  | -2.54376 |
| C  | 3.63066  | -2.43602 | 0.95011  |
| C  | 0.09299  | -0.99946 | -2.30726 |
| C  | -1.04855 | 2.85500  | -0.32525 |
| H  | -1.32201 | 1.80101  | -0.44590 |
| C  | 3.39780  | -1.58026 | 1.98749  |

|   |          |          |          |
|---|----------|----------|----------|
| C | 2.66134  | -2.75655 | -1.34942 |
| H | 2.54700  | -2.03579 | -2.16795 |
| C | 3.74628  | 1.70054  | -0.38300 |
| H | 4.10000  | 1.30868  | 0.58352  |
| C | -4.40837 | 1.55380  | -0.67382 |
| H | -3.61102 | 2.24468  | -0.99298 |
| H | -5.22530 | 2.15674  | -0.23965 |
| H | -4.80340 | 1.06938  | -1.58321 |
| C | -5.27863 | -0.82408 | 1.07721  |
| H | -5.73950 | -1.33746 | 0.21691  |
| H | -6.06026 | -0.20361 | 1.55058  |
| H | -4.97313 | -1.59821 | 1.80094  |
| C | -3.10542 | 1.07848  | 2.13420  |
| H | -2.87059 | 0.33182  | 2.90985  |
| H | -3.87568 | 1.75909  | 2.54112  |
| H | -2.19098 | 1.66364  | 1.95702  |
| C | -3.02000 | -1.44300 | -1.45702 |
| H | -2.72369 | -0.85481 | -2.34296 |
| H | -2.56857 | -2.44240 | -1.53940 |
| H | -4.11732 | -1.57289 | -1.47153 |
| H | -1.55855 | 3.27870  | 0.55165  |
| H | -1.34553 | 3.41660  | -1.22544 |
| H | 4.50445  | 2.37430  | -0.80787 |
| H | 3.56719  | 0.85907  | -1.06152 |
| H | 3.30007  | 4.38643  | 0.28534  |
| H | 0.58074  | 5.02614  | 0.37448  |
| H | 0.83811  | 0.53266  | 2.11372  |
| H | 1.98451  | 0.10630  | 3.42983  |
| H | 3.81690  | -1.53433 | 2.98638  |
| H | 4.28645  | -3.29485 | 0.86367  |
| H | 1.76433  | -3.38969 | -1.30141 |
| H | 3.55852  | -3.37307 | -1.50450 |
| H | -0.51261 | 0.99961  | -3.21919 |
| H | -0.07258 | -2.02419 | -2.62367 |

## TS2''

E(RB97D) = -3449.144831 E<sub>h</sub>

Sum of electronic and thermal Enthalpies = -3448.673712 E<sub>h</sub>

Sum of electronic and thermal Free Energies = -3448.775502 E<sub>h</sub>

Number of imaginary frequencies 1,  $\nu = -133.8 \text{ cm}^{-1}$

|    |          |          |          |
|----|----------|----------|----------|
| Ni | 0.91409  | 0.06192  | -0.85554 |
| Cl | -1.16607 | -3.14035 | -0.03310 |
| Si | -1.10441 | -0.89695 | -0.06822 |
| Si | -3.72463 | 0.57529  | 0.66683  |
| N  | 0.98686  | 2.89507  | -0.16468 |
| N  | 2.48081  | -2.32676 | 0.02973  |
| N  | -2.79640 | -0.45180 | -0.41993 |
| N  | 2.98723  | 2.08404  | -0.28958 |
| N  | 2.22980  | -0.92841 | 1.65254  |
| C  | 1.66531  | 1.73204  | -0.46225 |
| C  | 1.85555  | 3.91891  | 0.19724  |
| C  | 1.96499  | -1.08647 | 0.31325  |
| C  | 1.73490  | 0.20972  | 2.42226  |

|   |          |          |          |
|---|----------|----------|----------|
| H | 2.26968  | 1.12897  | 2.14324  |
| C | 3.11919  | 3.40765  | 0.12256  |
| C | 0.02089  | 0.33896  | -2.44855 |
| C | 3.01234  | -2.93579 | 1.16091  |
| C | -0.47436 | -0.84154 | -2.09951 |
| C | -0.46424 | 3.04330  | -0.25954 |
| H | -0.90986 | 2.04102  | -0.22625 |
| C | 2.85539  | -2.04980 | 2.18865  |
| C | 2.31498  | -2.98551 | -1.26343 |
| H | 2.19509  | -2.20597 | -2.02682 |
| C | 4.10416  | 1.15912  | -0.45333 |
| H | 4.38985  | 0.71655  | 0.51396  |
| C | -4.26037 | 2.16664  | -0.25056 |
| H | -3.38565 | 2.77673  | -0.53514 |
| H | -4.92328 | 2.79458  | 0.37079  |
| H | -4.80629 | 1.92357  | -1.17838 |
| C | -5.30417 | -0.32720 | 1.24338  |
| H | -5.92990 | -0.64534 | 0.39254  |
| H | -5.92496 | 0.32152  | 1.88655  |
| H | -5.04349 | -1.23119 | 1.81902  |
| C | -2.71766 | 1.06829  | 2.20638  |
| H | -2.36782 | 0.18186  | 2.75935  |
| H | -3.35686 | 1.66563  | 2.88258  |
| H | -1.83178 | 1.67048  | 1.95242  |
| C | -3.50729 | -0.97041 | -1.60889 |
| H | -3.16937 | -0.45704 | -2.52733 |
| H | -3.31819 | -2.05055 | -1.72516 |
| H | -4.60091 | -0.83538 | -1.52630 |
| H | -0.82535 | 3.64527  | 0.58703  |
| H | -0.73965 | 3.53522  | -1.20563 |
| H | 4.96083  | 1.69982  | -0.88219 |
| H | 3.77999  | 0.35704  | -1.12628 |
| H | 4.08627  | 3.85918  | 0.31363  |
| H | 1.50061  | 4.90868  | 0.46153  |
| H | 0.66358  | 0.33115  | 2.19753  |
| H | 1.88413  | 0.00366  | 3.49121  |
| H | 3.12963  | -2.11238 | 3.23576  |
| H | 3.44410  | -3.92970 | 1.13306  |
| H | 1.40958  | -3.60992 | -1.24611 |
| H | 3.20346  | -3.59851 | -1.47728 |
| H | 0.04156  | 0.99656  | -3.31833 |
| H | -0.72536 | -1.71845 | -2.70941 |

6

E(RB97D) = -3449.190864 E<sub>h</sub>

Sum of electronic and thermal Enthalpies = -3448.716416 E<sub>h</sub>

Sum of electronic and thermal Free Energies = -3448.813325 E<sub>h</sub>

Number of imaginary frequencies 0

|    |          |          |          |
|----|----------|----------|----------|
| Ni | 0.61829  | 0.13142  | -0.66883 |
| Cl | -2.29946 | -2.05317 | -1.91381 |
| Si | -1.51064 | -0.07235 | -1.36802 |
| Si | -2.73347 | 0.96533  | 1.26893  |
| N  | 2.70008  | 2.21453  | -0.18545 |
| N  | 0.81340  | -2.63341 | 0.33216  |
| N  | -2.83968 | 0.65794  | -0.45579 |

|   |          |          |          |
|---|----------|----------|----------|
| N | 3.60187  | 0.26577  | -0.35833 |
| N | 0.98343  | -1.23507 | 1.96456  |
| C | 2.37837  | 0.89418  | -0.41288 |
| C | 4.06575  | 2.39115  | 0.01825  |
| C | 0.77775  | -1.28153 | 0.60140  |
| C | 1.01221  | 0.00113  | 2.73462  |
| H | 1.68982  | -0.12539 | 3.59199  |
| C | 4.63800  | 1.15644  | -0.09476 |
| C | 0.17531  | 1.17401  | -2.25475 |
| C | 1.01984  | -3.38885 | 1.48114  |
| C | -1.02504 | 0.89855  | -2.85592 |
| C | 1.71607  | 3.29351  | -0.11020 |
| H | 0.77983  | 2.92559  | -0.54478 |
| C | 1.11842  | -2.50630 | 2.51708  |
| C | 0.77385  | -3.20306 | -1.01245 |
| H | 0.56014  | -2.39323 | -1.71891 |
| C | 3.76658  | -1.17647 | -0.51707 |
| H | 3.62969  | -1.69369 | 0.44515  |
| C | -4.35314 | 1.77332  | 1.87243  |
| H | -4.56112 | 2.72059  | 1.34654  |
| H | -4.27914 | 2.00121  | 2.95032  |
| H | -5.22474 | 1.11234  | 1.73115  |
| C | -2.46955 | -0.63829 | 2.27041  |
| H | -3.36123 | -1.28278 | 2.18626  |
| H | -2.30085 | -0.43829 | 3.34450  |
| H | -1.61459 | -1.21453 | 1.88587  |
| C | -1.30646 | 2.18833  | 1.59307  |
| H | -0.38246 | 1.81759  | 1.12113  |
| H | -1.11290 | 2.35317  | 2.66825  |
| H | -1.54484 | 3.16212  | 1.13173  |
| C | -4.12779 | 0.76068  | -1.17691 |
| H | -3.95747 | 1.10438  | -2.21262 |
| H | -4.65338 | -0.21040 | -1.22790 |
| H | -4.79354 | 1.49124  | -0.69061 |
| H | 1.54010  | 3.58195  | 0.93804  |
| H | 2.08435  | 4.16369  | -0.67376 |
| H | 4.77271  | -1.38173 | -0.91013 |
| H | 3.00874  | -1.53308 | -1.22338 |
| H | 5.67346  | 0.83994  | -0.03354 |
| H | 4.50147  | 3.36631  | 0.20545  |
| H | 1.37835  | 0.80055  | 2.07963  |
| H | 0.00493  | 0.26077  | 3.08786  |
| H | 1.25708  | -2.66197 | 3.58109  |
| H | 1.07482  | -4.47141 | 1.45600  |
| H | -0.02569 | -3.95218 | -1.08149 |
| H | 1.74661  | -3.66625 | -1.24836 |
| H | 0.91221  | 1.86529  | -2.71074 |
| H | -1.38077 | 1.27143  | -3.82626 |

### TS3"

E(RB97D) = -3526.442159 E<sub>h</sub>

Sum of electronic and thermal Enthalpies = -3525.936815 E<sub>h</sub>

Sum of electronic and thermal Free Energies = -3526.038558 E<sub>h</sub>

Number of imaginary frequencies 1,  $\nu = -101.0 \text{ cm}^{-1}$

|    |          |          |         |
|----|----------|----------|---------|
| Ni | -0.19619 | -0.51072 | 0.63646 |
|----|----------|----------|---------|

|    |          |          |          |
|----|----------|----------|----------|
| Cl | 2.21959  | -0.36009 | -2.10636 |
| Si | 1.95299  | -0.22793 | 0.08814  |
| Si | 2.80512  | 2.09457  | 1.98996  |
| N  | -1.76211 | -3.17294 | 0.06295  |
| N  | -0.88981 | 2.16563  | -0.74999 |
| N  | 3.04441  | 1.11455  | 0.53861  |
| N  | -1.68691 | -1.85083 | -1.62897 |
| N  | -2.56989 | 1.24181  | 0.23085  |
| C  | -1.35766 | -1.90102 | -0.29017 |
| C  | -2.30061 | -3.87874 | -1.00902 |
| C  | -0.42795 | 0.08463  | 2.79966  |
| C  | -1.20947 | 1.05960  | 0.01837  |
| C  | -1.38671 | -0.61247 | 3.16263  |
| C  | -3.44010 | 0.35705  | 0.99769  |
| H  | -3.04008 | -0.65964 | 0.92580  |
| C  | -2.25280 | -3.03723 | -2.08095 |
| C  | 1.09148  | -1.87681 | 1.23120  |
| C  | -1.99232 | 2.97218  | -1.00174 |
| C  | 2.38668  | -1.84766 | 0.81080  |
| C  | -1.62887 | -3.74855 | 1.39508  |
| H  | -1.42299 | -2.93419 | 2.09606  |
| C  | -3.05425 | 2.39296  | -0.37594 |
| C  | 0.41353  | 2.47091  | -1.34012 |
| H  | 1.21508  | 2.27387  | -0.62280 |
| C  | -1.47616 | -0.68719 | -2.49135 |
| H  | -0.49055 | -0.26479 | -2.27686 |
| C  | 4.17534  | 3.41873  | 2.08912  |
| H  | 5.17161  | 2.98779  | 2.28082  |
| H  | 3.95105  | 4.11647  | 2.91500  |
| H  | 4.23498  | 4.01008  | 1.15937  |
| C  | 1.14827  | 3.03502  | 1.93345  |
| H  | 1.22663  | 3.89352  | 1.24499  |
| H  | 0.90361  | 3.43381  | 2.93380  |
| H  | 0.30900  | 2.41329  | 1.59447  |
| C  | 2.92938  | 1.02519  | 3.56966  |
| H  | 2.33466  | 0.10157  | 3.48612  |
| H  | 2.60861  | 1.56716  | 4.47707  |
| H  | 3.97821  | 0.71604  | 3.72291  |
| C  | 4.46760  | 0.85367  | 0.18303  |
| H  | 5.05547  | 1.78378  | 0.23510  |
| H  | 4.93965  | 0.10626  | 0.85033  |
| H  | 4.53730  | 0.47800  | -0.84908 |
| H  | -2.56504 | -4.26016 | 1.66950  |
| H  | -0.79640 | -4.46766 | 1.42599  |
| H  | -2.25404 | 0.07080  | -2.31576 |
| H  | -1.51392 | -1.02030 | -3.53789 |
| H  | -2.55761 | -3.17407 | -3.11253 |
| H  | -2.65407 | -4.89947 | -0.91351 |
| H  | -3.46882 | 0.66197  | 2.05338  |
| H  | -4.45196 | 0.40133  | 0.56729  |
| H  | -4.09251 | 2.69428  | -0.29363 |
| H  | -1.91499 | 3.87716  | -1.59317 |
| H  | 0.42225  | 3.53674  | -1.60927 |
| H  | 0.58829  | 1.86084  | -2.23544 |
| H  | -2.22319 | -1.27067 | 3.26900  |
| H  | 0.32932  | 0.81270  | 3.02168  |

|   |         |          |         |
|---|---------|----------|---------|
| H | 3.18146 | -2.56925 | 1.02942 |
| H | 0.68315 | -2.64192 | 1.91436 |

## IM2''

E(RB97D) = -3526.447465 E<sub>h</sub>

Sum of electronic and thermal Enthalpies = -3525.941487 E<sub>h</sub>

Sum of electronic and thermal Free Energies = -3526.042673 E<sub>h</sub>

Number of imaginary frequencies 0

|    |          |          |          |
|----|----------|----------|----------|
| Ni | 0.91582  | -0.22900 | -0.86837 |
| Cl | -1.32542 | -0.55041 | 2.23659  |
| Si | -1.05206 | -0.91403 | 0.08744  |
| Si | -4.15677 | -0.09786 | 0.20969  |
| N  | 3.22704  | -1.92526 | 0.15911  |
| N  | 0.30276  | 2.68201  | -0.04725 |
| N  | -2.61347 | -0.39048 | -0.61576 |
| N  | 2.61904  | -0.51415 | 1.66361  |
| N  | 2.40178  | 2.30997  | -0.32878 |
| C  | 2.32633  | -0.90567 | 0.37475  |
| C  | 4.03762  | -2.15854 | 1.26470  |
| C  | 0.59210  | 0.32056  | -2.78266 |
| C  | 1.17670  | 1.67305  | -0.36816 |
| C  | 1.80668  | -0.04308 | -2.78198 |
| C  | 3.69391  | 1.67775  | -0.58298 |
| H  | 3.53540  | 0.83654  | -1.26321 |
| C  | 3.65624  | -1.26007 | 2.21636  |
| C  | 0.24314  | -2.07978 | -1.17572 |
| C  | 0.95347  | 3.88438  | 0.20518  |
| C  | -0.67252 | -2.64700 | -0.34145 |
| C  | 3.30683  | -2.71004 | -1.06821 |
| H  | 2.93561  | -2.08608 | -1.88862 |
| C  | 2.28458  | 3.64951  | 0.02661  |
| C  | -1.14506 | 2.52414  | 0.07852  |
| H  | -1.40443 | 2.16473  | 1.08299  |
| C  | 1.99148  | 0.59447  | 2.37944  |
| H  | 0.98936  | 0.74593  | 1.97631  |
| C  | -4.71076 | -1.59031 | 1.25457  |
| H  | -4.79725 | -2.49477 | 0.62778  |
| H  | -5.69659 | -1.40731 | 1.71870  |
| H  | -3.98849 | -1.80454 | 2.05774  |
| C  | -4.12704 | 1.46355  | 1.30330  |
| H  | -3.39324 | 1.38829  | 2.11913  |
| H  | -5.12321 | 1.61452  | 1.75651  |
| H  | -3.89529 | 2.36301  | 0.70779  |
| C  | -5.49055 | 0.20929  | -1.12412 |
| H  | -5.25704 | 1.08469  | -1.75398 |
| H  | -6.45785 | 0.40509  | -0.62919 |
| H  | -5.62627 | -0.65692 | -1.79233 |
| C  | -2.71430 | -0.70576 | -2.06388 |
| H  | -3.25372 | -1.65308 | -2.25550 |
| H  | -3.23726 | 0.09907  | -2.60763 |
| H  | -1.71298 | -0.81272 | -2.50356 |
| H  | 4.35506  | -2.99579 | -1.24243 |
| H  | 2.68215  | -3.61195 | -0.99052 |
| H  | 2.58530  | 1.51531  | 2.26293  |

|   |          |          |          |
|---|----------|----------|----------|
| H | 1.91792  | 0.33195  | 3.44383  |
| H | 4.01160  | -1.09021 | 3.22656  |
| H | 4.79074  | -2.93858 | 1.27495  |
| H | 4.36618  | 2.42085  | -1.03603 |
| H | 4.13410  | 1.30314  | 0.35428  |
| H | 3.14516  | 4.30569  | 0.09391  |
| H | 0.41238  | 4.78618  | 0.46805  |
| H | -1.49872 | 1.78867  | -0.65011 |
| H | -1.62027 | 3.49941  | -0.09988 |
| H | 2.73554  | -0.15589 | -3.32801 |
| H | -0.28488 | 0.72122  | -3.27521 |
| H | -1.06022 | -3.67239 | -0.37797 |
| H | 0.71078  | -2.57166 | -2.04706 |

#### TS4''

E(RB97D) = -3526.424408 E<sub>h</sub>

Sum of electronic and thermal Enthalpies = -3525.919584 E<sub>h</sub>

Sum of electronic and thermal Free Energies = -3526.018804 E<sub>h</sub>

Number of imaginary frequencies 1,  $\nu = -212.6 \text{ cm}^{-1}$

|    |          |          |          |
|----|----------|----------|----------|
| Ni | 0.47283  | -0.59914 | -0.56728 |
| Cl | -2.22518 | -0.32972 | 1.82801  |
| Si | -1.94094 | -0.51192 | -0.36544 |
| Si | -4.53434 | 1.42397  | -0.12382 |
| N  | 2.54885  | -2.55743 | 0.01678  |
| N  | 0.93249  | 2.29215  | 0.23305  |
| N  | -3.34644 | 0.40348  | -0.95458 |
| N  | 2.07414  | -1.37509 | 1.76697  |
| N  | 2.75314  | 1.31471  | -0.37230 |
| C  | 1.70403  | -1.56139 | 0.45847  |
| C  | 3.42359  | -2.95955 | 1.02059  |
| C  | -0.62168 | 0.30084  | -2.06547 |
| C  | 1.41187  | 1.07505  | -0.17993 |
| C  | 0.39939  | -0.27687 | -2.65696 |
| C  | 3.68620  | 0.32347  | -0.90213 |
| H  | 3.14343  | -0.28471 | -1.63716 |
| C  | 3.12676  | -2.21199 | 2.12400  |
| C  | -0.47742 | -2.33350 | -0.70788 |
| C  | 1.93730  | 3.25215  | 0.29533  |
| C  | -1.83323 | -2.30276 | -0.71295 |
| C  | 2.60344  | -3.04286 | -1.36133 |
| H  | 1.97184  | -2.37752 | -1.97168 |
| C  | 3.09240  | 2.63292  | -0.08535 |
| C  | -0.47389 | 2.56182  | 0.52534  |
| H  | -0.82227 | 1.90941  | 1.33222  |
| C  | 1.46932  | -0.37635 | 2.64521  |
| H  | 0.41479  | -0.27052 | 2.36842  |
| C  | -5.74114 | 0.39725  | 0.93159  |
| H  | -6.25142 | -0.36167 | 0.31318  |
| H  | -6.51907 | 1.03371  | 1.39035  |
| H  | -5.20538 | -0.12960 | 1.73655  |
| C  | -3.73715 | 2.77963  | 0.95206  |
| H  | -3.10391 | 2.36747  | 1.75025  |
| H  | -4.53454 | 3.37822  | 1.42756  |
| H  | -3.12969 | 3.46812  | 0.34080  |

|   |          |          |          |
|---|----------|----------|----------|
| C | -5.55026 | 2.33834  | -1.45918 |
| H | -4.90244 | 2.92691  | -2.13143 |
| H | -6.25066 | 3.03978  | -0.97288 |
| H | -6.14645 | 1.65304  | -2.08350 |
| C | -3.75679 | -0.02629 | -2.32056 |
| H | -4.69354 | -0.61507 | -2.30028 |
| H | -3.90946 | 0.84113  | -2.98466 |
| H | -2.98200 | -0.65880 | -2.78218 |
| H | 3.64714  | -3.01586 | -1.71234 |
| H | 2.22497  | -4.07428 | -1.42135 |
| H | 1.97972  | 0.59292  | 2.53253  |
| H | 1.55419  | -0.72272 | 3.68517  |
| H | 3.54433  | -2.21433 | 3.12438  |
| H | 4.15628  | -3.74302 | 0.86370  |
| H | 4.52248  | 0.84970  | -1.38393 |
| H | 4.07014  | -0.32538 | -0.10077 |
| H | 4.10597  | 3.00395  | -0.18627 |
| H | 1.73703  | 4.27379  | 0.59736  |
| H | -1.08770 | 2.37599  | -0.36535 |
| H | -0.57327 | 3.61310  | 0.82598  |
| H | 0.84861  | 0.05246  | -3.60255 |
| H | -1.22032 | 1.20391  | -2.23128 |
| H | -2.50059 | -3.16019 | -0.86571 |
| H | 0.10493  | -3.26181 | -0.80324 |

### IM3''

E(RB97D) = -3526.526266 E<sub>h</sub>

Sum of electronic and thermal Enthalpies = -3526.018505 E<sub>h</sub>

Sum of electronic and thermal Free Energies = -3526.12184 E<sub>h</sub>

Number of imaginary frequencies 0

|    |          |          |          |
|----|----------|----------|----------|
| Ni | 1.26032  | -0.07141 | -0.66024 |
| Cl | -1.60655 | -0.23232 | 2.25891  |
| Si | -2.00459 | -0.54775 | 0.11948  |
| Si | -4.91660 | 0.31520  | -0.47418 |
| N  | 3.50334  | -2.04875 | -0.64632 |
| N  | 1.96307  | 2.49519  | 0.74045  |
| N  | -3.71649 | -0.89058 | 0.02292  |
| N  | 2.96809  | -1.41660 | 1.34223  |
| N  | 3.41342  | 1.97849  | -0.76544 |
| C  | 2.65019  | -1.20820 | 0.02619  |
| C  | 4.33033  | -2.75363 | 0.22741  |
| C  | -1.48824 | 0.95935  | -0.83716 |
| C  | 2.23065  | 1.54521  | -0.21379 |
| C  | -0.20318 | 1.01434  | -1.28419 |
| C  | 4.11680  | 1.24769  | -1.81252 |
| H  | 3.37630  | 0.65074  | -2.35851 |
| C  | 3.98849  | -2.35196 | 1.48706  |
| C  | 0.27520  | -1.70541 | -0.95890 |
| C  | 2.95378  | 3.47238  | 0.79088  |
| C  | -0.95952 | -1.96985 | -0.45710 |
| C  | 3.51131  | -2.19386 | -2.09798 |
| H  | 2.62787  | -1.67168 | -2.48677 |



|   |          |          |          |
|---|----------|----------|----------|
| C | 3.87332  | 3.14676  | -0.16418 |
| C | 0.79509  | 2.46226  | 1.62138  |
| H | 1.06856  | 2.06120  | 2.60918  |
| C | 2.28736  | -0.72750 | 2.43849  |
| H | 1.23248  | -0.59074 | 2.16886  |
| C | -6.65784 | -0.38502 | -0.14214 |
| H | -6.85555 | -1.29886 | -0.72723 |
| H | -7.41850 | 0.36244  | -0.42714 |
| H | -6.80887 | -0.62678 | 0.92310  |
| C | -4.71302 | 1.92243  | 0.52894  |
| H | -4.86699 | 1.72411  | 1.60325  |
| H | -5.44123 | 2.69130  | 0.21463  |
| H | -3.70201 | 2.34617  | 0.41833  |
| C | -4.74640 | 0.67514  | -2.33499 |
| H | -3.70535 | 0.91983  | -2.59876 |
| H | -5.38931 | 1.51689  | -2.64822 |
| H | -5.03666 | -0.21151 | -2.92444 |
| C | -4.16656 | -2.11251 | 0.72749  |
| H | -4.38091 | -1.92326 | 1.79593  |
| H | -5.07583 | -2.52273 | 0.26034  |
| H | -3.39037 | -2.89451 | 0.67974  |
| H | 4.42557  | -1.75278 | -2.52730 |
| H | 3.46022  | -3.25929 | -2.36747 |
| H | 2.75284  | 0.25357  | 2.62112  |
| H | 2.35824  | -1.34384 | 3.34550  |
| H | 4.36203  | -2.65276 | 2.45948  |
| H | 5.06278  | -3.47344 | -0.12047 |
| H | 4.60380  | 1.96034  | -2.49444 |
| H | 4.87343  | 0.57529  | -1.37754 |
| H | 4.78498  | 3.64137  | -0.48052 |
| H | 2.90232  | 4.30839  | 1.47942  |
| H | 0.03703  | 1.82091  | 1.16183  |
| H | 0.40194  | 3.48287  | 1.73617  |
| H | 0.05382  | 1.86206  | -1.94640 |
| H | -2.20713 | 1.73947  | -1.12331 |
| H | -1.38323 | -2.98408 | -0.52169 |
| H | 0.80992  | -2.55583 | -1.42167 |

## TS5''

$E(\text{RB97D}) = -3526.491612 E_h$

Sum of electronic and thermal Enthalpies =  $-3525.986943 E_h$

Sum of electronic and thermal Free Energies =  $-3526.09313 E_h$

Number of imaginary frequencies 1,  $\nu = -439.7 \text{ cm}^{-1}$

|    |          |          |          |
|----|----------|----------|----------|
| Ni | -0.90877 | 0.42336  | -0.65321 |
| Cl | 2.30905  | -0.01202 | 1.96609  |
| Si | 2.54422  | 0.03794  | -0.18715 |
| Si | 5.00271  | -1.61821 | -1.02263 |
| N  | -2.11816 | 3.19574  | -0.60627 |
| N  | -1.87391 | -2.06464 | 0.75499  |
| N  | 4.25040  | -0.09340 | -0.51126 |
| N  | -1.61918 | 2.47377  | 1.35976  |
| N  | -3.42061 | -1.14902 | -0.43088 |
| C  | -1.64612 | 2.07175  | 0.04257  |
| C  | -2.36083 | 4.24939  | 0.27293  |

|   |          |          |          |
|---|----------|----------|----------|
| C | 1.52782  | -1.22330 | -1.09365 |
| C | -2.09424 | -0.98683 | -0.07738 |
| C | 0.41006  | -0.60198 | -1.62493 |
| C | -4.10757 | -0.24720 | -1.34583 |
| H | -3.67607 | 0.75372  | -1.21141 |
| C | -2.03657 | 3.79121  | 1.51818  |
| C | 0.61556  | 1.26032  | -1.54868 |
| C | -3.01331 | -2.84772 | 0.91762  |
| C | 1.79536  | 1.58140  | -0.91966 |
| C | -2.32294 | 3.25907  | -2.04674 |
| H | -2.03398 | 2.28470  | -2.46173 |
| C | -3.99170 | -2.27412 | 0.15711  |
| C | -0.61553 | -2.27969 | 1.46617  |
| H | -0.64053 | -1.79943 | 2.45733  |
| C | -1.09978 | 1.62065  | 2.42624  |
| H | -0.00724 | 1.71462  | 2.50357  |
| C | 6.88762  | -1.46332 | -0.79789 |
| H | 7.32462  | -0.69524 | -1.45777 |
| H | 7.37333  | -2.42394 | -1.04226 |
| H | 7.15483  | -1.20707 | 0.24085  |
| C | 4.36799  | -3.05264 | 0.05649  |
| H | 4.66776  | -2.90644 | 1.10787  |
| H | 4.77732  | -4.02014 | -0.28448 |
| H | 3.26876  | -3.12402 | 0.03702  |
| C | 4.61396  | -1.96024 | -2.85290 |
| H | 3.52605  | -1.91686 | -3.02326 |
| H | 4.97759  | -2.95246 | -3.17398 |
| H | 5.08241  | -1.20025 | -3.50163 |
| C | 5.09264  | 1.04804  | -0.09088 |
| H | 5.41667  | 0.95820  | 0.96253  |
| H | 5.99230  | 1.12552  | -0.72161 |
| H | 4.53748  | 1.99609  | -0.19139 |
| H | -3.38109 | 3.46405  | -2.27965 |
| H | -1.69563 | 4.04760  | -2.49149 |
| H | -1.34139 | 0.58129  | 2.16873  |
| H | -1.57567 | 1.90147  | 3.37791  |
| H | -2.06879 | 4.27680  | 2.48759  |
| H | -2.74669 | 5.20759  | -0.05785 |
| H | -3.96933 | -0.56409 | -2.39250 |
| H | -5.18184 | -0.23469 | -1.10701 |
| H | -5.02128 | -2.56399 | -0.02241 |
| H | -3.02414 | -3.72741 | 1.55190  |
| H | 0.19490  | -1.84444 | 0.87096  |
| H | -0.45163 | -3.36056 | 1.58983  |
| H | -0.07360 | -1.05918 | -2.50727 |
| H | 1.84974  | -2.20749 | -1.44058 |
| H | 2.32016  | 2.51857  | -1.12856 |
| H | 0.25069  | 1.90630  | -2.36700 |

#### IM4''

E(RB97D) = -3526.570116 E<sub>h</sub>

Sum of electronic and thermal Enthalpies = -3526.061362 E<sub>h</sub>

Sum of electronic and thermal Free Energies = -3526.166306 E<sub>h</sub>

Number of imaginary frequencies 0

|    |          |          |          |
|----|----------|----------|----------|
| Ni | -0.75482 | 0.00509  | -0.62643 |
| Cl | 2.38389  | 1.41048  | 1.13400  |
| Si | 2.38973  | -0.36789 | -0.08965 |
| Si | 5.19034  | -1.62302 | 0.04536  |
| N  | -0.44412 | 2.84108  | -1.48554 |
| N  | -2.77307 | -1.18469 | 1.21758  |
| N  | 4.02412  | -0.51112 | -0.69229 |
| N  | -0.89206 | 2.67951  | 0.61547  |
| N  | -3.67918 | -0.41230 | -0.58058 |
| C  | -0.74061 | 1.90505  | -0.51471 |
| C  | -0.38171 | 4.13169  | -0.96825 |
| C  | 1.75529  | -1.85786 | 0.83207  |
| C  | -2.44580 | -0.56242 | 0.02526  |
| C  | 0.70970  | -2.33854 | 0.08714  |
| C  | -3.83750 | 0.18533  | -1.90013 |
| H  | -2.99815 | 0.87810  | -2.05228 |
| C  | -0.65754 | 4.02673  | 0.36426  |
| C  | 0.30507  | -1.60935 | -1.13582 |
| C  | -4.14312 | -1.40939 | 1.33510  |
| C  | 1.04395  | -0.38296 | -1.38533 |
| C  | -0.16200 | 2.50269  | -2.87409 |
| H  | -0.38184 | 1.43641  | -3.00375 |
| C  | -4.71550 | -0.92674 | 0.19393  |
| C  | -1.79293 | -1.52880 | 2.24154  |
| H  | -2.03220 | -1.01339 | 3.18628  |
| C  | -1.12824 | 2.11401  | 1.93898  |
| H  | -0.17894 | 1.77402  | 2.37821  |
| C  | 6.92616  | -1.21149 | -0.62689 |
| H  | 6.99966  | -1.36590 | -1.71666 |
| H  | 7.67541  | -1.86676 | -0.14963 |
| H  | 7.21099  | -0.16738 | -0.41445 |
| C  | 5.20212  | -1.41442 | 1.93841  |
| H  | 5.45014  | -0.37555 | 2.21313  |
| H  | 5.94361  | -2.08291 | 2.41109  |
| H  | 4.21722  | -1.64271 | 2.37650  |
| C  | 4.74965  | -3.41990 | -0.39254 |
| H  | 3.70308  | -3.62678 | -0.11585 |
| H  | 5.39962  | -4.14277 | 0.13197  |
| H  | 4.84975  | -3.59505 | -1.47746 |
| C  | 4.45991  | 0.53745  | -1.63725 |
| H  | 4.77003  | 1.46599  | -1.12135 |
| H  | 5.30532  | 0.18684  | -2.24942 |
| H  | 3.63816  | 0.79615  | -2.32925 |
| H  | -0.79126 | 3.10634  | -3.54772 |
| H  | 0.89967  | 2.68401  | -3.10617 |
| H  | -1.80551 | 1.25890  | 1.82813  |
| H  | -1.58801 | 2.88128  | 2.57966  |
| H  | -0.71184 | 4.77825  | 1.14402  |
| H  | -0.16261 | 4.99482  | -1.58704 |
| H  | -3.81868 | -0.58529 | -2.68811 |
| H  | -4.79283 | 0.73036  | -1.94414 |
| H  | -5.75005 | -0.90228 | -0.13089 |
| H  | -4.58040 | -1.88015 | 2.20886  |
| H  | -0.80452 | -1.21759 | 1.88274  |
| H  | -1.78696 | -2.61659 | 2.41475  |
| H  | 0.13831  | -3.22945 | 0.37946  |

|   |          |          |          |
|---|----------|----------|----------|
| H | 2.05905  | -2.31305 | 1.77538  |
| H | 1.19995  | -0.04517 | -2.41557 |
| H | -0.16304 | -2.18863 | -1.94139 |

- 
- 1 T. J. Hadlington, T. Szilvasi, M. Driess, *Angew. Chem. Int. Ed.* **2017**, *56*, 7470-7474.
- 2 G. M. Sheldrick, *Acta Cryst.*, 2015, *A71*, 3-8
- 3 G. M. Sheldrick, *Acta Cryst.*, 2015, *C71*, 3-8
- 4 (a) Frisch, M. J.; Pople, J. A.; Binkley, V. J. *Chem. Phys.*, 1984, *80*, 3265-3269; (b) A. D. Becke, *J. Chem. Phys.*, 1997, *107*, 8554-8560; (c) S. Grimme *J. Comput. Chem.*, 2006, *27*, 1787-1799.
- 5 Gaussian 09, Revision D.01, Frisch, M. J.; Trucks, G. W.; Schlegel, H. B.; Scuseria, G. E.; Robb, M. A.; Cheeseman, J. R.; Scalmani, G.; Barone, V.; Mennucci, B.; Petersson, G. A.; Nakatsuji, H.; Caricato, M.; Li, X.; Hratchian, H. P.; Izmaylov, A. F.; Bloino, J.; Zheng, G.; Sonnenberg, J. L.; Hada, M.; Ehara, M.; Toyota, K.; Fukuda, R.; Hasegawa, J.; Ishida, M.; Nakajima, T.; Honda, Y.; Kitao, O.; Nakai, H.; Vreven, T.; Montgomery, J. A., Jr., J. E. P.; Ogliaro, F.; Bearpark, M.; Heyd, J. J.; Brothers, E.; Kudin, K. N.; Staroverov, V. N.; Kobayashi, R.; Normand, J.; Raghavachari, K.; Rendell, A.; Burant, J. C.; Iyengar, S. S.; Tomasi, J.; Cossi, M.; Rega, N.; Millam, J. M.; Klene, M.; Knox, J. E.; Cross, J. B.; Bakken, V.; Adamo, C.; Jaramillo, J.; Gomperts, R.; Stratmann, R. E.; Yazyev, O.; Austin, A. J.; Cammi, R.; Pomelli, C.; Ochterski, J. W.; Martin, R. L.; Morokuma, K.; Zakrzewski, V. G.; Voth, G. A.; Salvador, P.; Dannenberg, J. J.; Dapprich, S.; Daniels, A. D.; Farkas, Ö.; Foresman, J. B.; Ortiz, J. V.; Cioslowski, J.; Fox, D. J.; Gaussian, Inc., Wallingford CT, 2009.
